# Supplementary material for: Лидеры сибирского областничества и первый университет в азиатской части России
Source: publisher site journal article supplement (doi:10.3762/bjoc.16.222), 2011-01-01

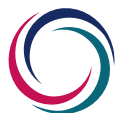

## Supporting Information

for

### **Nocarimidazoles C and D, antimicrobial alkanoylimidazoles from a coral-derived actinomycete *Kocuria* sp.: application of $^1J_{C,H}$ coupling constants for the unequivocal determination of substituted imidazoles and stereochemical diversity of anteisoalkyl chains in microbial metabolites**

Md. Rokon Ul Karim, Enjuro Harunari, Amit Raj Sharma, Naoya Oku, Kazuaki Akasaka, Daisuke Urabe, Mada Triandala Sibero and Yasuhiro Igarashi

*Beilstein J. Org. Chem.* **2020**, *16*, 2719–2727. doi:10.3762/bjoc.16.222

## Copies of the NMR spectra for compounds 1 and 2

## Table of Contents

|                                                                                                                                            |     |
|--------------------------------------------------------------------------------------------------------------------------------------------|-----|
| Experimental section .....                                                                                                                 | S2  |
| <b>Figure S1.</b> UV spectrum of nocarimidazole C ( <b>1</b> ) .....                                                                       | S6  |
| <b>Figure S2.</b> IR spectrum of <b>1</b> .....                                                                                            | S7  |
| <b>Figure S3.</b> <sup>1</sup> H NMR spectrum of <b>1</b> (500 MHz, DMSO- <i>d</i> <sub>6</sub> with TFA).....                             | S8  |
| <b>Figure S4.</b> <sup>13</sup> C NMR spectrum of <b>1</b> (125 MHz, DMSO- <i>d</i> <sub>6</sub> with TFA).....                            | S9  |
| <b>Figure S5.</b> COSY spectrum of <b>1</b> (500 MHz, DMSO- <i>d</i> <sub>6</sub> with TFA) .....                                          | S10 |
| <b>Figure S6.</b> HSQC spectrum of <b>1</b> (500 MHz, DMSO- <i>d</i> <sub>6</sub> with TFA) .....                                          | S11 |
| <b>Figure S7.</b> Coupled HSQC spectrum of <b>1</b> (500 MHz, DMSO- <i>d</i> <sub>6</sub> with TFA).....                                   | S12 |
| <b>Figure S8.</b> HMBC spectrum of <b>1</b> (500 MHz, DMSO- <i>d</i> <sub>6</sub> with TFA) .....                                          | S13 |
| <b>Figure S9.</b> UV spectrum of nocarimidazole D ( <b>2</b> ).....                                                                        | S14 |
| <b>Figure S10.</b> IR spectrum of <b>2</b> .....                                                                                           | S15 |
| <b>Figure S11.</b> <sup>1</sup> H NMR spectrum of <b>2</b> (500 MHz, DMSO- <i>d</i> <sub>6</sub> with TFA).....                            | S16 |
| <b>Figure S12.</b> <sup>13</sup> C NMR spectrum of <b>2</b> (125 MHz, DMSO- <i>d</i> <sub>6</sub> with TFA).....                           | S17 |
| <b>Figure S13.</b> COSY spectrum of <b>2</b> (500 MHz, DMSO- <i>d</i> <sub>6</sub> with TFA) .....                                         | S18 |
| <b>Figure S14.</b> HSQC spectrum of <b>2</b> (500 MHz, DMSO- <i>d</i> <sub>6</sub> with TFA) .....                                         | S19 |
| <b>Figure S15.</b> HMBC spectrum of <b>2</b> (500 MHz, DMSO- <i>d</i> <sub>6</sub> with TFA) .....                                         | S20 |
| <b>Figure S16.</b> <sup>1</sup> H NMR spectrum of <b>3</b> (500 MHz, DMSO- <i>d</i> <sub>6</sub> with TFA).....                            | S21 |
| <b>Figure S17.</b> <sup>13</sup> C NMR spectrum of <b>3</b> (125 MHz, DMSO- <i>d</i> <sub>6</sub> with TFA).....                           | S22 |
| <b>Figure S18.</b> <sup>1</sup> H NMR spectrum of <b>4</b> (500 MHz, DMSO- <i>d</i> <sub>6</sub> with TFA).....                            | S23 |
| <b>Figure S19.</b> <sup>13</sup> C NMR spectrum of <b>4</b> (125 MHz, DMSO- <i>d</i> <sub>6</sub> with TFA).....                           | S24 |
| <b>Figure S20.</b> <sup>1</sup> H NMR spectrum of <b>5</b> (500 MHz, DMSO- <i>d</i> <sub>6</sub> with TFA).....                            | S25 |
| <b>Figure S21.</b> <sup>13</sup> C NMR spectrum of <b>5</b> (125 MHz, DMSO- <i>d</i> <sub>6</sub> with TFA).....                           | S26 |
| <b>Figure S22.</b> Coupled HSQC spectrum of <b>5</b> (500 MHz, DMSO- <i>d</i> <sub>6</sub> with TFA) .....                                 | S27 |
| <b>Figure S23.</b> <sup>1</sup> H NMR spectrum of <b>8</b> (500 MHz, DMSO- <i>d</i> <sub>6</sub> with TFA).....                            | S28 |
| <b>Figure S24.</b> <sup>13</sup> C NMR spectrum of <b>8</b> (125 MHz, DMSO- <i>d</i> <sub>6</sub> with TFA).....                           | S29 |
| <b>Figure S25.</b> HSQC spectrum of <b>8</b> (500 MHz, DMSO- <i>d</i> <sub>6</sub> with TFA) .....                                         | S30 |
| <b>Figure S26.</b> Coupled HSQC spectrum of <b>8</b> (500 MHz, DMSO- <i>d</i> <sub>6</sub> with TFA).....                                  | S31 |
| <b>Figure S27.</b> HMBC spectrum of <b>8</b> (500 MHz, DMSO- <i>d</i> <sub>6</sub> with TFA) .....                                         | S32 |
| <b>Figure S28.</b> <sup>1</sup> H NMR spectrum of <b>9</b> (500 MHz, DMSO- <i>d</i> <sub>6</sub> with TFA).....                            | S33 |
| <b>Figure S29.</b> <sup>13</sup> C NMR spectrum of <b>9</b> (125 MHz, DMSO- <i>d</i> <sub>6</sub> with TFA).....                           | S34 |
| <b>Figure S30.</b> HSQC spectrum of <b>9</b> (500 MHz, DMSO- <i>d</i> <sub>6</sub> with TFA) .....                                         | S35 |
| <b>Figure S31.</b> Coupled HSQC spectrum of <b>9</b> (500 MHz, DMSO- <i>d</i> <sub>6</sub> with TFA).....                                  | S36 |
| <b>Figure S32.</b> HMBC spectrum of <b>9</b> (500 MHz, DMSO- <i>d</i> <sub>6</sub> with TFA) .....                                         | S37 |
| <b>Figure S33.</b> <sup>1</sup> H NMR spectrum of <i>nat</i> - <b>10</b> -( <i>R</i> )-2A1P (500 MHz, CDCl <sub>3</sub> ).....             | S38 |
| <b>Figure S34.</b> <sup>1</sup> H NMR spectrum of authentic ( <i>S</i> )- <b>10</b> -( <i>R</i> )-2A1P (500 MHz, CDCl <sub>3</sub> ).....  | S39 |
| <b>Figure S35.</b> <sup>1</sup> H NMR spectrum of authentic ( <i>S</i> )- <b>10</b> -( <i>S</i> )-2A1P (500 MHz, CDCl <sub>3</sub> ).....  | S40 |
| <b>Figure S36.</b> <sup>1</sup> H NMR spectrum of <i>nat</i> - <b>11</b> -( <i>R</i> )-2A1P (500 MHz, CDCl <sub>3</sub> ).....             | S41 |
| <b>Figure S37.</b> <sup>1</sup> H NMR spectrum of <i>nat</i> - <b>12</b> -( <i>R</i> )-2A1P (500 MHz, CDCl <sub>3</sub> ).....             | S42 |
| <b>Figure S38.</b> <sup>1</sup> H NMR spectrum of authentic ( <i>S</i> )- <b>11</b> -( <i>R</i> )-2A1P (500 MHz, CDCl <sub>3</sub> ).....  | S43 |
| <b>Figure S39.</b> <sup>1</sup> H NMR spectrum of authentic ( <i>S</i> )- <b>11</b> -( <i>S</i> )-2A1P (500 MHz, CDCl <sub>3</sub> ) ..... | S44 |

## Experimental section

Nocarimidazole C (**1**): pale yellow amorphous solid;  $[\alpha]_D^{23}$  -1.2 (*c* 0.10, MeOH); UV (MeOH)  $\lambda_{\max}$  (log  $\epsilon$ ) 296 (4.27), 226 (3.87), 200 (4.30) nm; IR (ATR)  $\nu_{\max}$  3127, 2955, 2923, 1664  $\text{cm}^{-1}$ ;  $^1\text{H}$  and  $^{13}\text{C}$  NMR data, see Table 1; HRESITOFMS  $m/z$  224.1763  $[\text{M} + \text{H}]^+$  (calcd for  $\text{C}_{12}\text{H}_{22}\text{N}_3\text{O}$ , 224.1757).

Nocarimidazole D (**2**): pale yellow amorphous solid; UV (MeOH)  $\lambda_{\max}$  (log  $\epsilon$ ) 296 (4.47), 225 (4.07), 200 (4.52) nm; IR (ATR)  $\nu_{\max}$  3126, 2954, 2923, 1667  $\text{cm}^{-1}$ ;  $^1\text{H}$  and  $^{13}\text{C}$  NMR data, see Table 1; HRESITOFMS  $m/z$  238.1915  $[\text{M} + \text{H}]^+$  (calcd for  $\text{C}_{13}\text{H}_{24}\text{N}_3\text{O}$ , 238.1913).

Nocarimidazole A (**3**): UV (MeOH)  $\lambda_{\max}$  (log  $\epsilon$ ) 295 (4.35), 232 (3.91), 200 (4.36) nm; HRESITOFMS  $m/z$  238.1910  $[\text{M} + \text{H}]^+$  (calcd for  $\text{C}_{13}\text{H}_{24}\text{N}_3\text{O}$ , 238.1914);  $^1\text{H}$  and  $^{13}\text{C}$  NMR data in  $\text{CDCl}_3$  was the same as those reported in Reference 21 from the Main Manuscript.

Nocarimidazole B (**4**):  $[\alpha]_D^{23}$  +1.2 (*c* 0.10, MeOH); UV (MeOH)  $\lambda_{\max}$  (log  $\epsilon$ ) 296 (4.32), 233 (3.89), 200 (4.34) nm; HRESITOFMS  $m/z$  252.2074  $[\text{M} + \text{H}]^+$  (calcd for  $\text{C}_{14}\text{H}_{26}\text{N}_3\text{O}$ , 252.2070);  $^1\text{H}$  and  $^{13}\text{C}$  NMR data in  $\text{CDCl}_3$  was the same as those reported in Reference 21 from the Main Manuscript.

Bulbimidazole A (**5**):  $[\alpha]_D^{23}$  +1.2 (*c* 0.10, MeOH); HRESITOFMS  $m/z$  237.1965  $[\text{M} + \text{H}]^+$  (calcd for  $\text{C}_{14}\text{H}_{25}\text{N}_2\text{O}$ , 237.1961);  $^1\text{H}$  and  $^{13}\text{C}$  NMR data in  $\text{DMSO}-d_6$  with a trace amount of TFA was the same as those reported in Reference 22 from the Main Manuscript.

### Synthesis of 1-(5-amino-1*H*-imidazol-4-yl)ethan-1-one (**8**)

To a solution of 4-isocyano-1*H*-imidazol-5-amine (100 mg, 92  $\mu\text{mol}$ ) in THF (9.2 mL) was added 1.0 M solution of  $\text{MeMgBr}$  (4.6 mL) at room temperature. After stirring for 2 h, 3 M  $\text{HCl}$  (10 mL) was added to the reaction mixture. After stirring at 90  $^\circ\text{C}$  for 2 h, the reaction mixture was cooled to the ambient temperature and concentrated in vacuo. The resulting liquid mixture received a saturated solution of  $\text{NaHCO}_3$  (100 mL) and was then extracted with  $\text{EtOAc}$ . The organic layer was then washed with water and brine, dried over anhydrous  $\text{Na}_2\text{SO}_4$  and concentrated in vacuo to give

62 mg of the crude material. This was then purified by preparative HPLC (XTerra Shield RP18 OBD™ Prep Column, 10 μm, 10 × 250 mm, 4 mL/min, Waters) with an isocratic elution MeCN/10 mM NH<sub>4</sub>HCO<sub>3</sub> (5:95) to afford 1-(5-amino-1*H*-imidazol-4-yl)ethan-1-one (**8**, 32 mg, 27% yield): <sup>1</sup>H NMR (DMSO-*d*<sub>6</sub> with TFA, 500 MHz) δ<sub>H</sub> 2.27 (3H, s), 7.77 (1H, s); <sup>13</sup>C NMR (DMSO-*d*<sub>6</sub> with TFA, 125 MHz) δ<sub>C</sub> 187.1, 148.9, 132.4, 113.4, 26.3; HRESITOFMS *m/z* 126.0665 [M + H]<sup>+</sup> (calcd for C<sub>5</sub>H<sub>8</sub>N<sub>3</sub>O 126.0667).

### Synthesis of 1-(2-amino-1*H*-imidazol-4-yl)ethan-1-one (**9**)

To a solution of pyrimidin-2-amine (100 mg, 105 μmol) in toluene (4 mL) was added 1,1-dimethoxy-*N,N*-dimethylmethanamine (200 μL, 157 μmol), and the mixture was stirred at 110 °C for 2 h. After cooling, EtOAc was added to the reaction mixture, and this organic layer was washed with water and brine, dried over anhydrous Na<sub>2</sub>SO<sub>4</sub> and concentrated in vacuo to afford (*E*)-*N,N*-dimethyl-*N'*-(pyrimidin-2-yl)formimidamide (88 mg).

(*E*)-*N,N*-Dimethyl-*N'*-(pyrimidin-2-yl)formimidamide (88 mg, 59 μmol) was then treated with 1-chloropropan-2-one (190 μL, 210 μmol) in dry CH<sub>2</sub>Cl<sub>2</sub> (4 mL) at room temperature. After stirring for 2 days, EtOAc was added to the reaction mixture, and the organic layer was washed with water and brine, dried over anhydrous Na<sub>2</sub>SO<sub>4</sub> and concentrated under reduced pressure to give 3-acetylimidazo[1,2-*a*]pyrimidine (82 mg).

A solution of 3-acetylimidazo[1,2-*a*]pyrimidine (82 mg, 50 μmol) was reacted with N<sub>2</sub>H<sub>4</sub> (180 μL, 200 μmol) in H<sub>2</sub>O (3 mL) at room temperature for 30 min. The reaction mixture was extracted with EtOAc and the organic layer was washed with water and brine, dried over anhydrous Na<sub>2</sub>SO<sub>4</sub> and concentrated in vacuo to give 78 mg of crude product. The crude material was subjected to preparative HPLC (XTerra Shield RP18 OBD™ Prep Column, 10 μm, 10 × 250 mm, 4 mL/min, Waters, MA) with an isocratic elution MeCN/10 mM NH<sub>4</sub>HCO<sub>3</sub> (2:98) to yield 1-(5-amino-1*H*-imidazol-4-yl)ethan-1-one (**9**, 65 mg, 56% overall yield): <sup>1</sup>H NMR (DMSO-*d*<sub>6</sub> with

TFA, 500 MHz)  $\delta_{\text{H}}$  2.34 (3H, s), 8.0 (1H, s);  $^{13}\text{C}$  NMR (DMSO- $d_6$  with TFA, 125 MHz)  $\delta_{\text{C}}$  186.6, 148.8, 127.0, 122.8, 25.4; HRESITOFMS  $m/z$  126.0663  $[\text{M} + \text{H}]^+$  (calcd for  $\text{C}_5\text{H}_8\text{N}_3\text{O}$  126.0667).

## Determination of the absolute configuration of **1**, **4**, and **5** by the Ohri–Akasaka method

Authentic samples for HPLC comparison of the (*R*)- and (*S*)-2-(anthracene-2,3-dicarboximido)propyl esters of (*S*)-6-methyloctanoic acid ((*S*)-**10**-(*R*)-2A1P and (*S*)-**10**-(*S*)-2A1P) and (*S*)-8-methyldecanoic acid ((*S*)-**11**-(*R*)-2A1P and (*S*)-**11**-(*S*)-2A1P) were prepared as described in our previous study, see References 22 and 30 from the Main Manuscript.

Nocarimidazole C (**1**, 0.5 mg, 2  $\mu\text{mol}$ ) was converted to the ester derivative *nat*-**10**-(*R*)-2A1P (1.1 mg) in a similar manner as described previously in Reference 22 from the Main Manuscript. Oxidative degradation of nocarimidazole D (**4**, 0.5 mg, 2  $\mu\text{mol}$ ) and bulbimidazole A (**5**, 0.5 mg, 2  $\mu\text{mol}$ ) and derivatization with (*R*)-2A1P were carried out in a similar manner, yielding the ester derivatives *nat*-**11**-(*R*)-2A1P (0.7 mg) and *nat*-**12**-(*R*)-2A1P (0.7 mg).

*nat*-**10**-(*R*)-2A1P: HRESITOFMS  $m/z$  468.2152  $[\text{M} + \text{Na}]^+$  (calcd for  $\text{C}_{28}\text{H}_{31}\text{NO}_4\text{Na}$ , 468.2145).

*nat*-**11**-(*R*)-2A1P: HRESITOFMS  $m/z$  496.2455  $[\text{M} + \text{Na}]^+$  (calcd for  $\text{C}_{30}\text{H}_{35}\text{NO}_4\text{Na}$ , 496.2458).

*nat*-**12**-(*R*)-2A1P: HRESITOFMS  $m/z$  496.2456  $[\text{M} + \text{Na}]^+$  (calcd for  $\text{C}_{30}\text{H}_{35}\text{NO}_4\text{Na}$ , 496.2458).

*nat*-**10**-(*R*)-2A1P and synthetic (*S*)-**10**-(*R*)-2A1P and (*S*)-**10**-(*S*)-2A1P were analyzed by HPLC according to the reported protocol in Reference 22 from the Main Manuscript, with minor modifications of the conditions. Column chromatography: tandemly connected Develosil ODS-HG-3 (3.0 mm i. d.  $\times$  250 mm + 3.0 mm i. d.  $\times$  150 mm, Nomura Chemical); mobile phase: MeCN/MeOH/THF 3:1:1; column temperature:  $-48.0\text{ }^\circ\text{C}$ ; flow rate: 0.075 mL/min. The column was cooled by using Cryocool CC-100 (Neslab Instruments Inc.) HPLC peaks were detected by monitoring the fluorescence intensity at 460 nm, with excitation at 298 nm on an FP-4025 fluorescence detector (JASCO Corporation, Hachioji, Japan). The retention times were 177 min for

(*S*)-**10**-(*S*)-2A1P and 184 min for (*S*)-**10**-(*R*)-2A1P, while *nat*-**10**-(*R*)-2A1P gave peaks at 177 and 184 min with an area ratio of 72.9:27.1.

*nat*-**11**-(*R*)-2A1P derived from nocarimidazoles **B** (**4**) and synthetic (*S*)-**11**-(*R*)-2A1P and (*S*)-**11**-(*S*)-2A1P were analyzed by HPLC using the same column and solvent system. The column temperature was set at −42.5 °C and the flow rate at 0.10 mL/min. The retention times were 234 min for (*S*)-**11**-(*S*)-2A1P and 244 min for (*S*)-**11**-(*R*)-2A1P, whereas *nat*-**4**-(*R*)-2A1P gave a peak only at 244 min.

*nat*-**12**-(*R*)-2A1P derived from bulbimidazole **A** (**5**) and synthetic (*S*)-**11**-(*R*)-2A1P and (*S*)-**11**-(*S*)-2A1P were analyzed by HPLC using the same column and solvent system. The column temperature was set at −42.5 °C and the flow rate at 0.075 mL/min. The retention times were 312 min for (*S*)-**11**-(*S*)-2A1P and 324 min for (*S*)-**11**-(*R*)-2A1P, while *nat*-**12**-(*R*)-2A1P gave peaks at 312 and 324 min in a ratio of 1.4:98.6.

**Figure S1.** UV spectrum of nocarimidazole C (**1**)

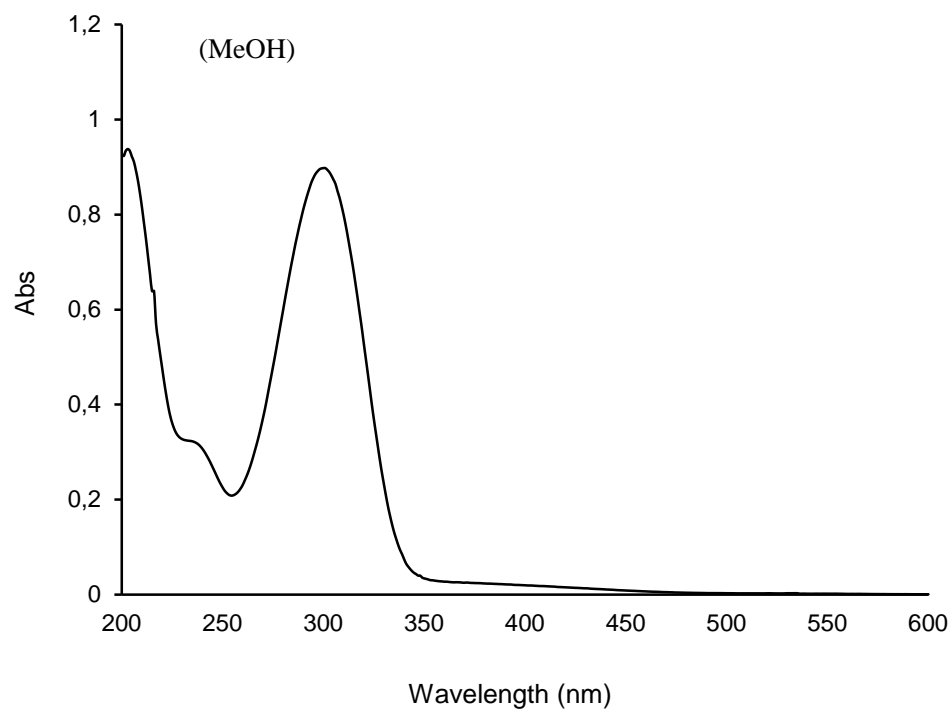

**Figure S2.** IR spectrum of **1**

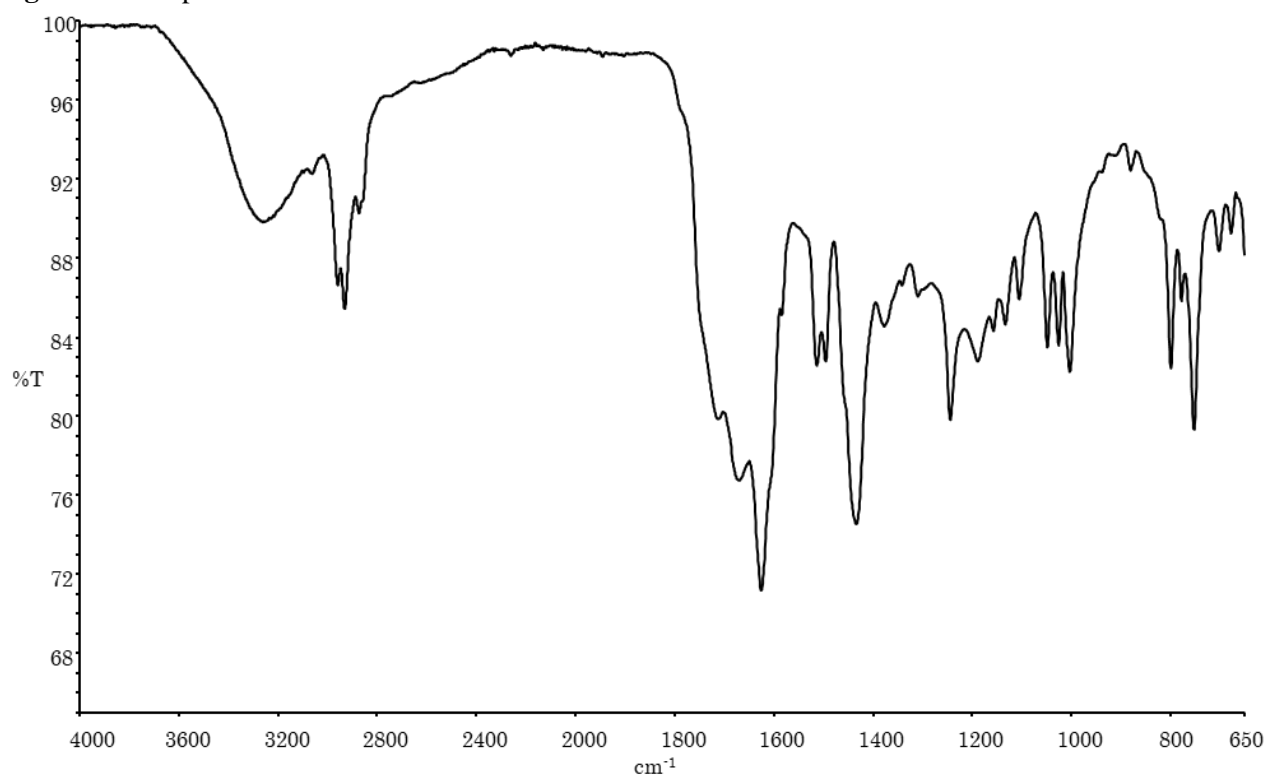



**Figure S3.**  $^1\text{H}$  NMR spectrum of **1** (500 MHz,  $\text{DMSO-}d_6$  with TFA)

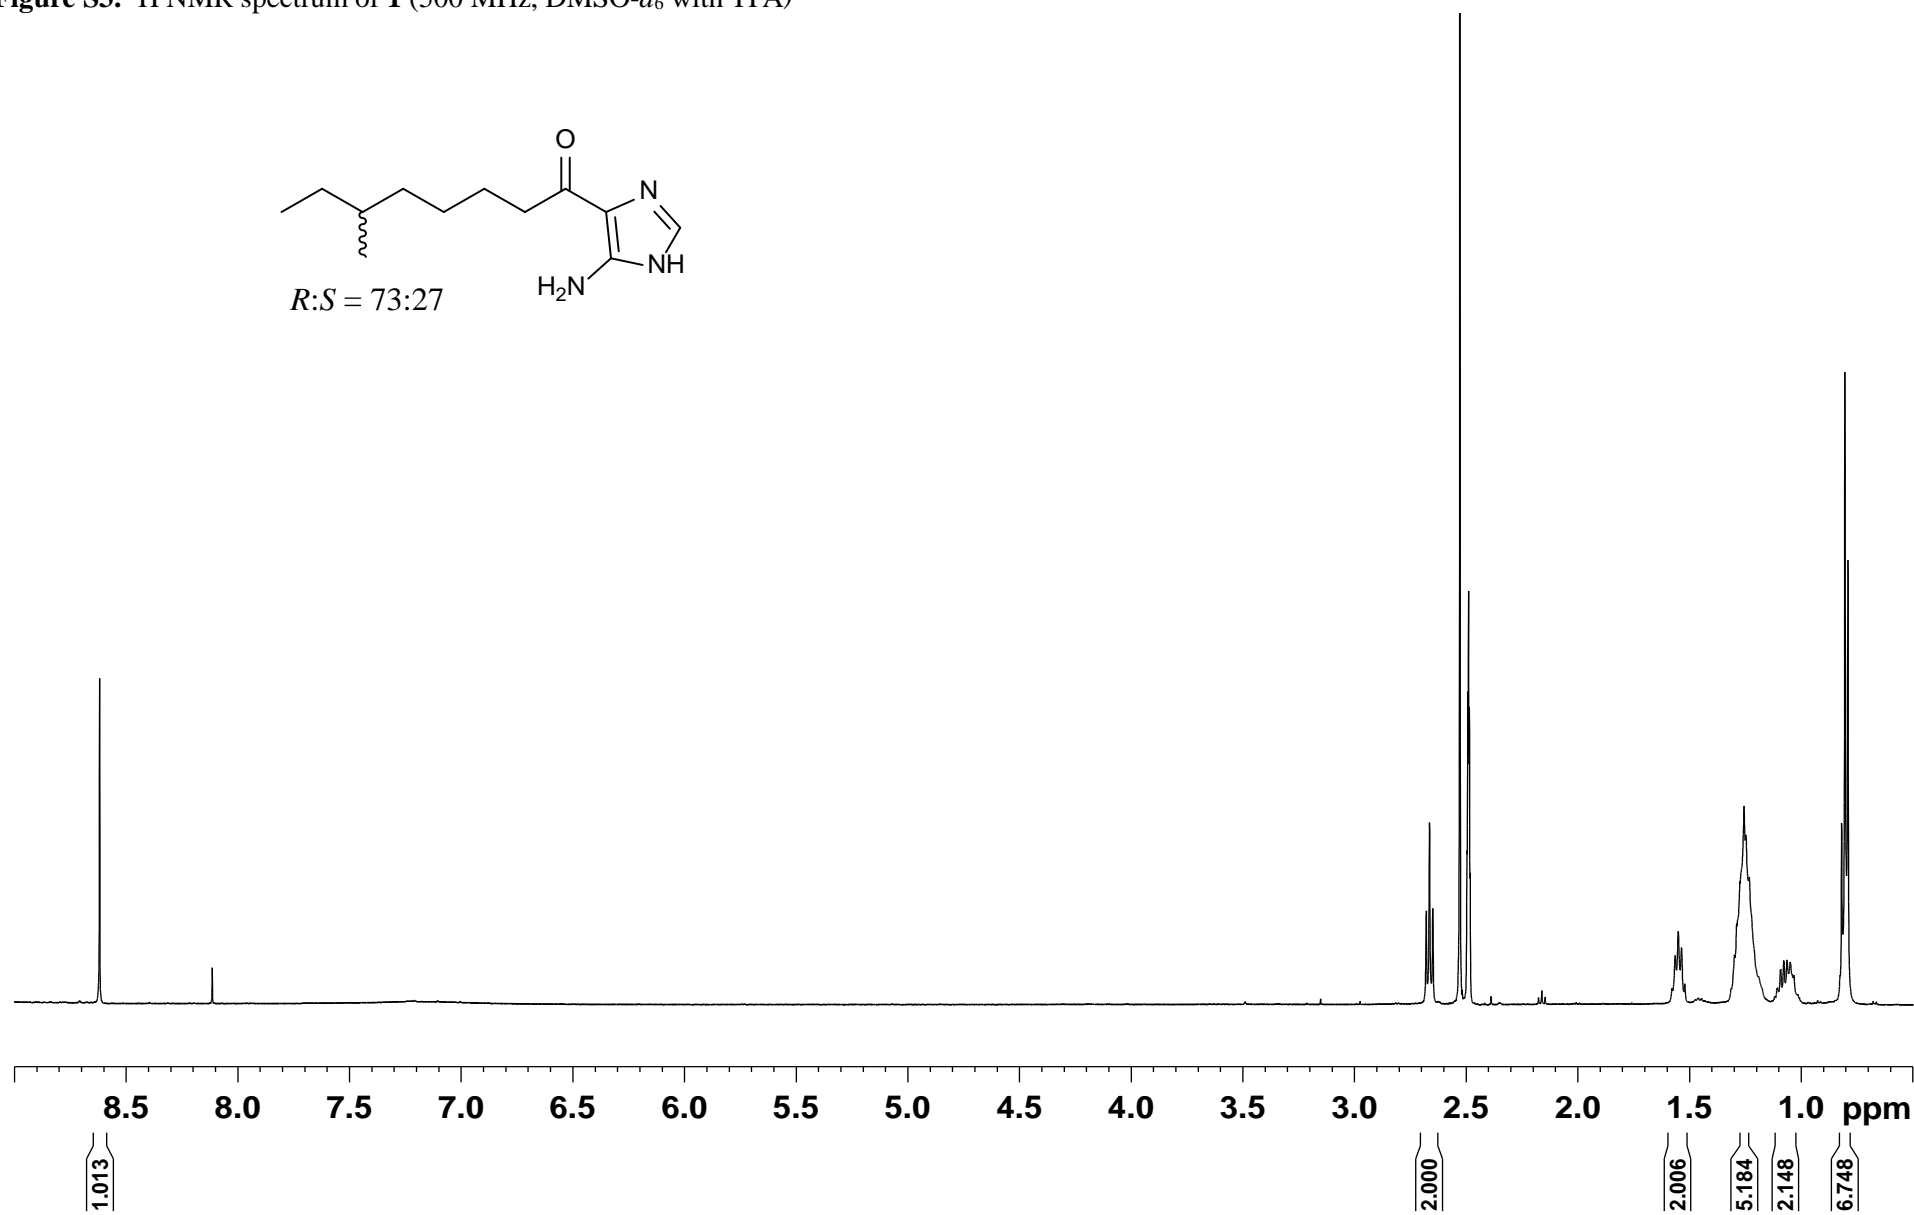

**Figure S4.**  $^{13}\text{C}$  NMR spectrum of **1** (125 MHz,  $\text{DMSO-}d_6$  with TFA)

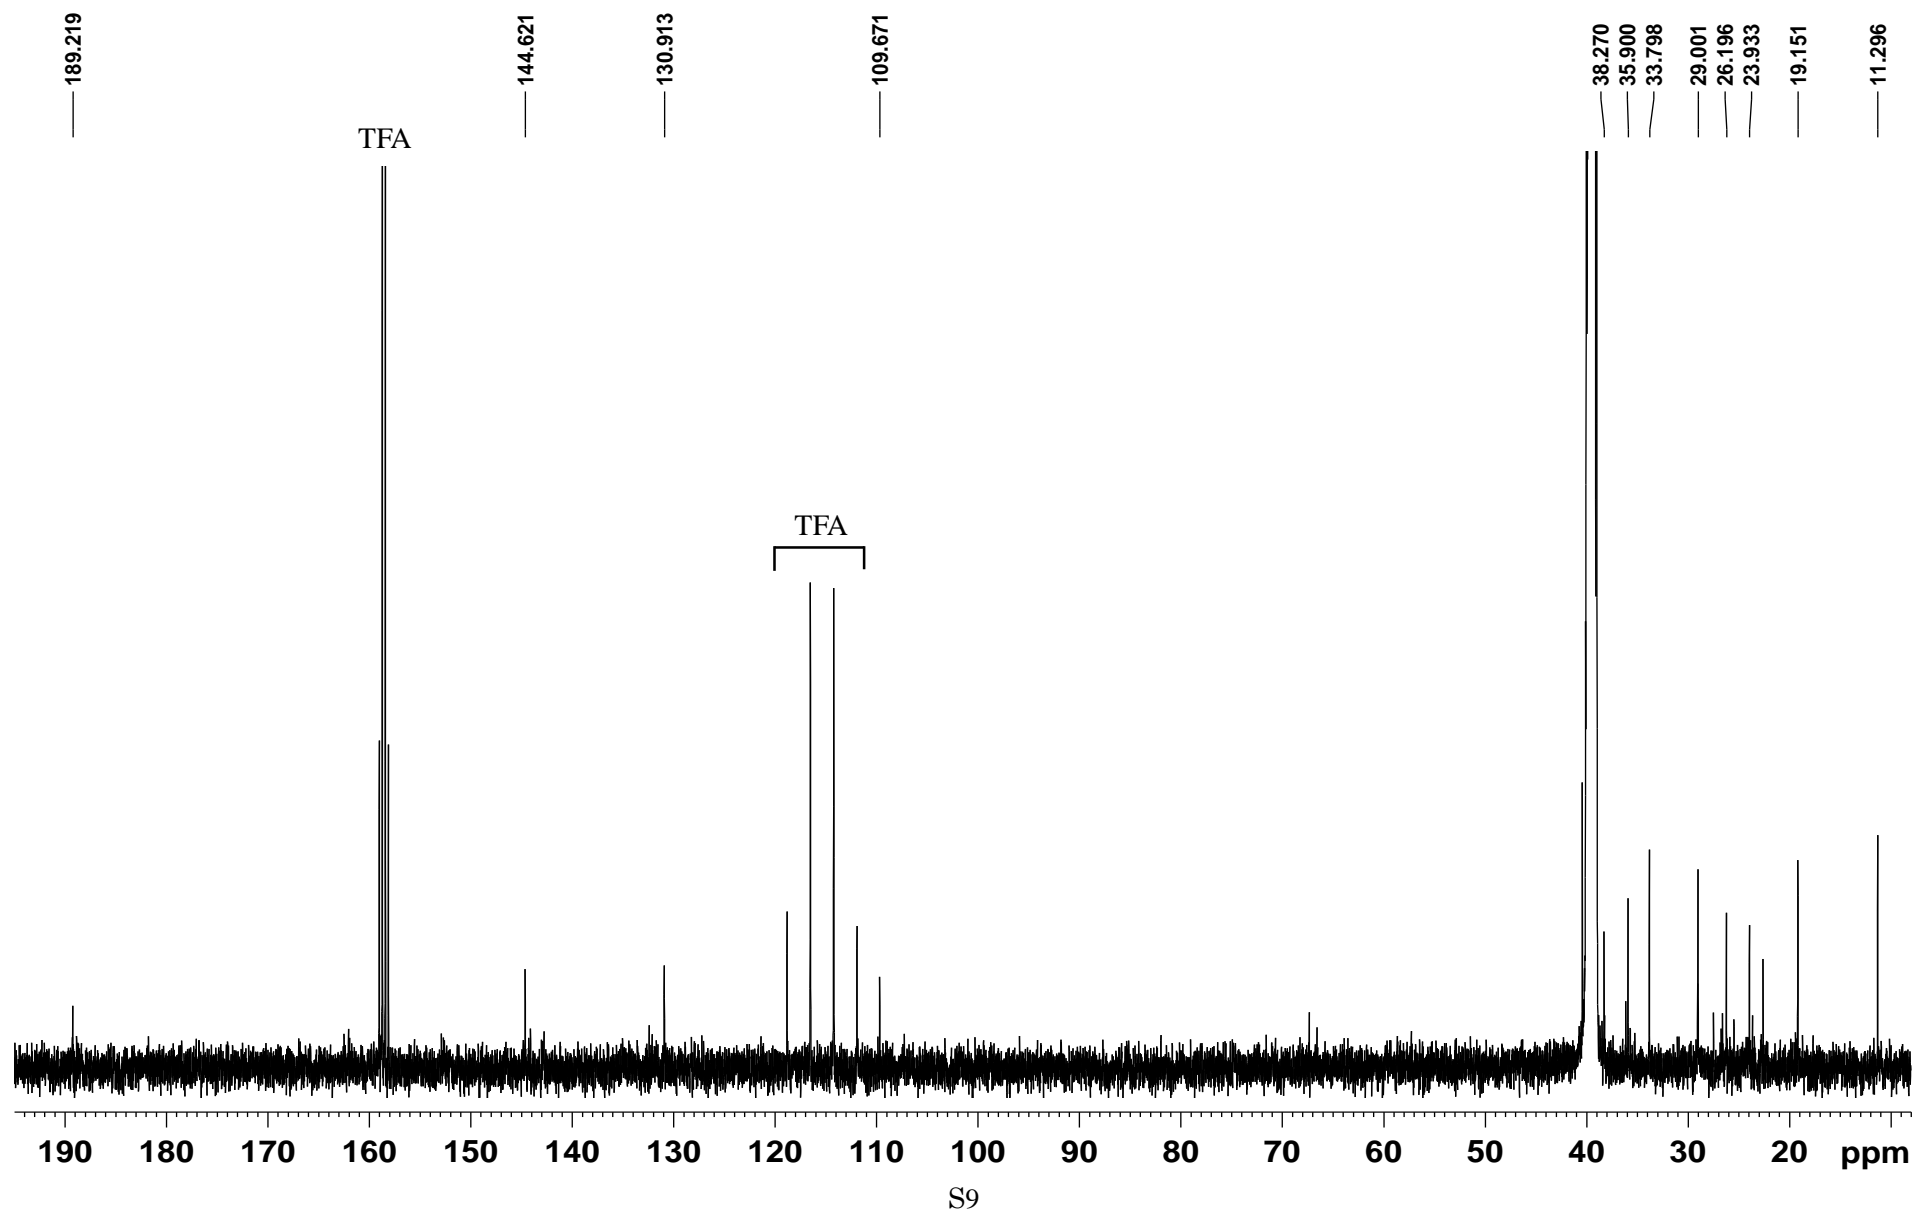

**Figure S5.** COSY spectrum of **1** (500 MHz, DMSO- $d_6$  with TFA)

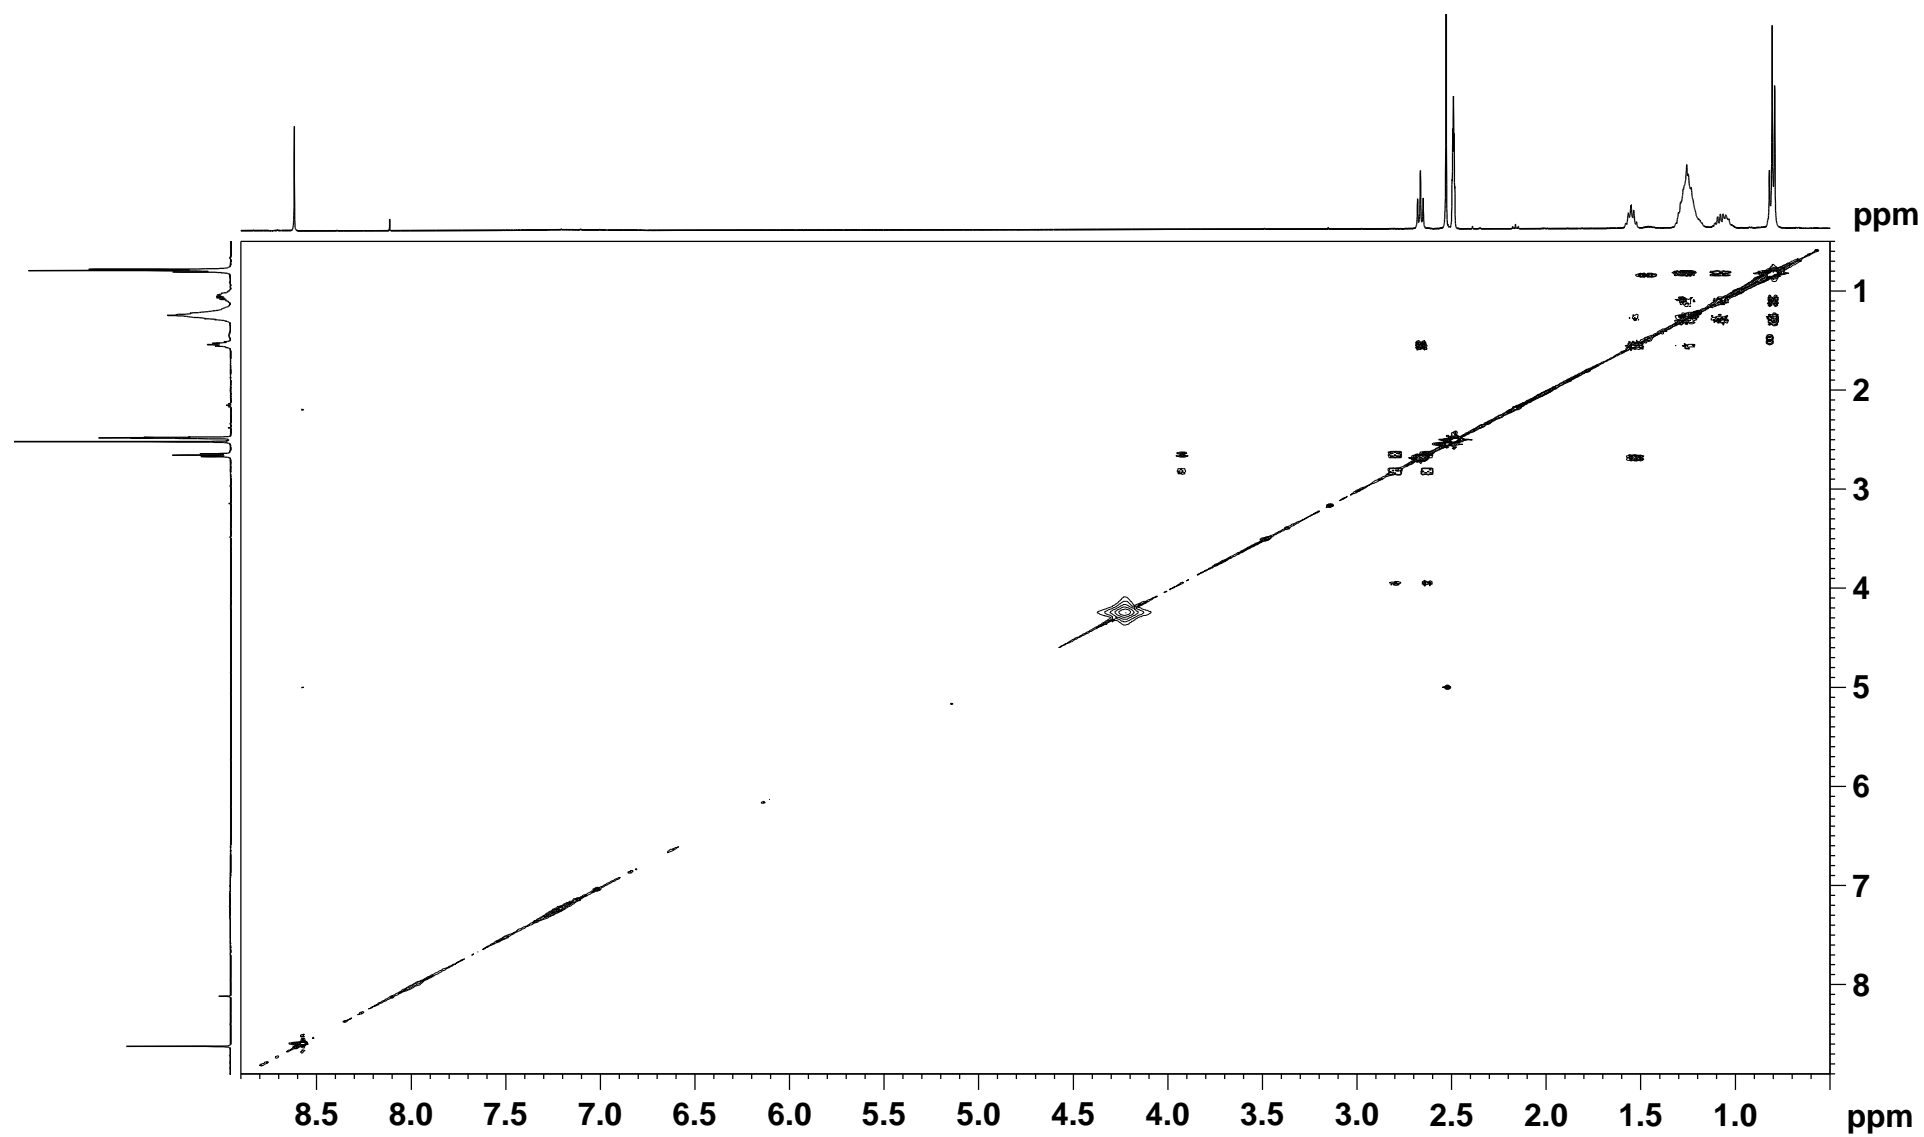

**Figure S6.** HSQC spectrum of **1** (500 MHz, DMSO- $d_6$  with TFA)

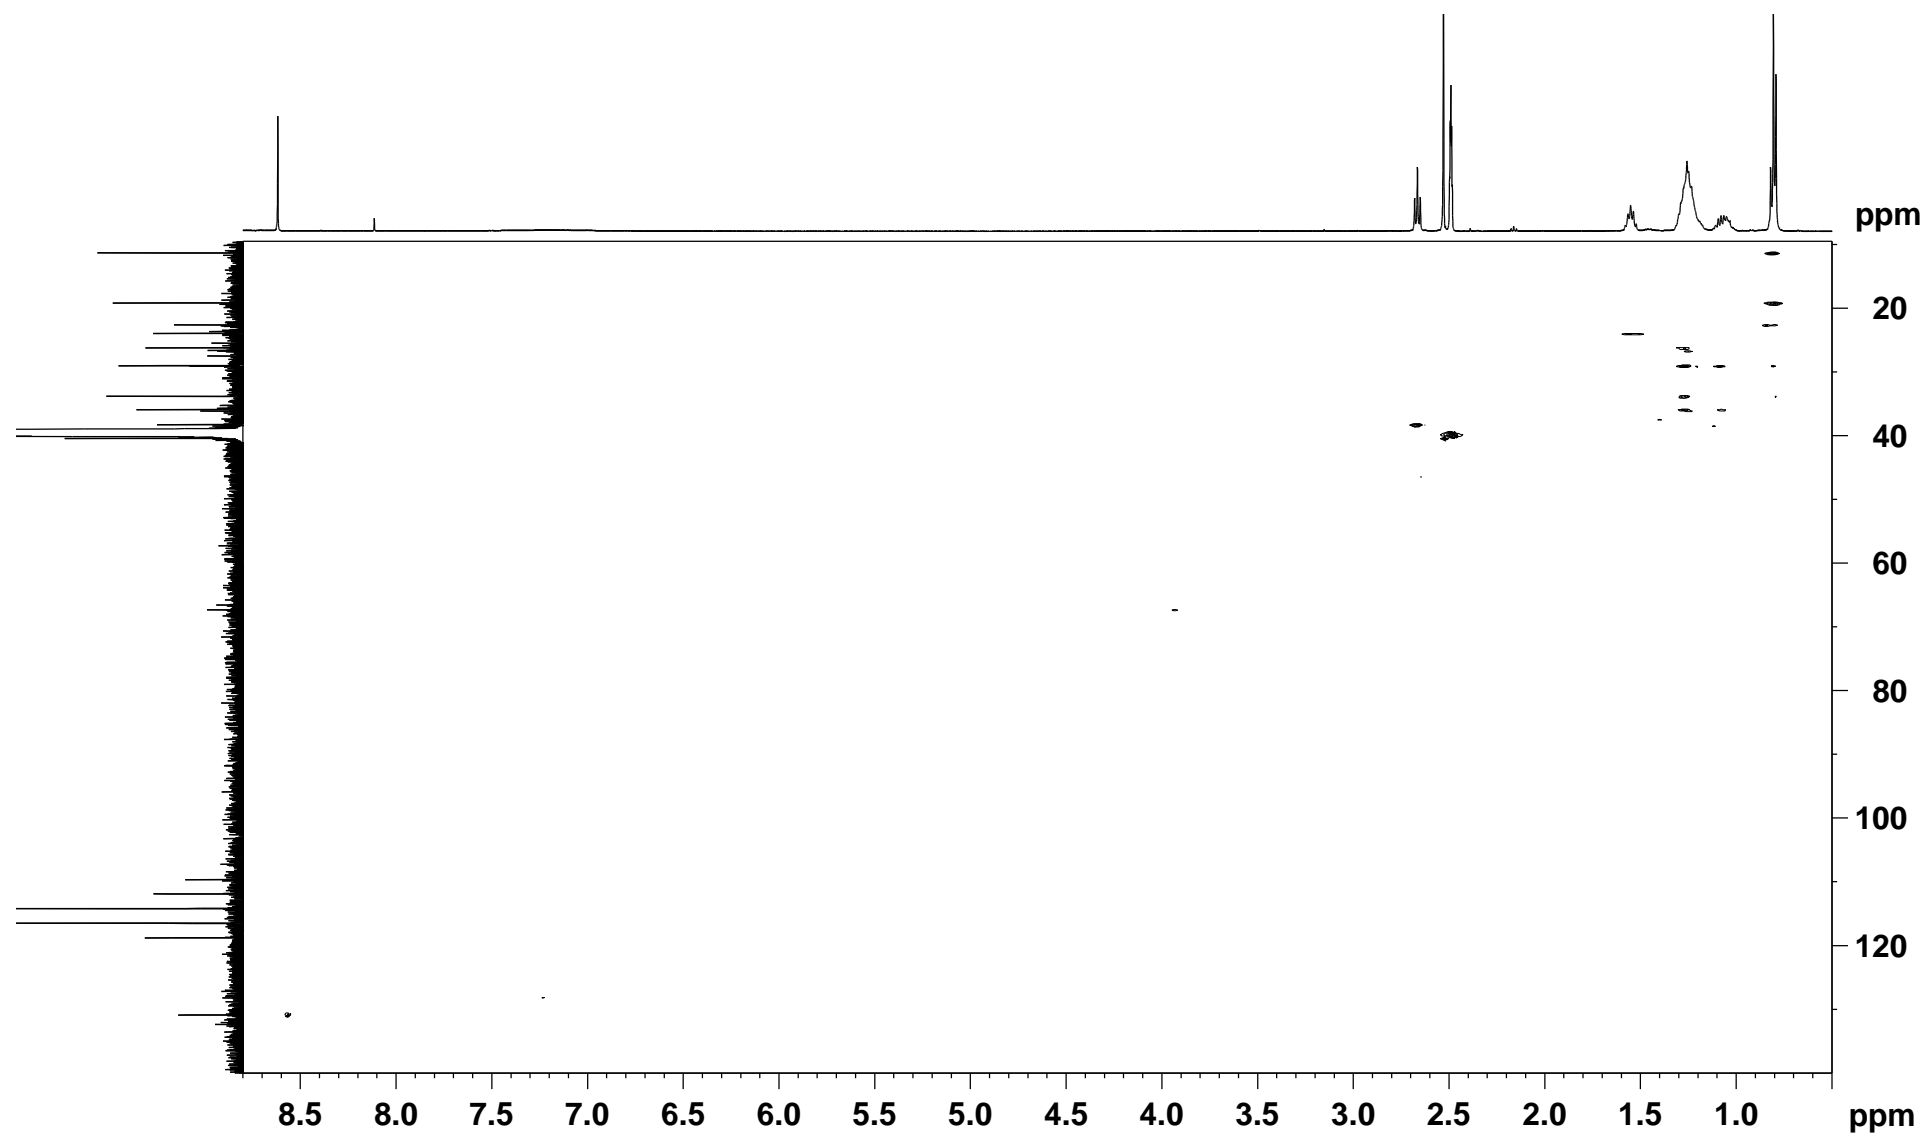

**Figure S7.** Coupled HSQC spectrum of **1** (500 MHz, DMSO-*d*<sub>6</sub> with TFA)

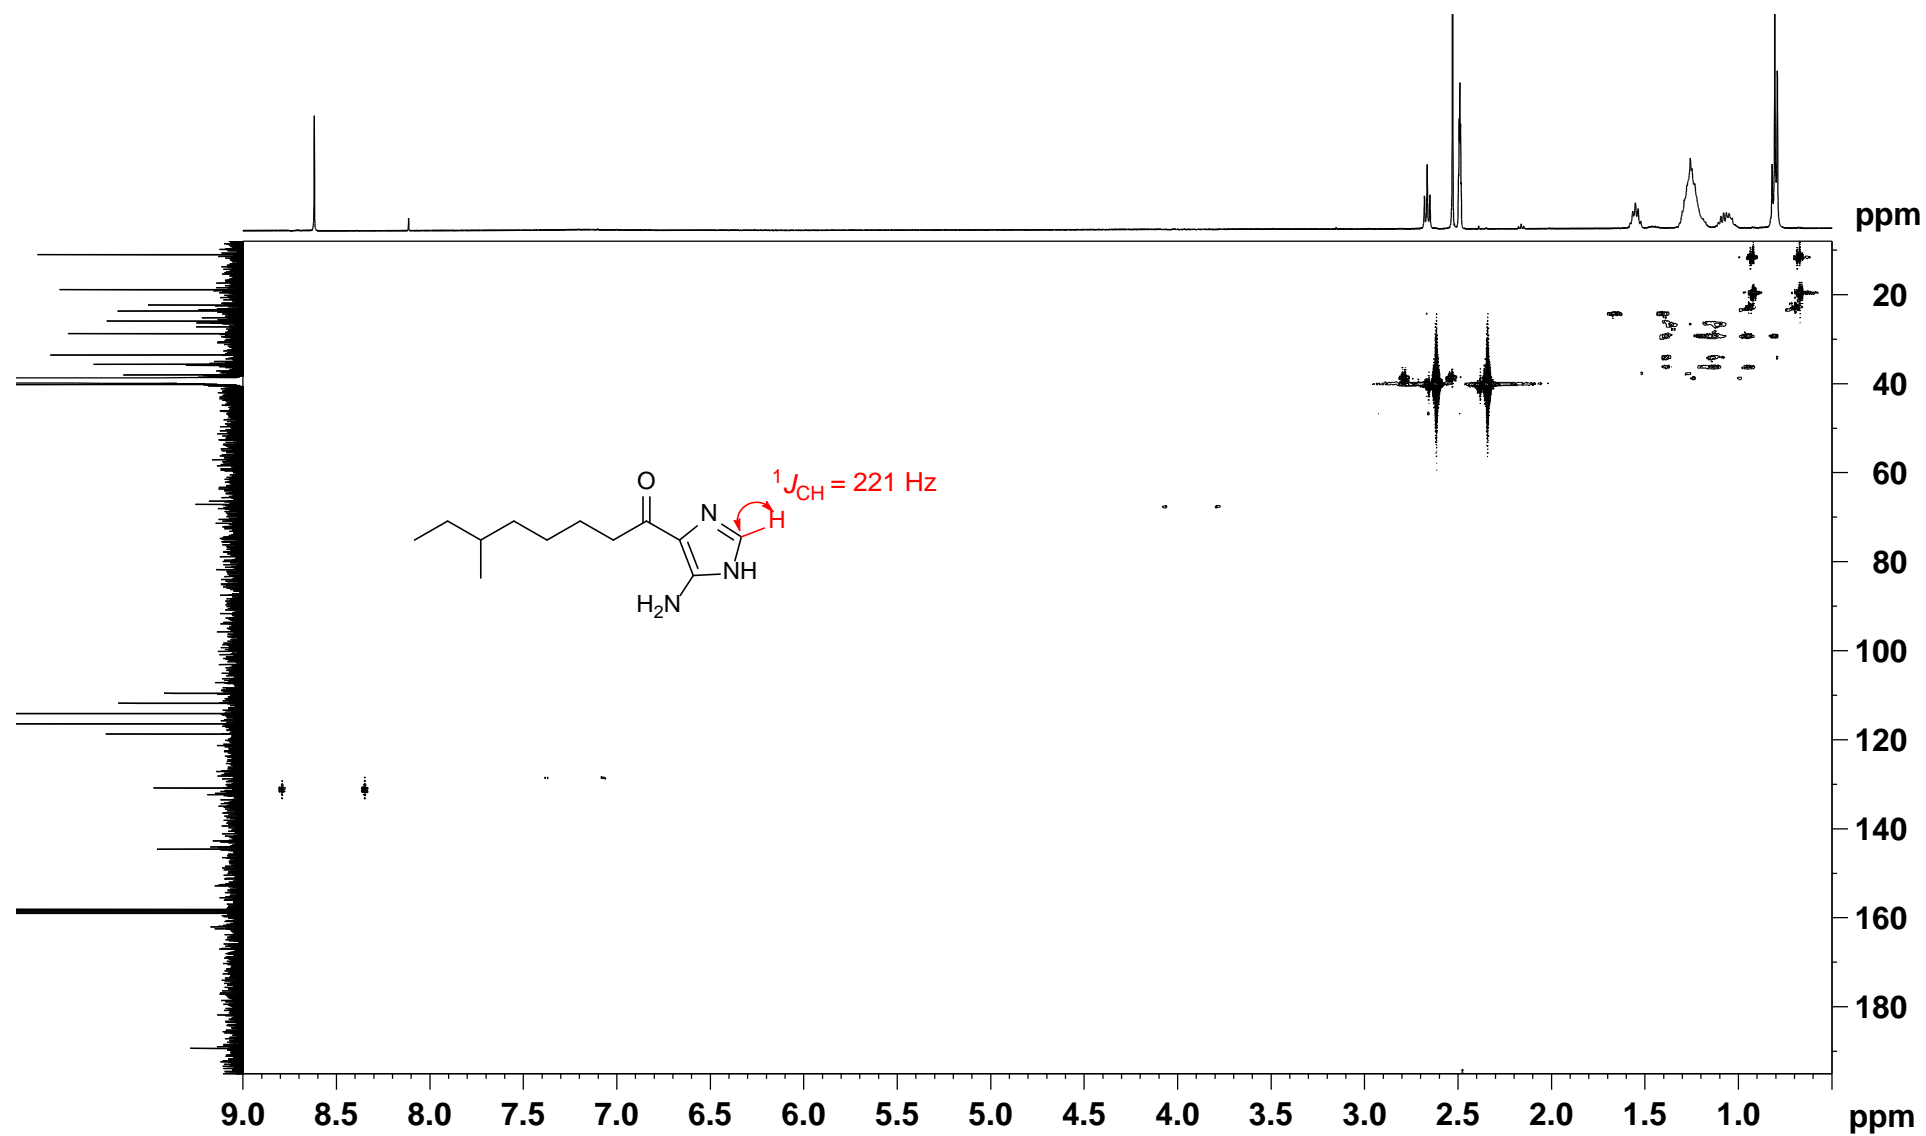

**Figure S8.** HMBC spectrum of **1** (500 MHz, DMSO-*d*<sub>6</sub> with TFA)

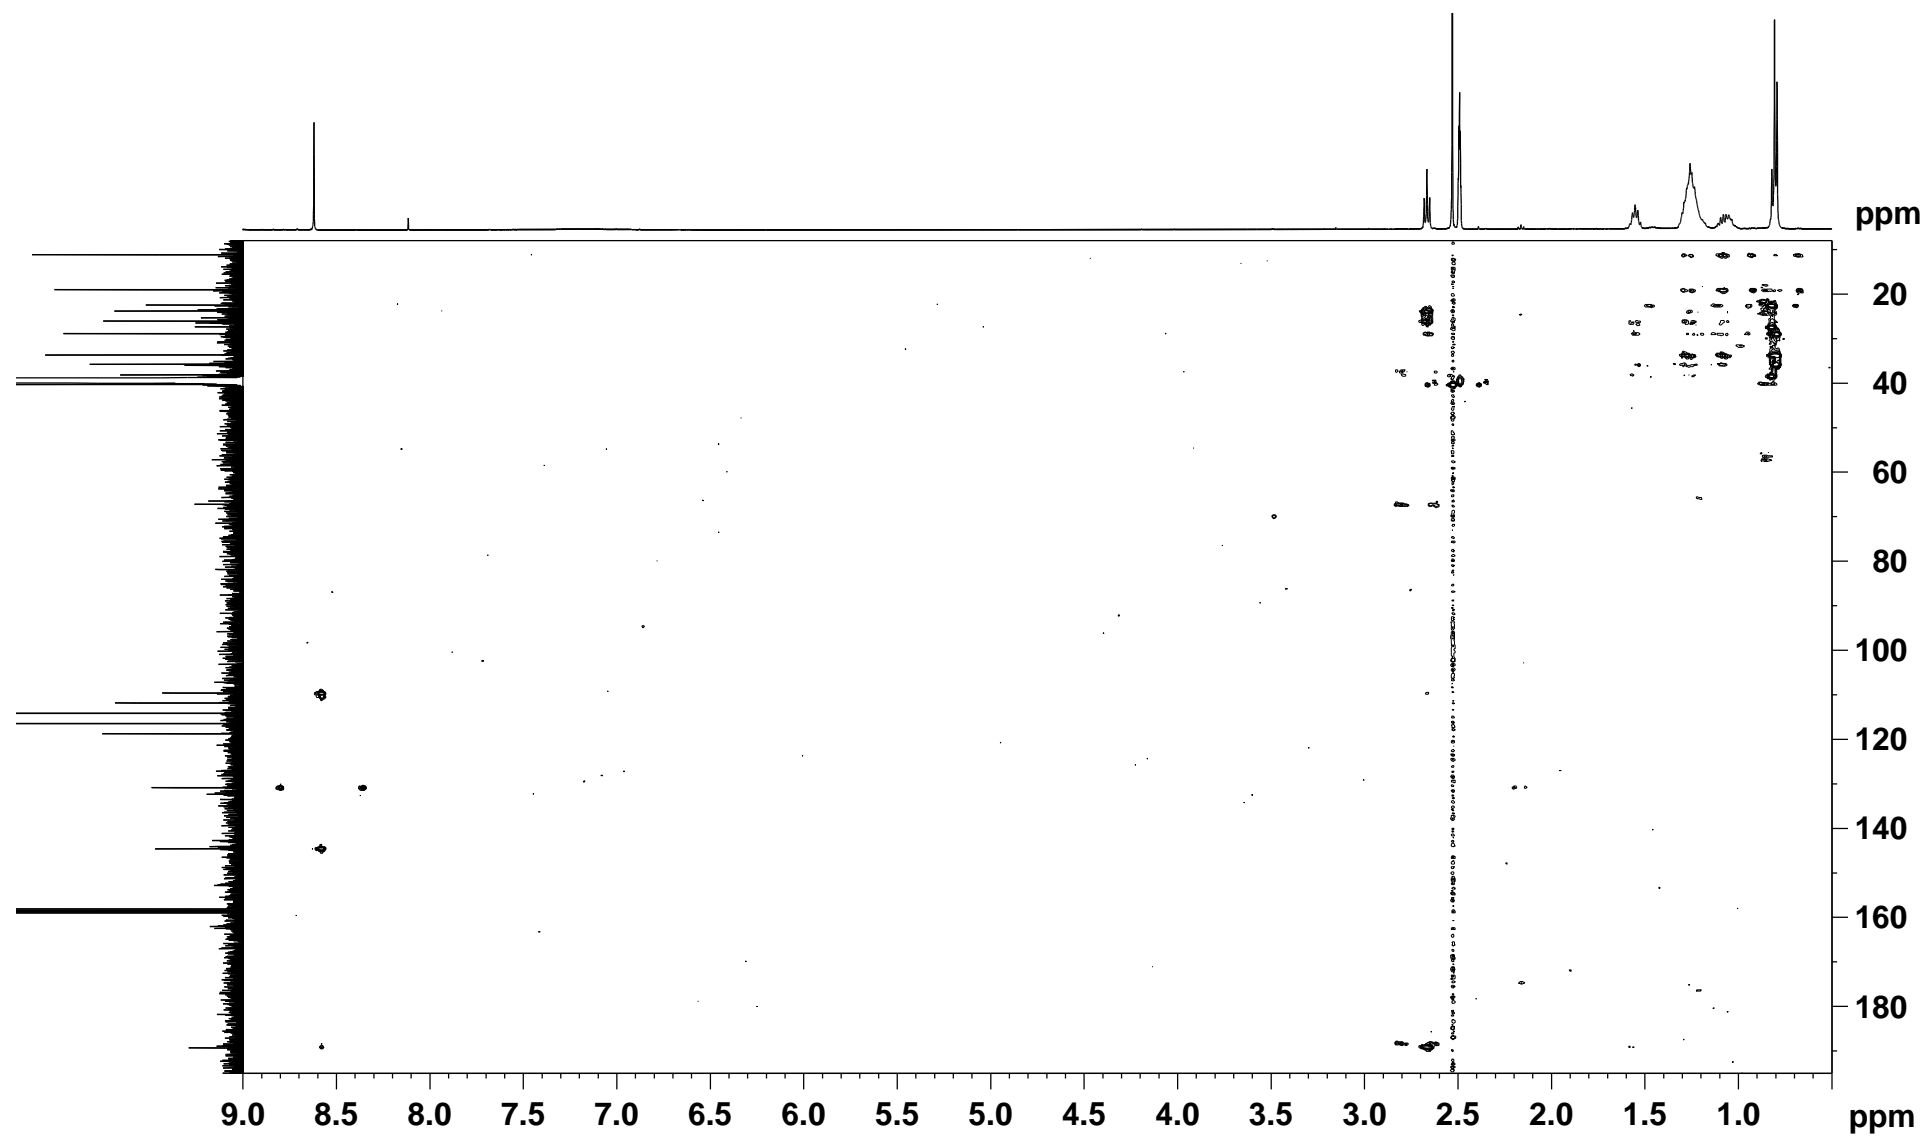

**Figure S9.** UV spectrum of nocarimidazole D (**2**)

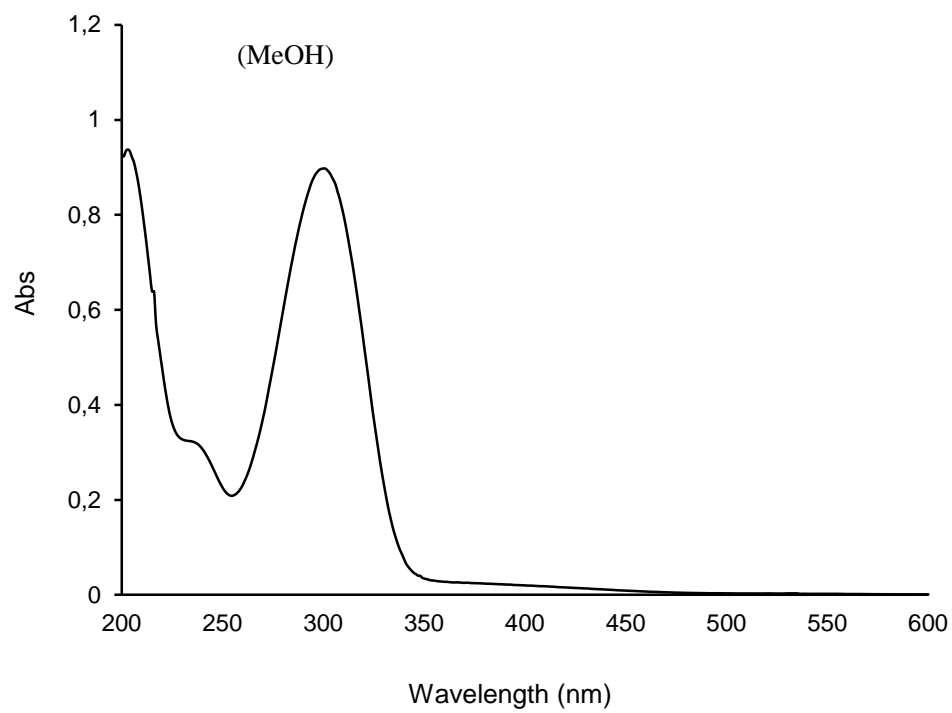

**Figure S10.** IR spectrum of **2**

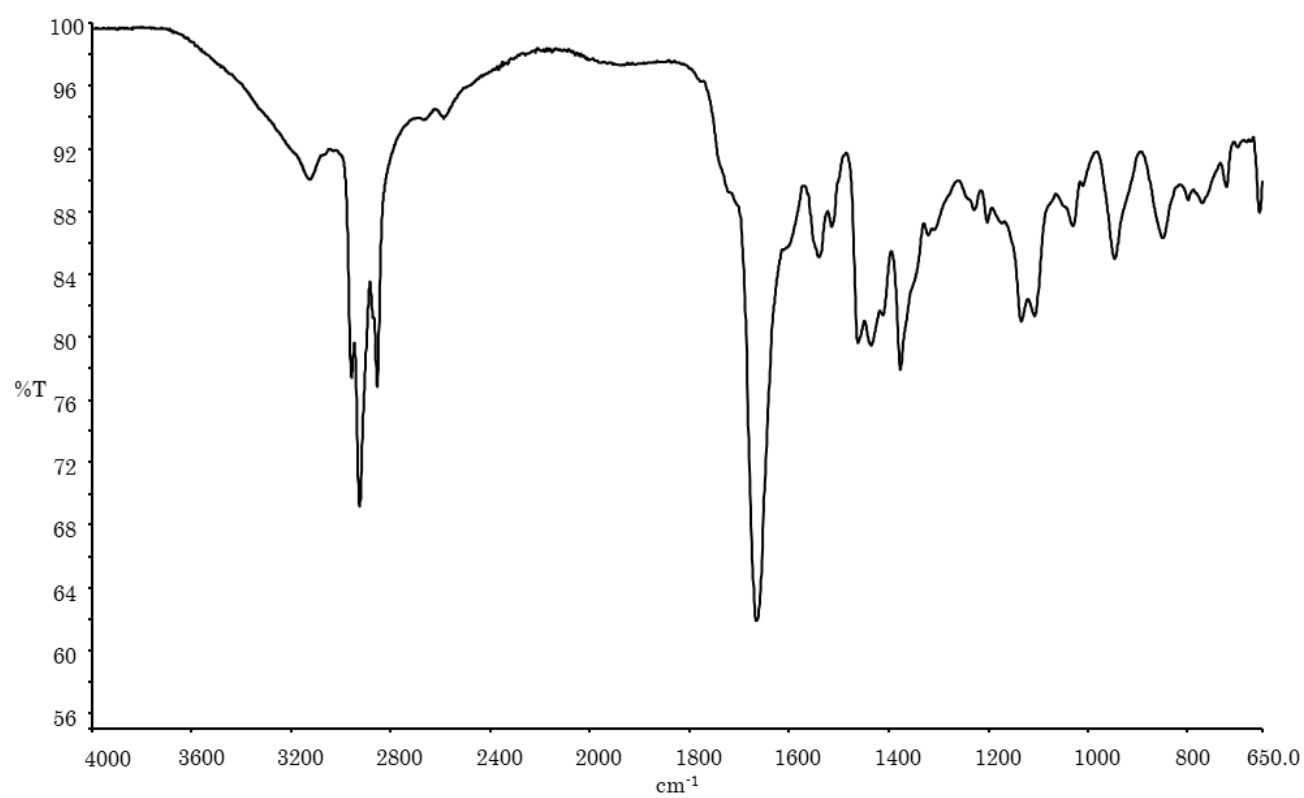



**Figure S11.**  $^1\text{H}$  NMR spectrum of **2** (500 MHz,  $\text{DMSO-}d_6$  with TFA)

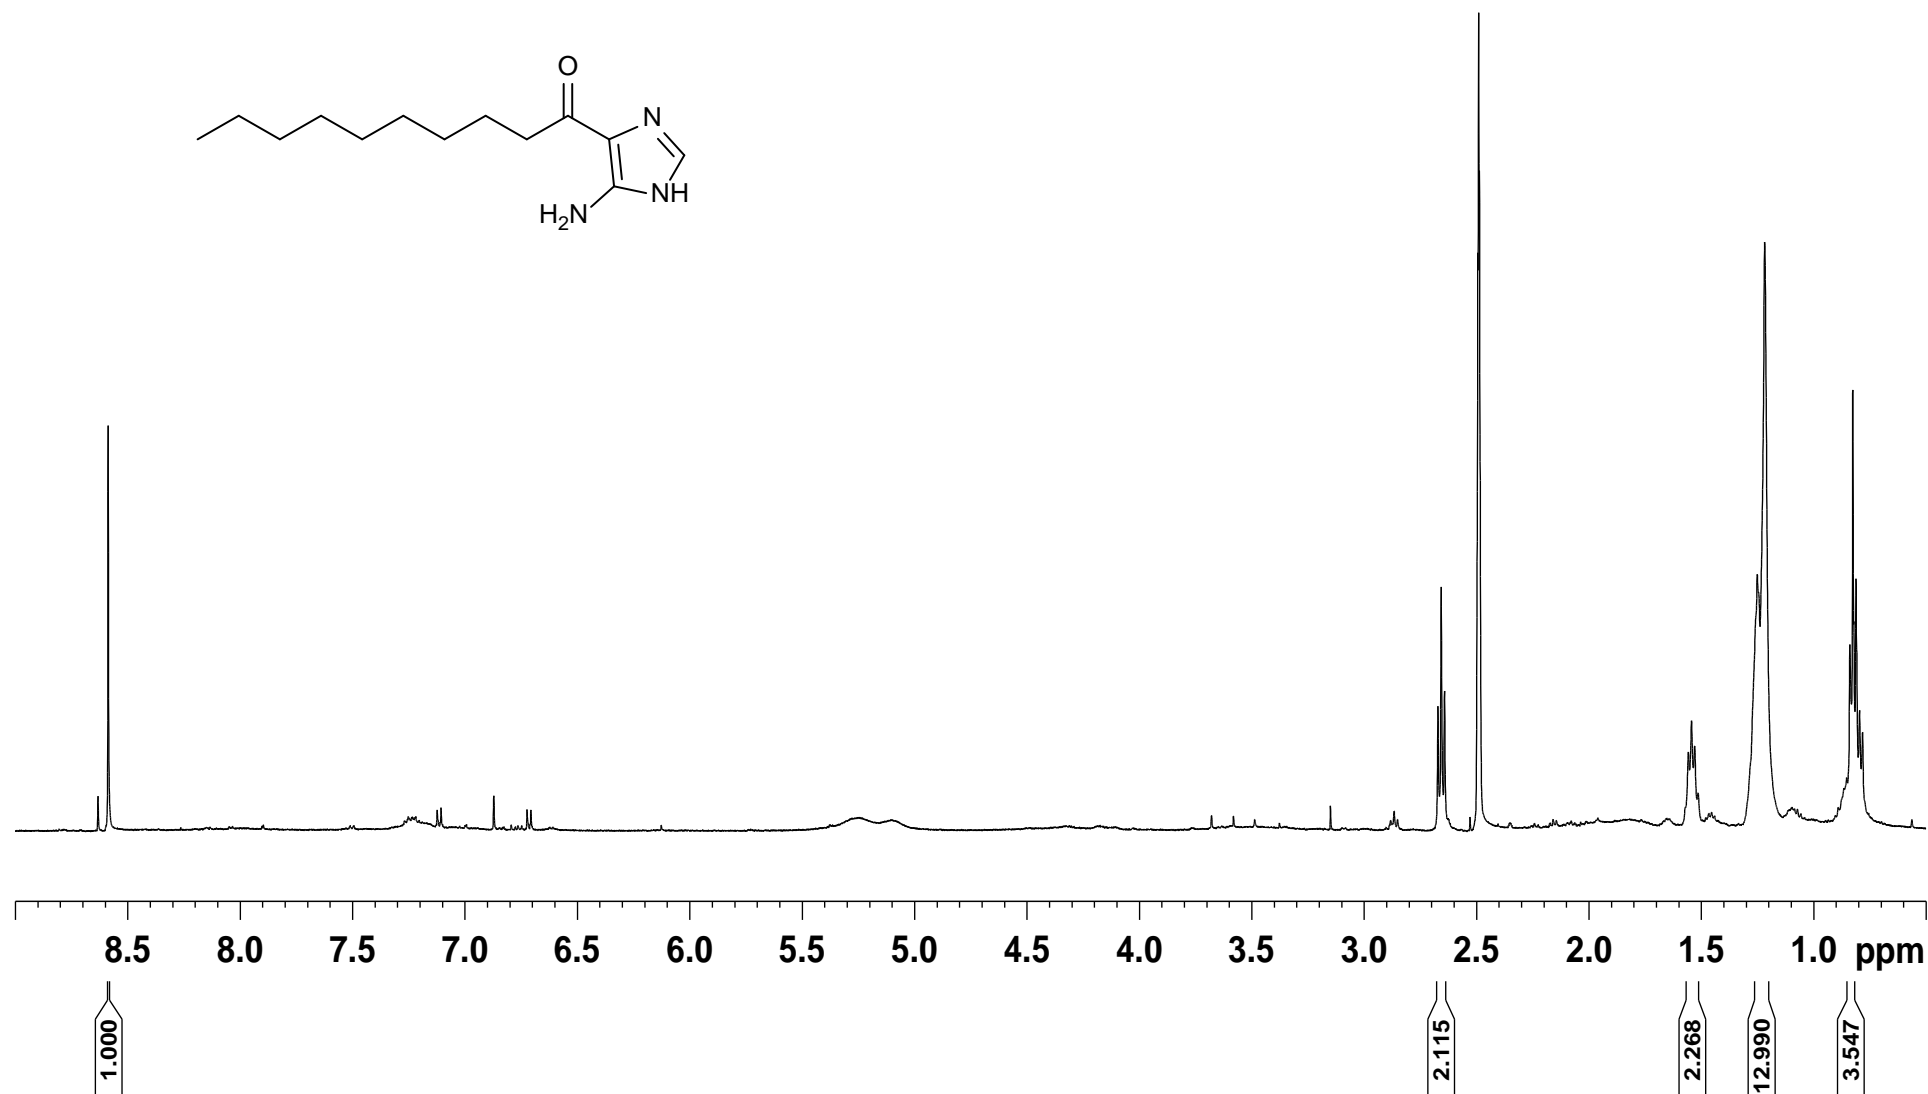

**Figure S12.**  $^{13}\text{C}$  NMR spectrum of **2** (125 MHz,  $\text{DMSO-}d_6$  with TFA)

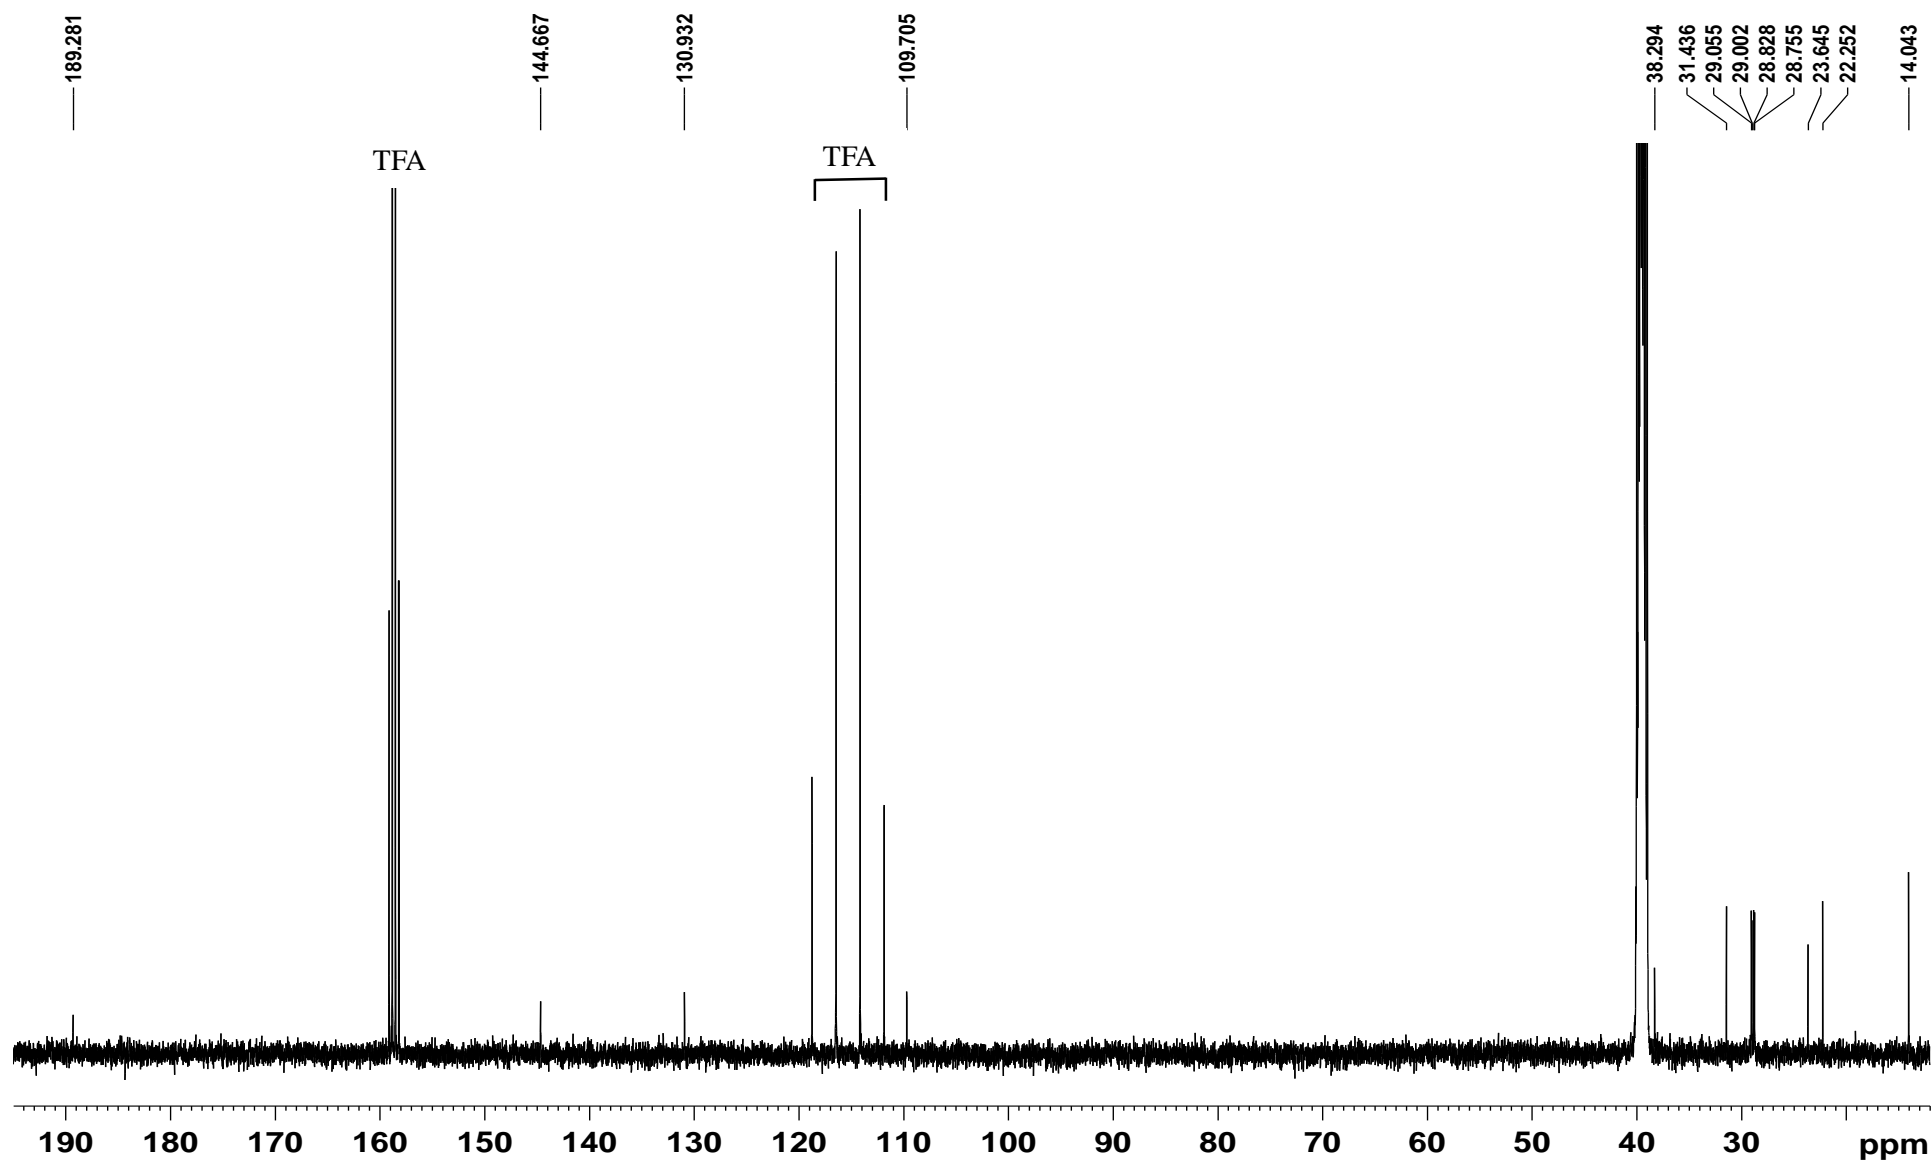

**Figure S13.** COSY spectrum of **2** (500 MHz, DMSO-*d*<sub>6</sub> with TFA)

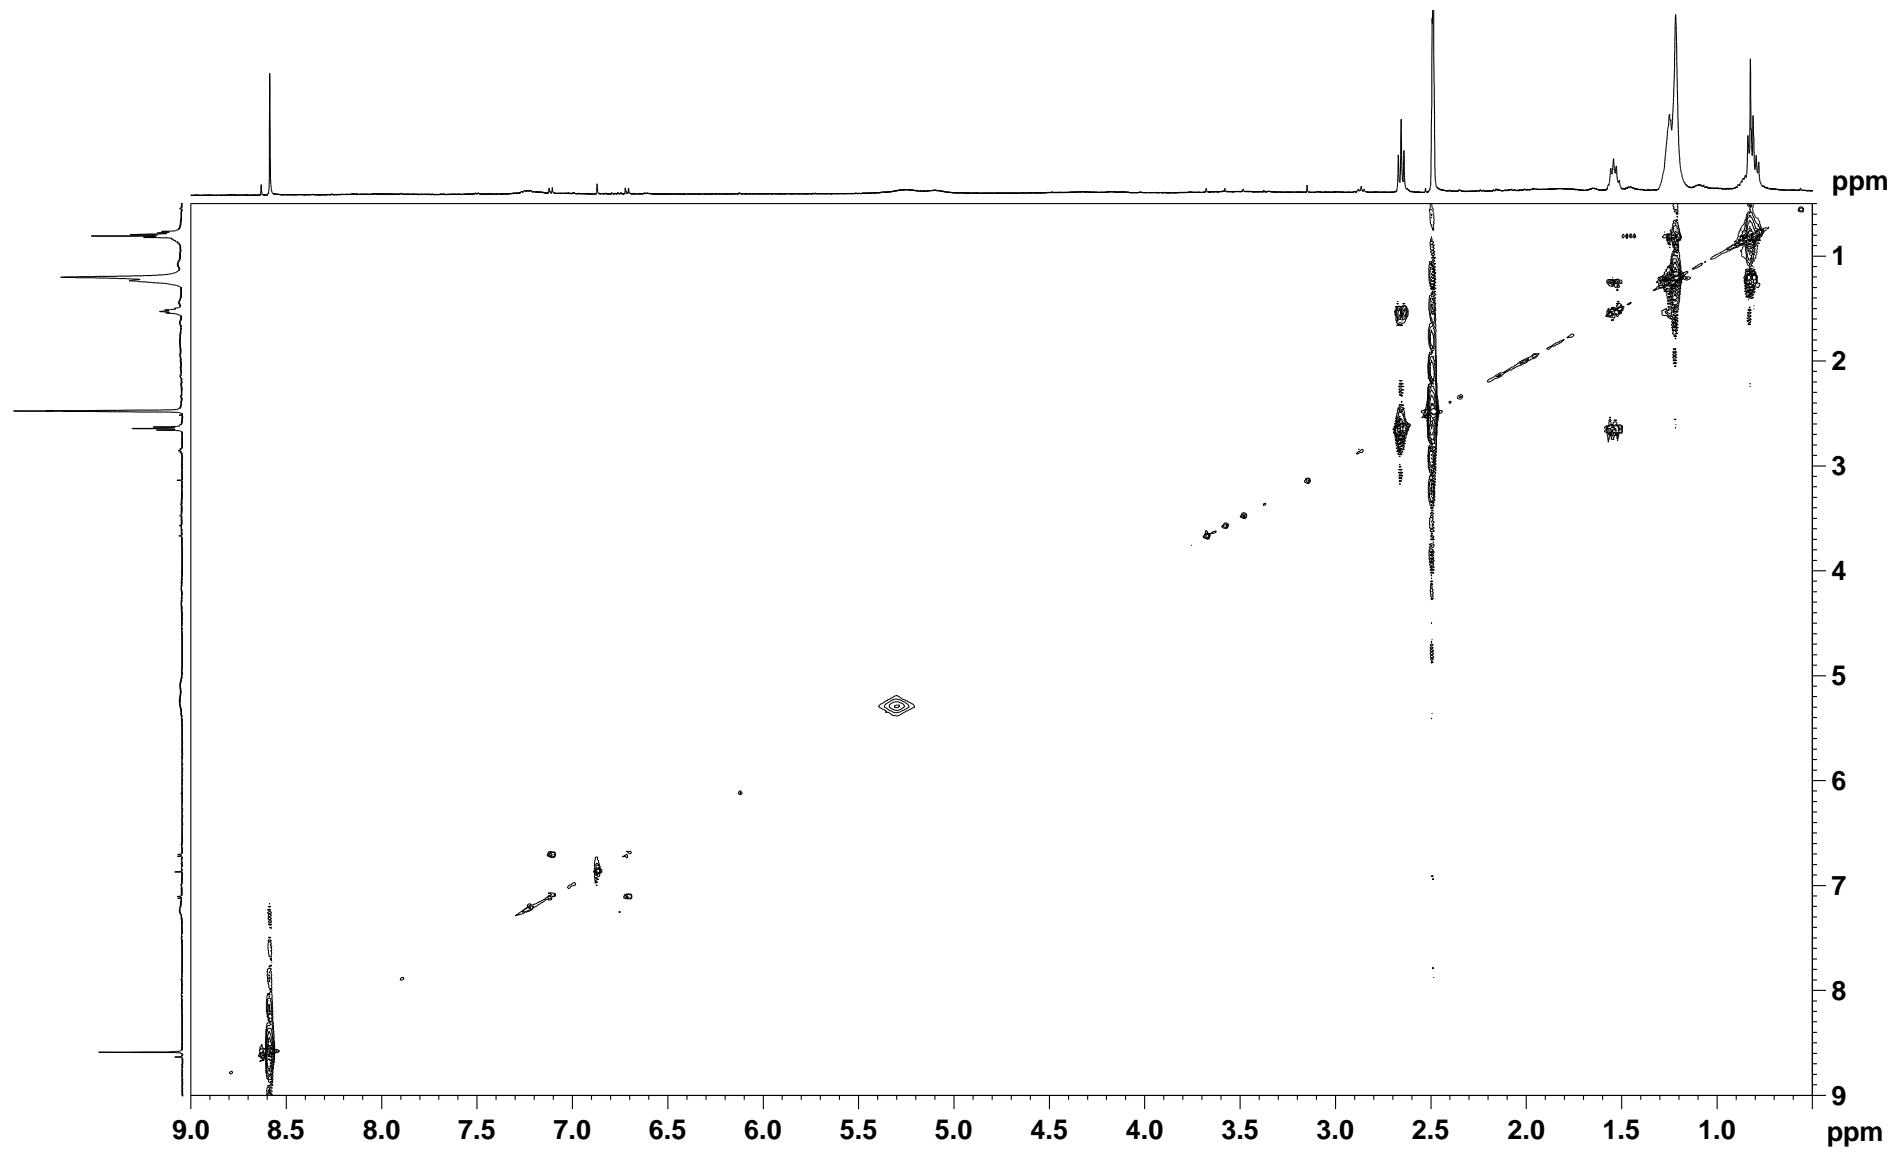

**Figure S14.** HSQC spectrum of **2** (500 MHz, DMSO-*d*<sub>6</sub> with TFA

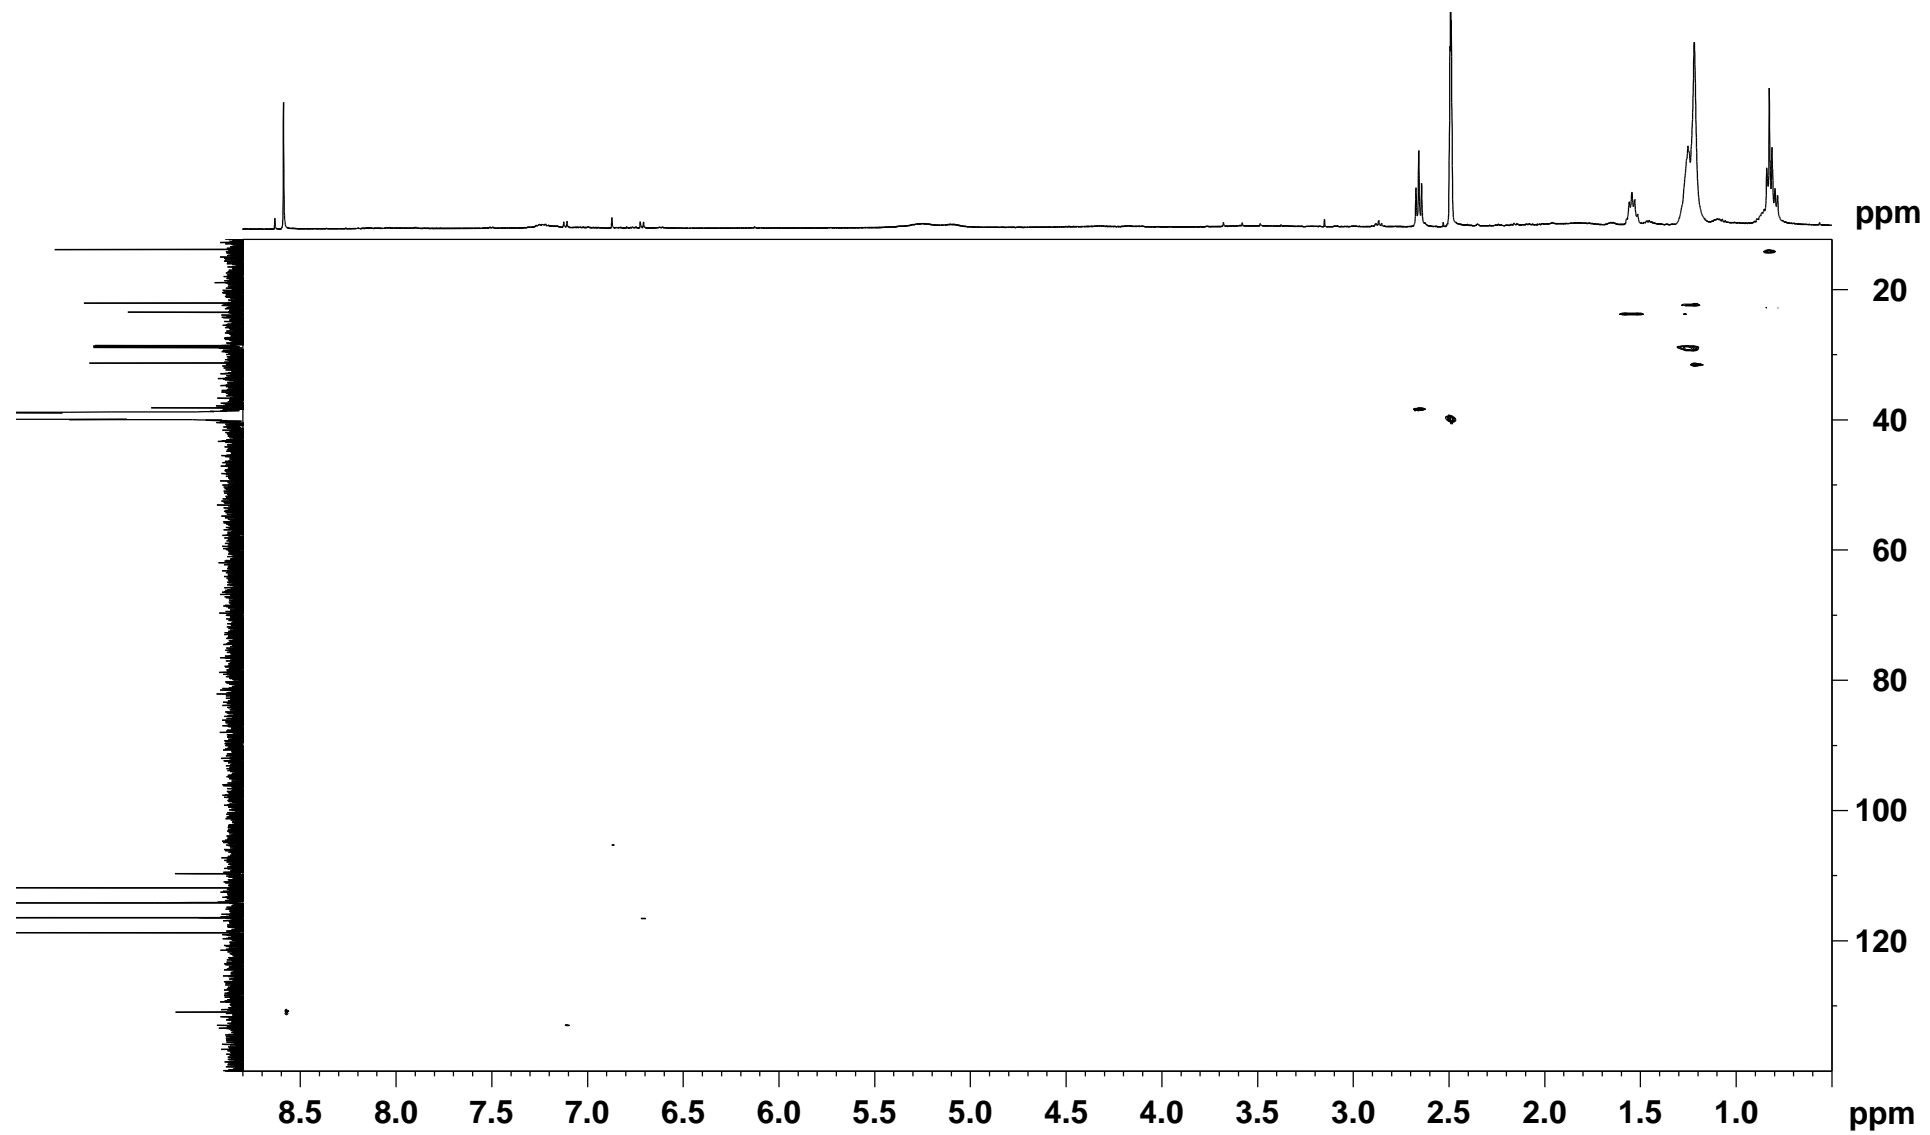

**Figure S15.** HMBC spectrum of **2** (500 MHz, DMSO-*d*<sub>6</sub> with TFA)

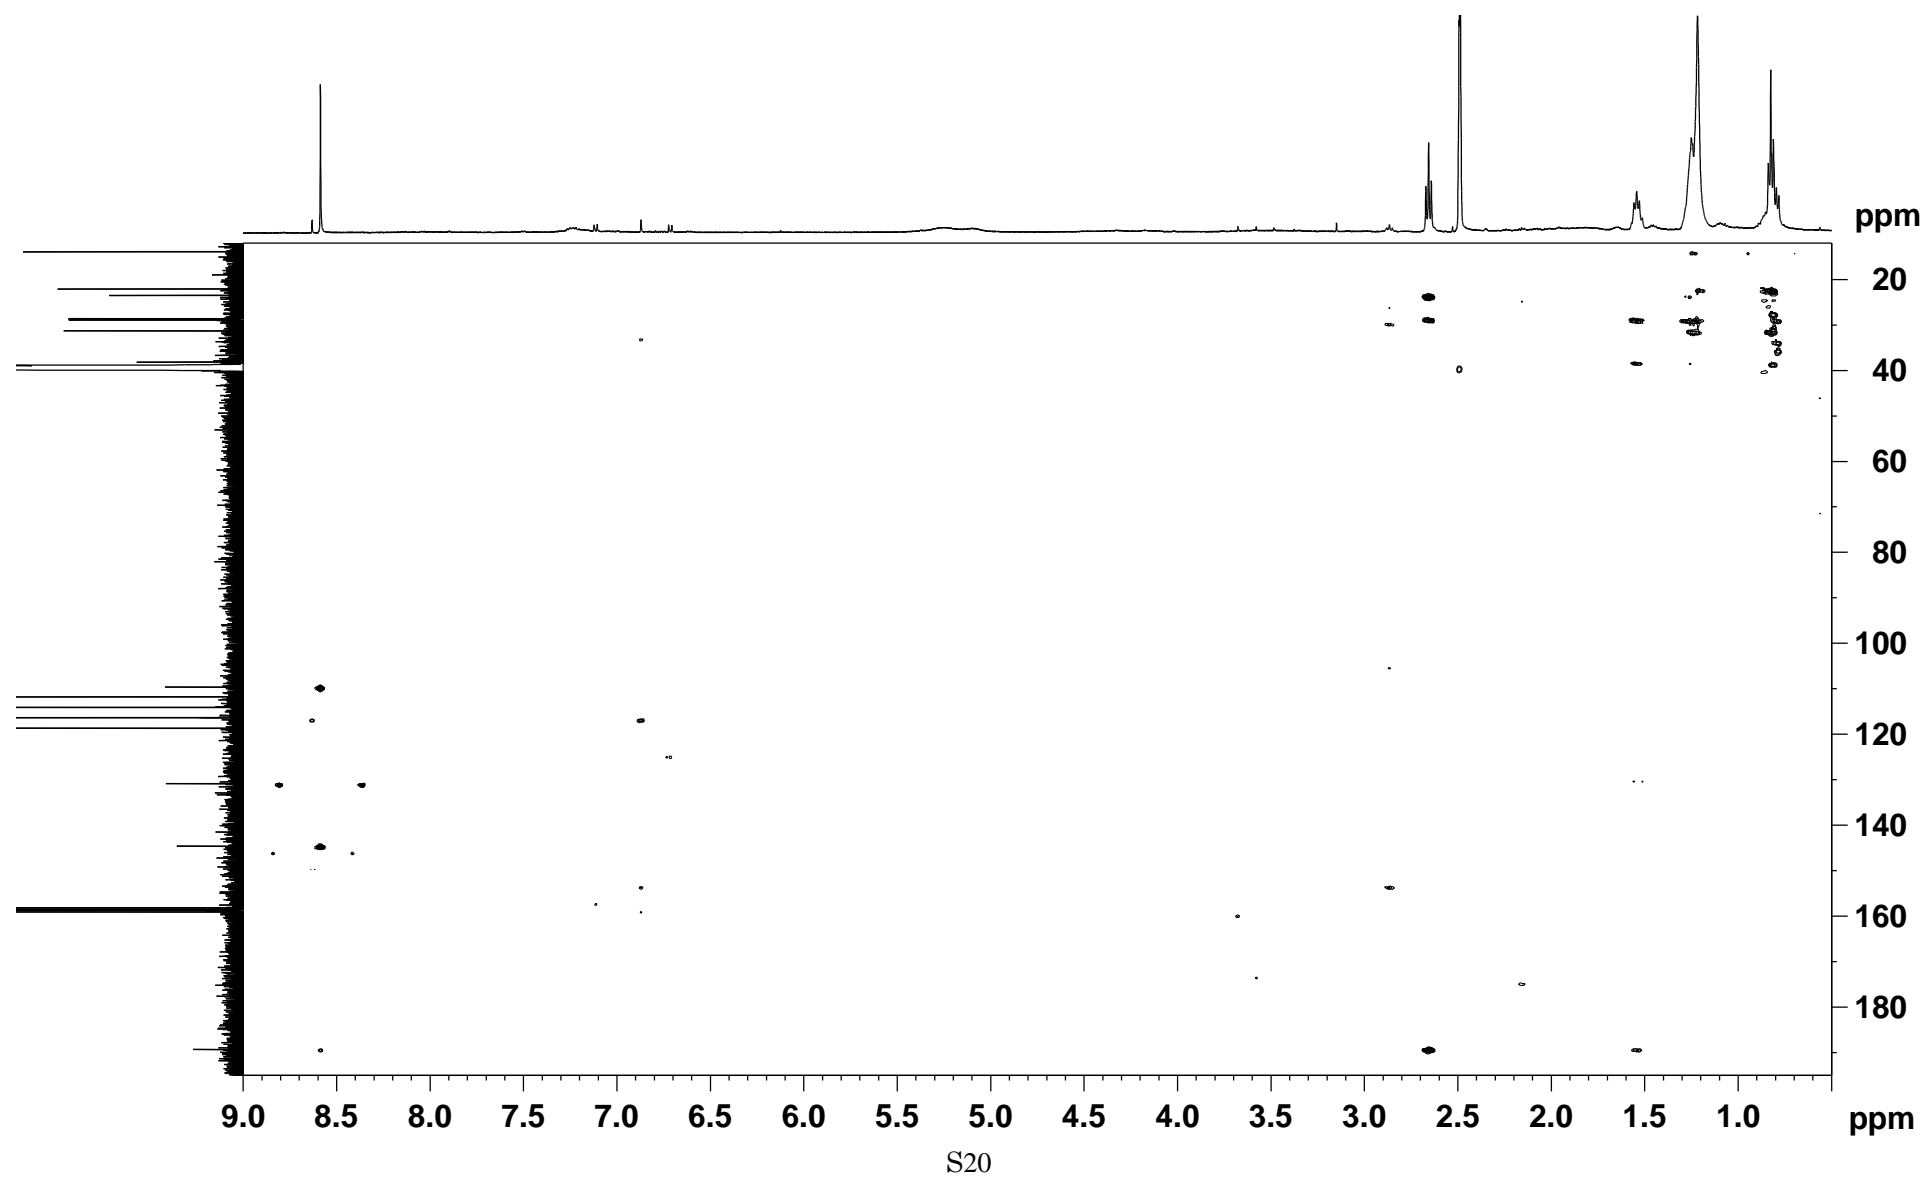

**Figure S16.**  $^1\text{H}$  NMR spectrum of **3** (500 MHz,  $\text{DMSO-}d_6$  with TFA)

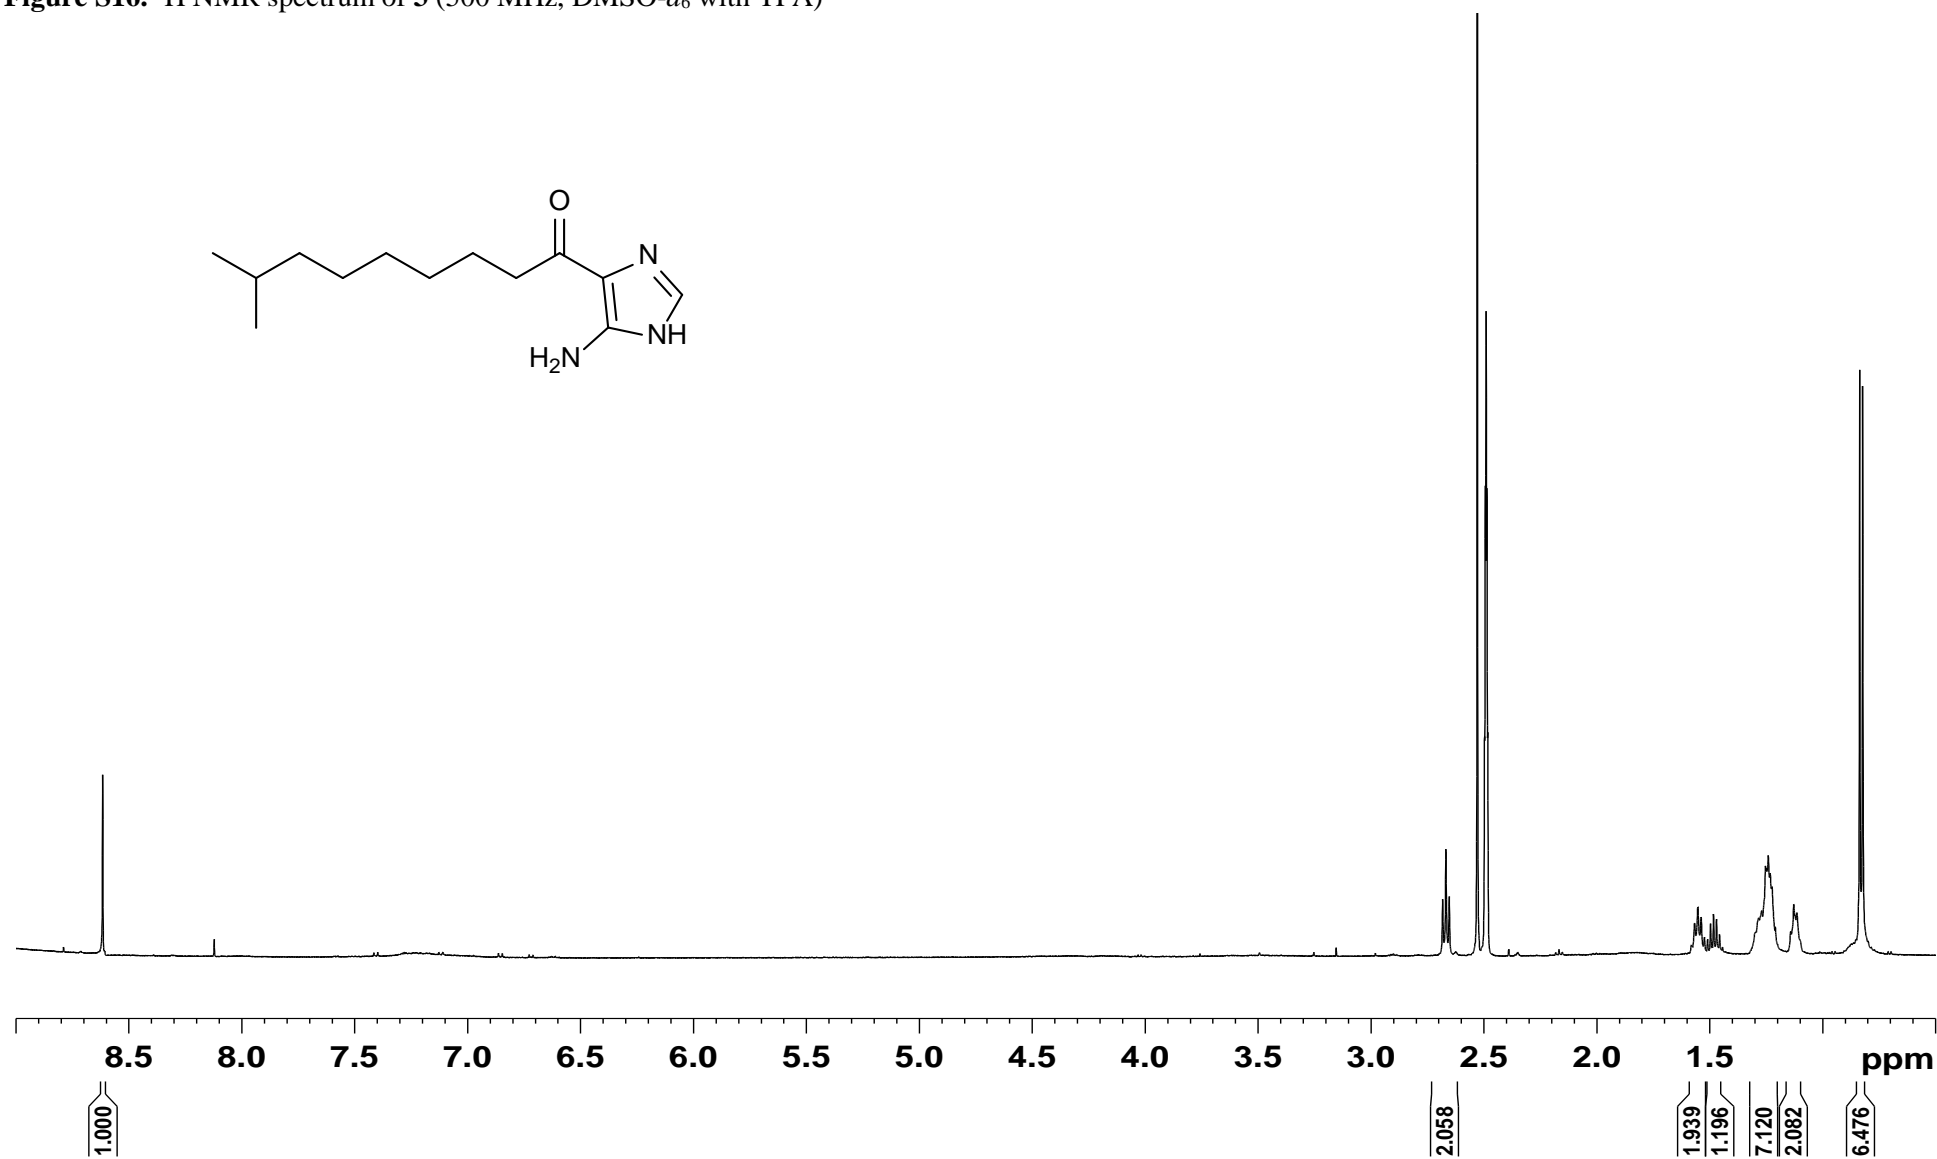

**Figure S17.**  $^{13}\text{C}$  NMR spectrum of **3** (125 MHz,  $\text{DMSO}-d_6$  with TFA)

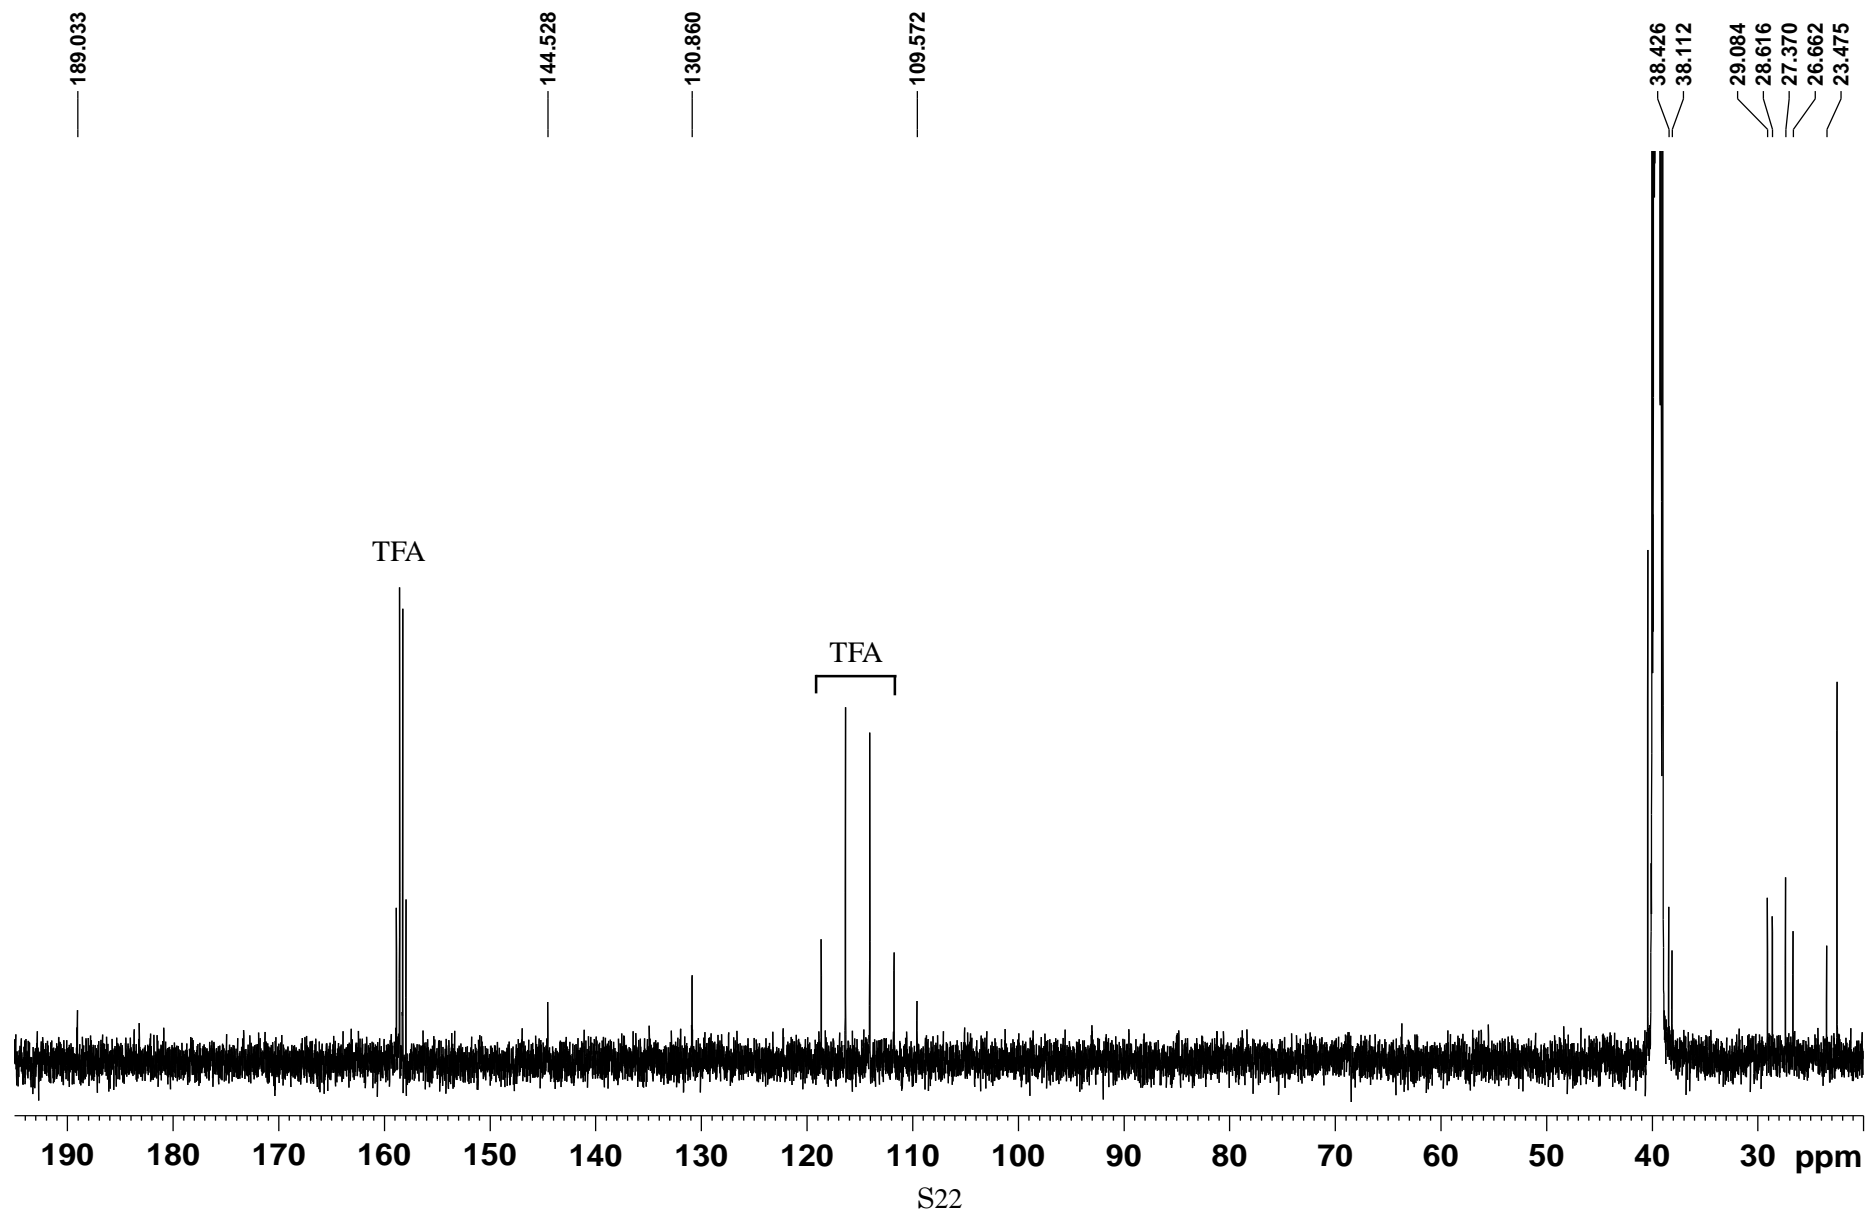

**Figure S18.**  $^1\text{H}$  NMR spectrum of **4** (500 MHz,  $\text{DMSO}-d_6$  with TFA)

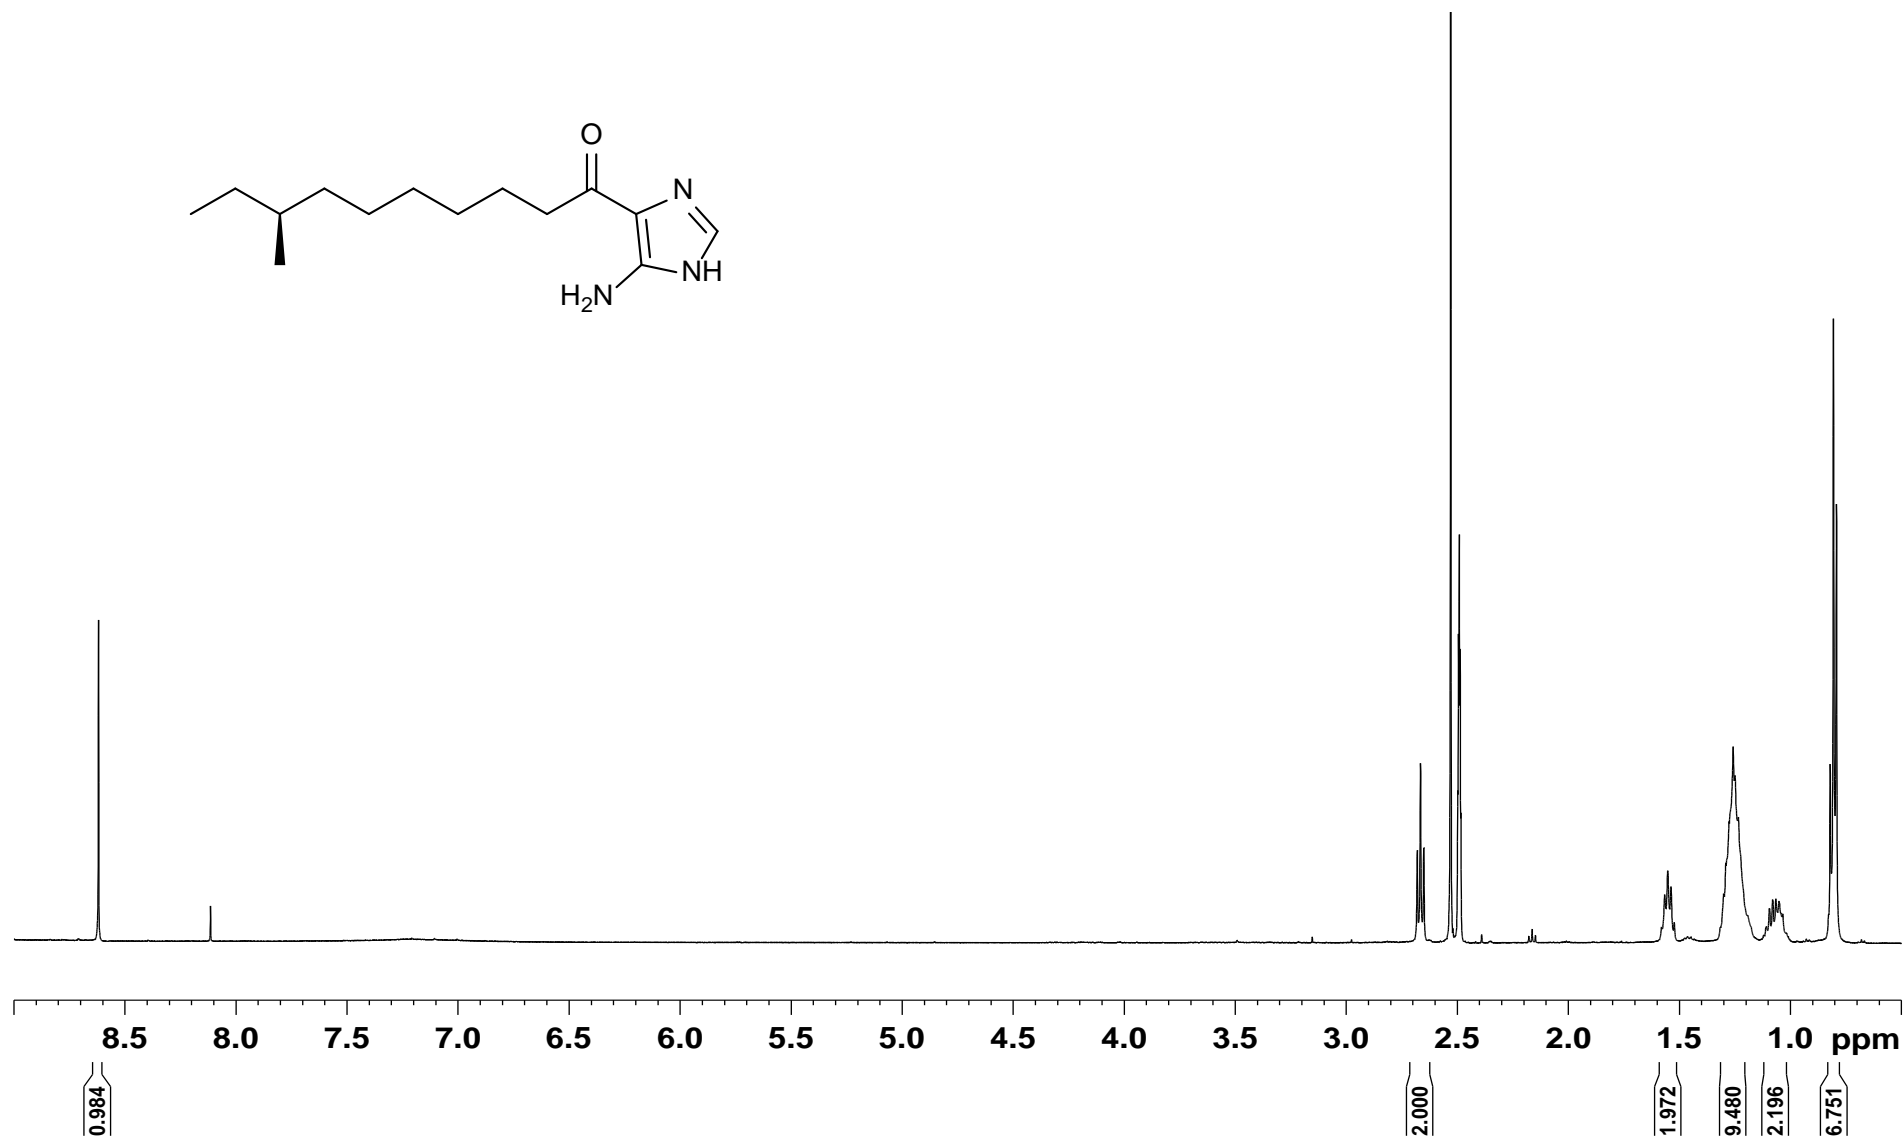



**Figure S19.**  $^{13}\text{C}$  NMR spectrum of **4** (125 MHz,  $\text{DMSO}-d_6$  with TFA)

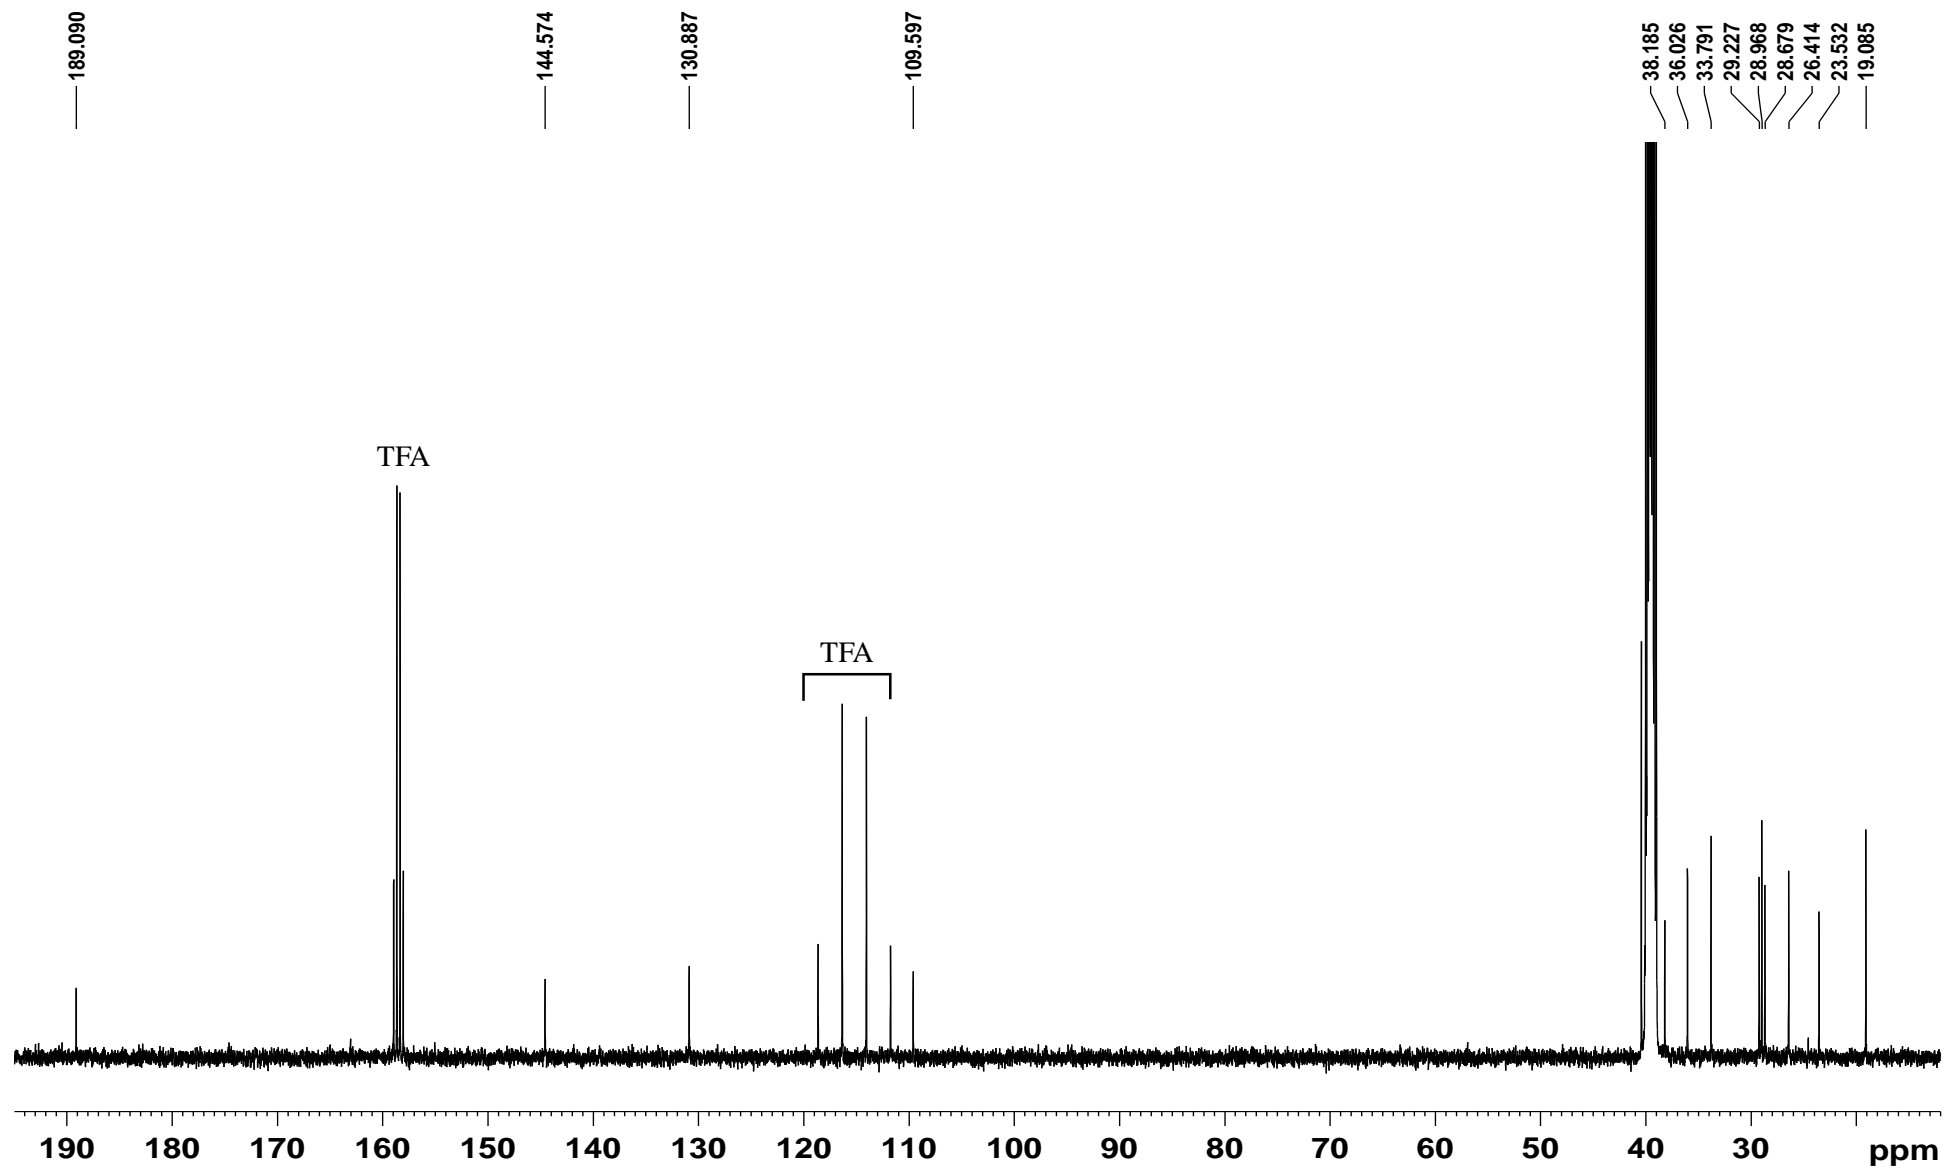

**Figure S20.**  $^1\text{H}$  NMR spectrum of **5** (500 MHz,  $\text{DMSO}-d_6$  with TFA)

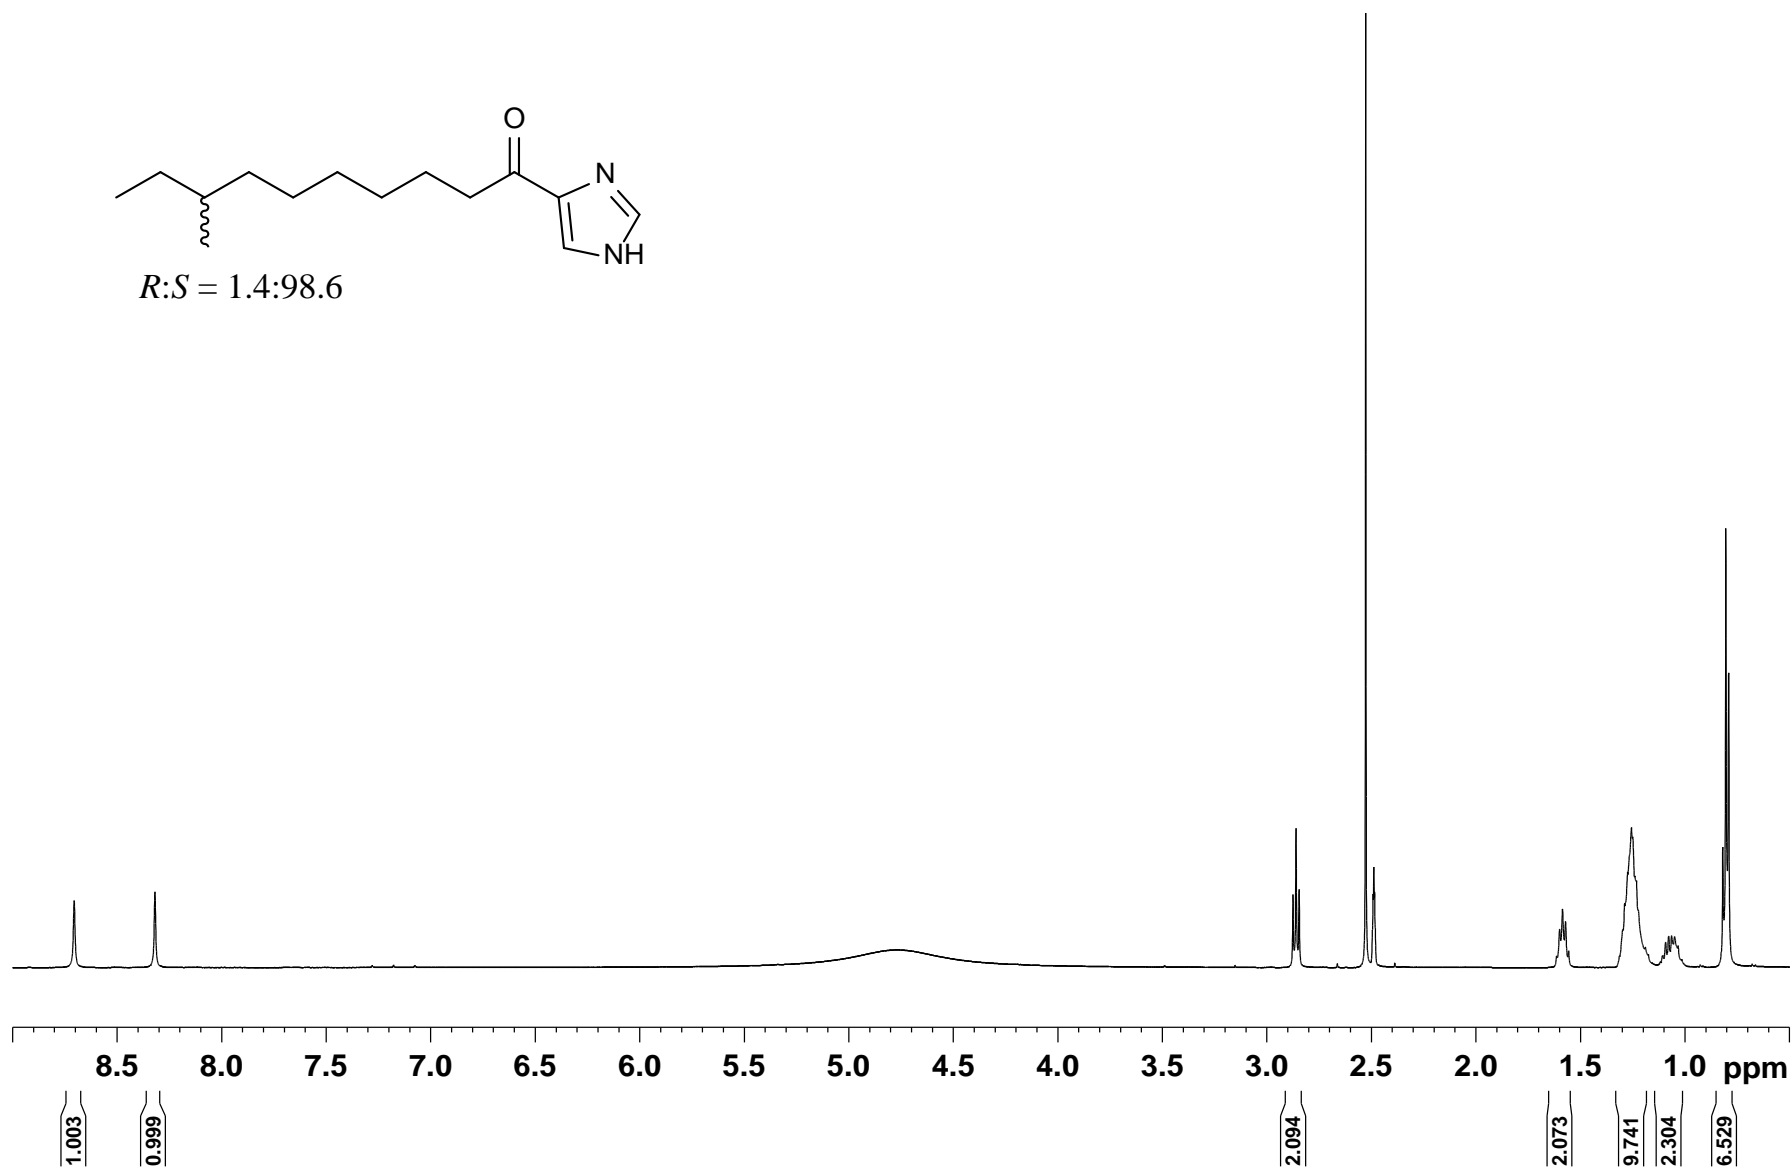

**Figure S21.**  $^{13}\text{C}$  NMR spectrum of **5** (125 MHz,  $\text{DMSO}-d_6$  with TFA)

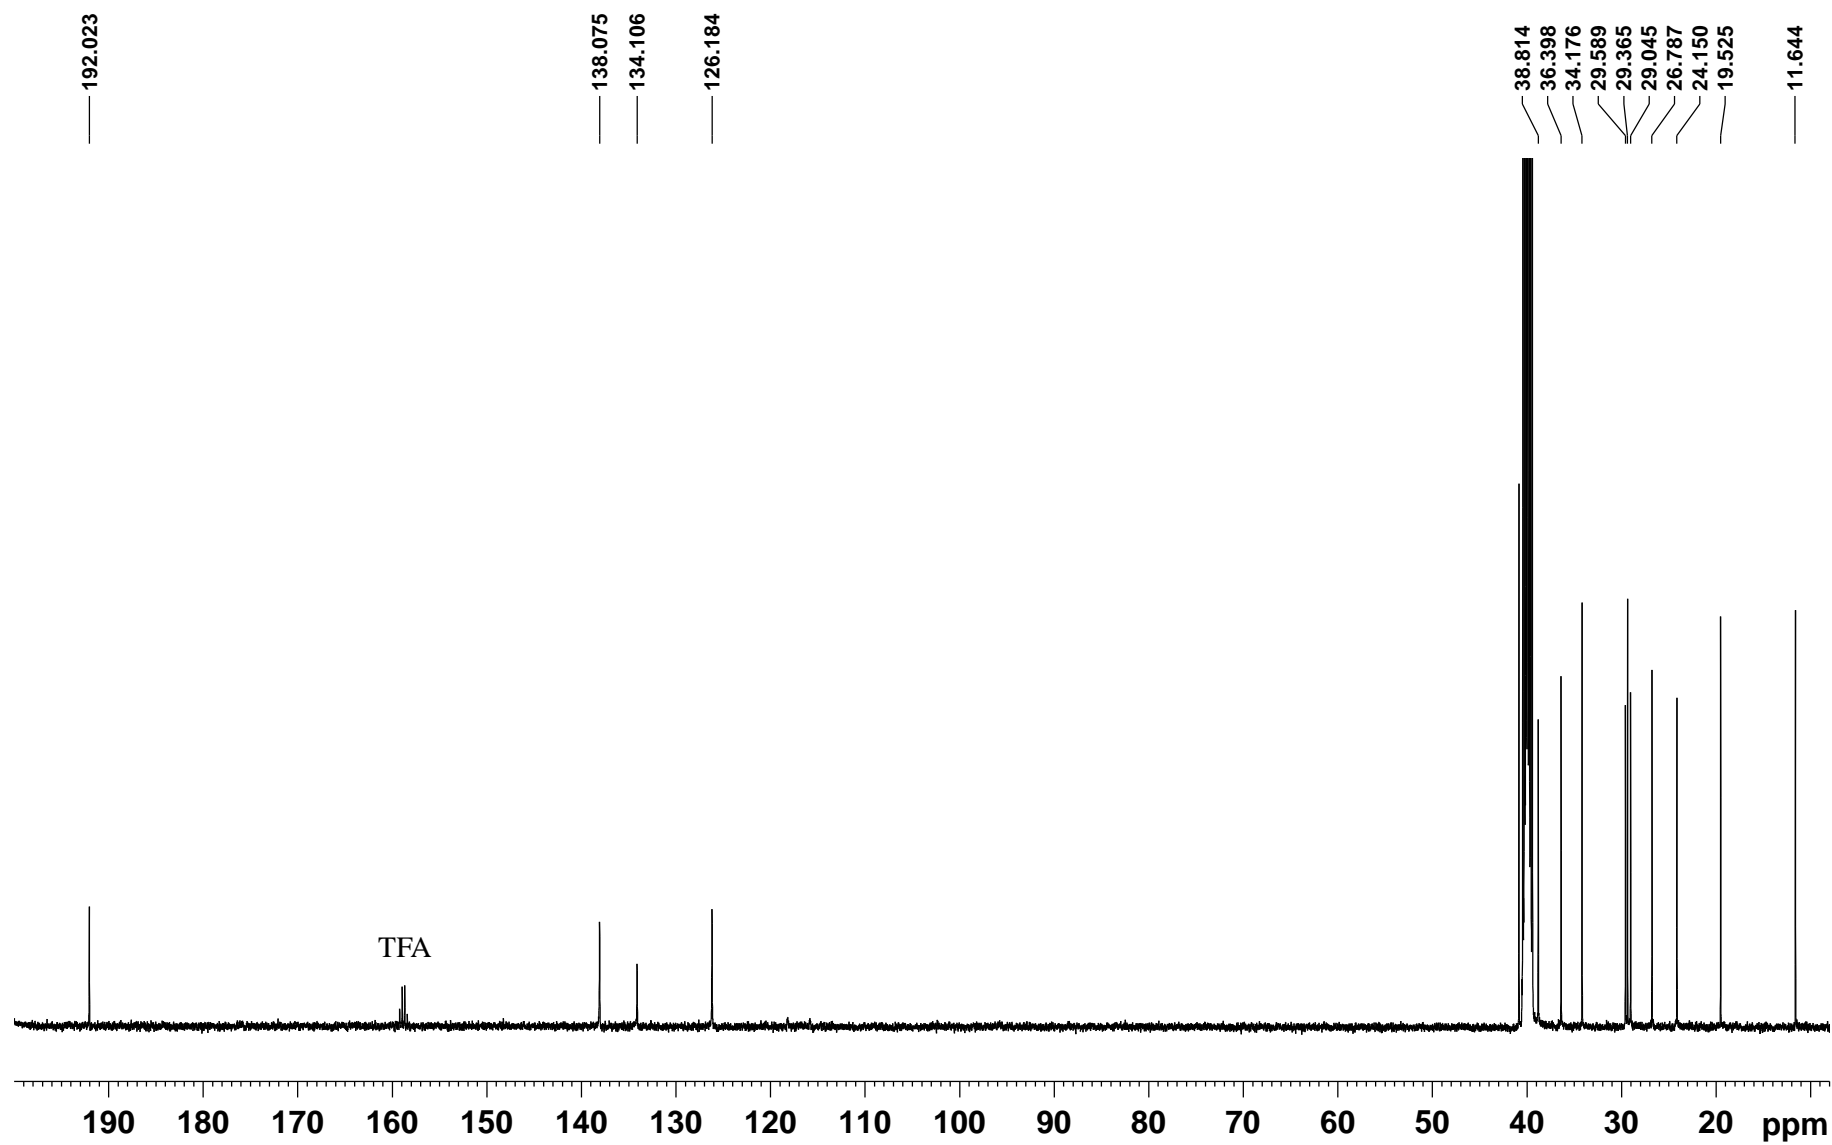

**Figure S22.**  $^1J_{\text{CH}}$  HSQC spectrum of **5** (500 MHz, DMSO- $d_6$  with TFA)

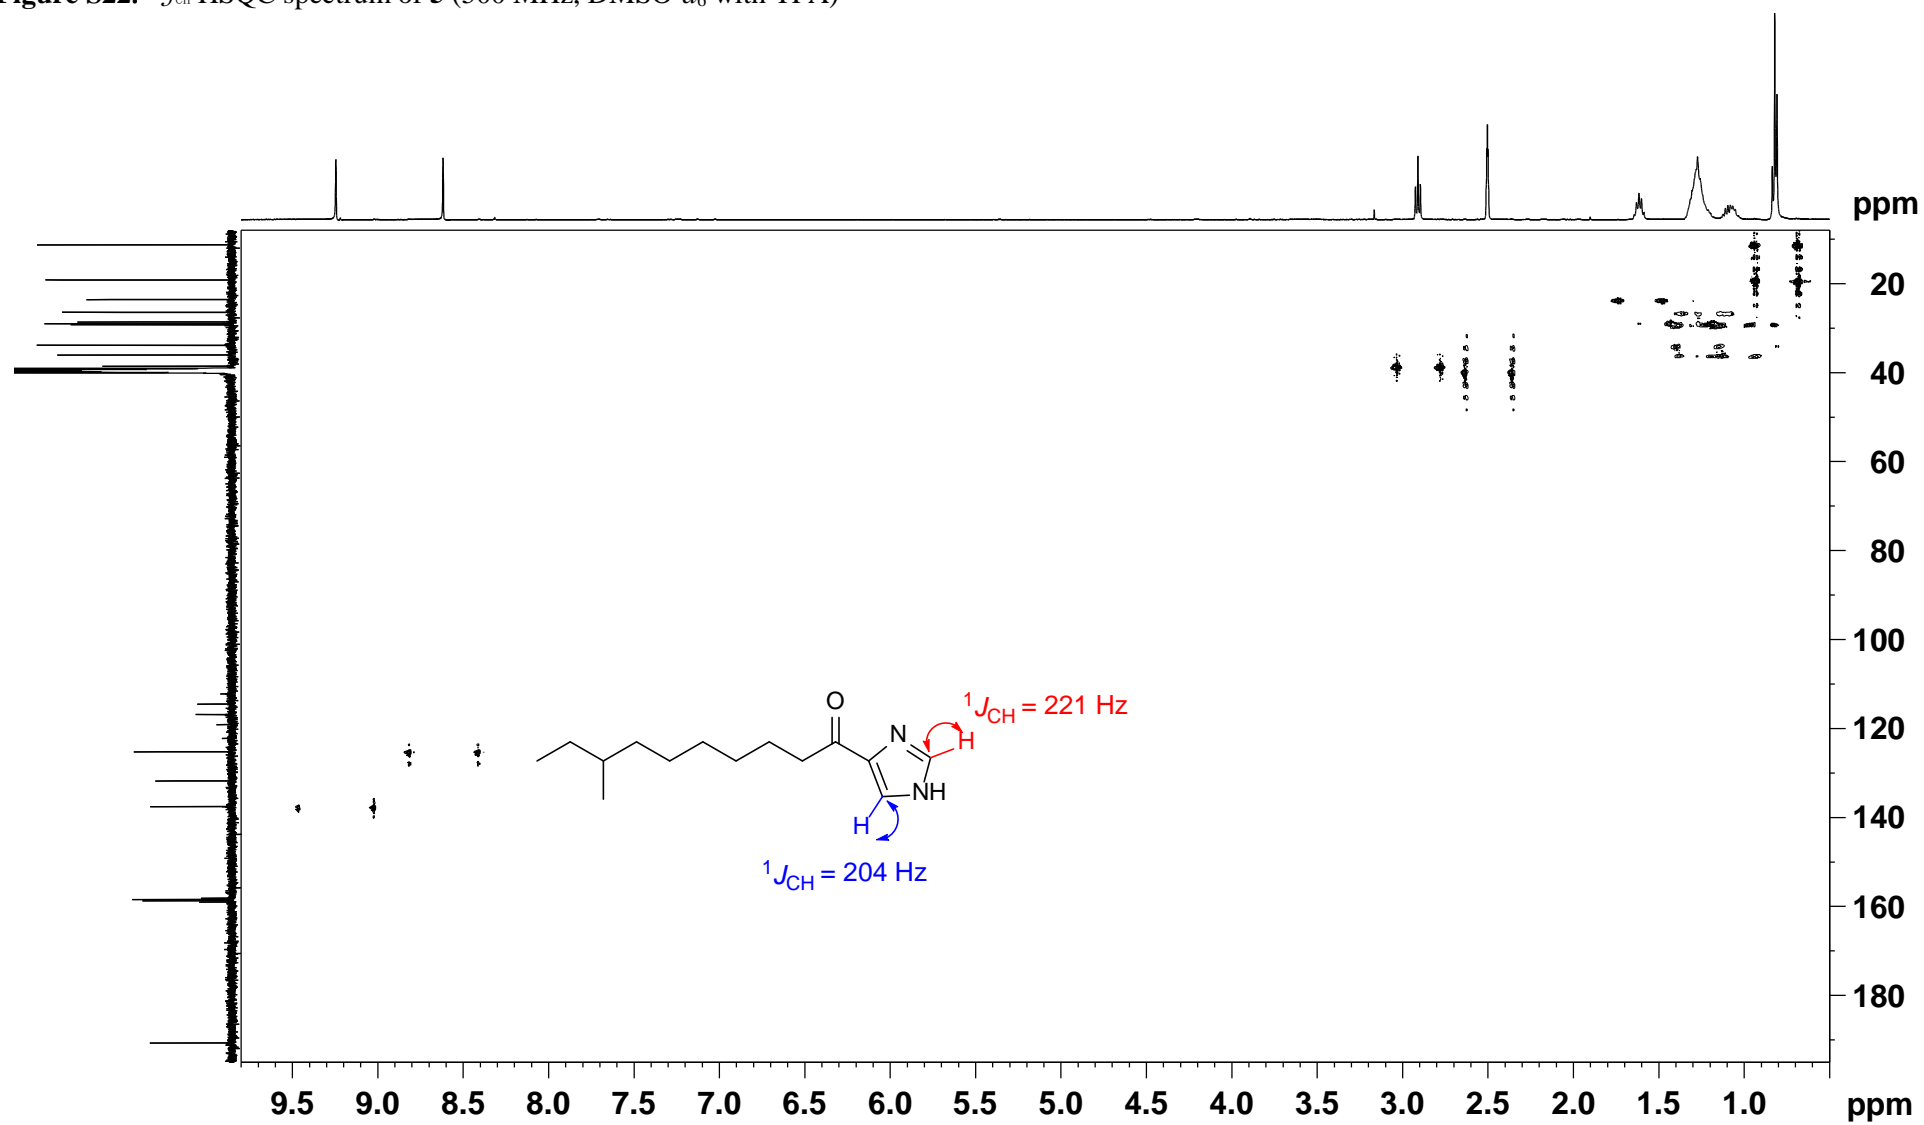

**Figure S23.**  $^1\text{H}$  NMR spectrum of **8** (500 MHz,  $\text{DMSO}-d_6$  with TFA)

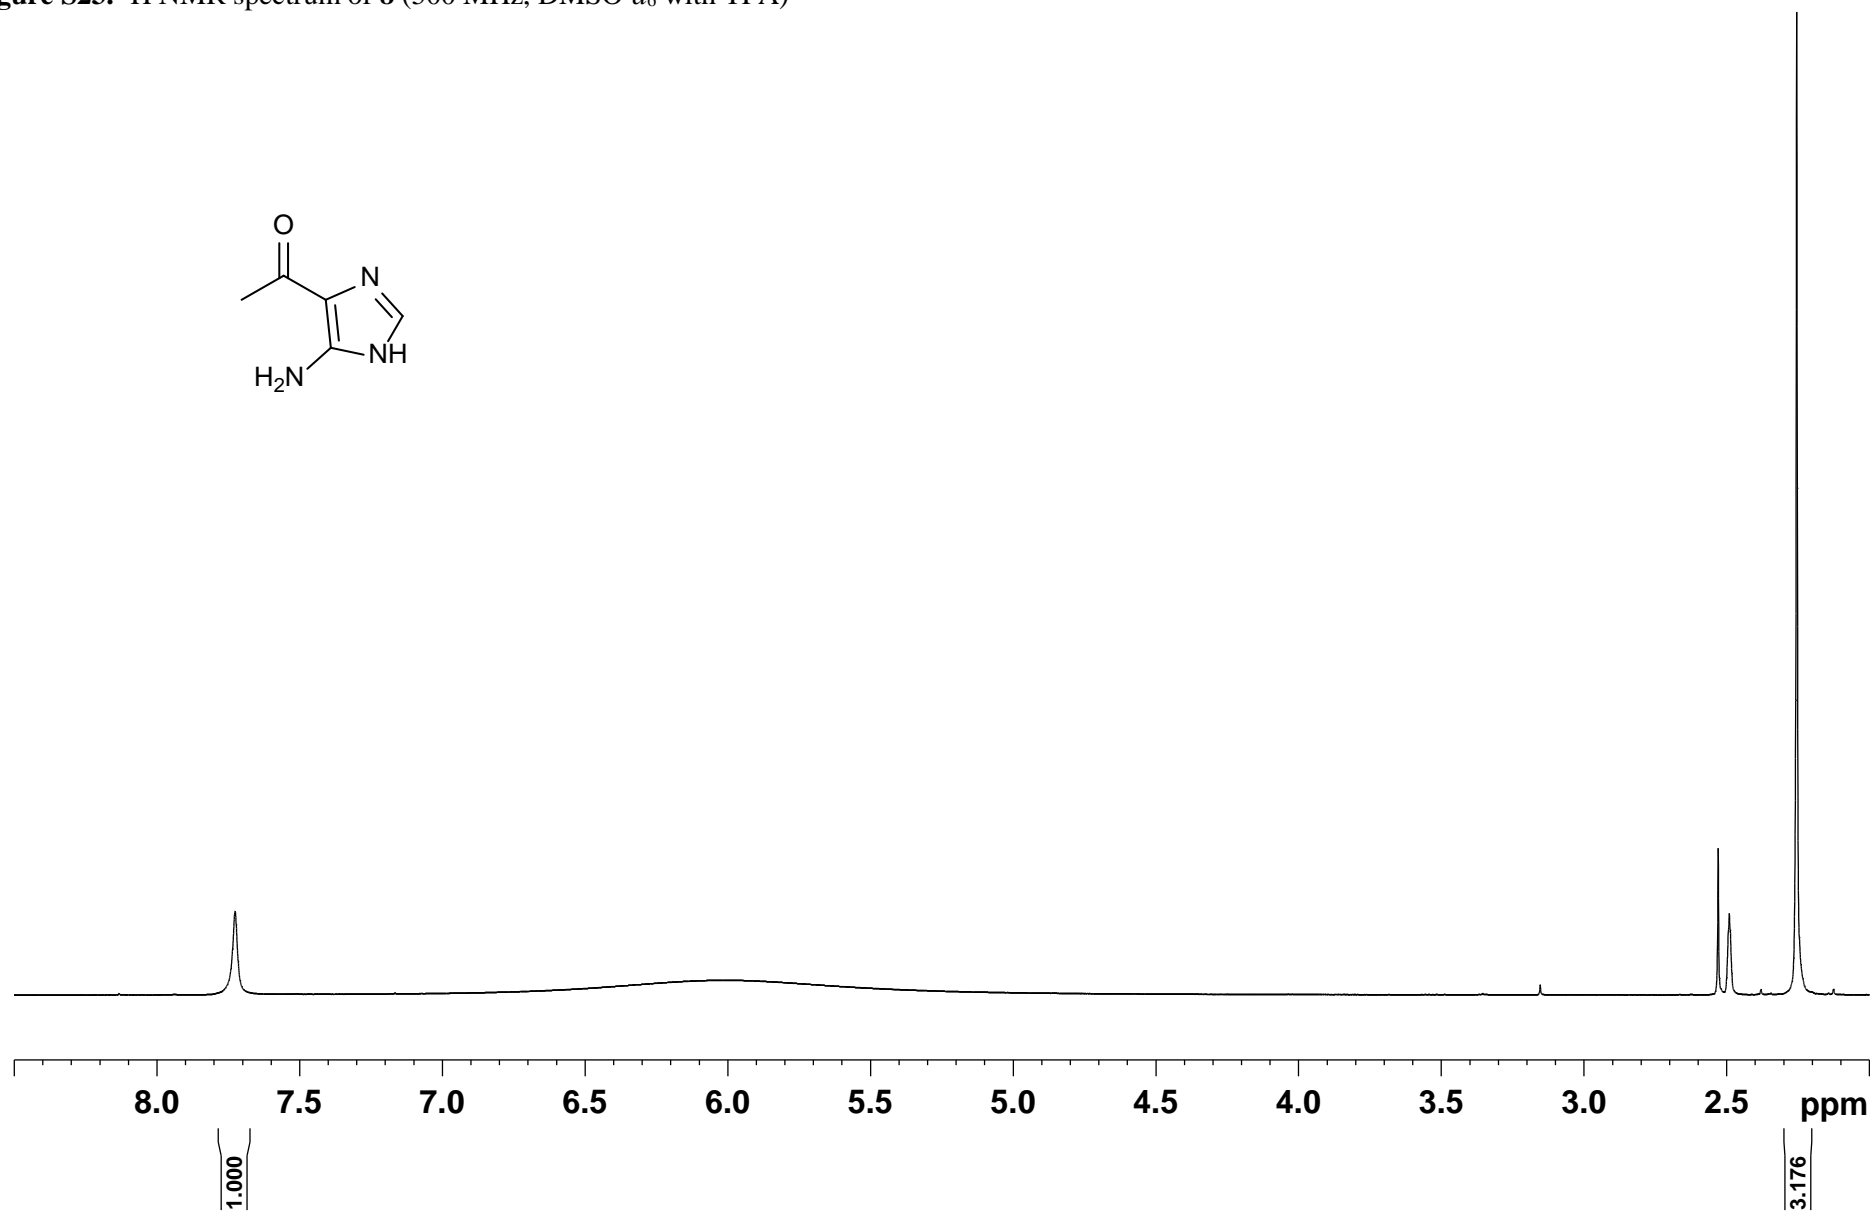

**Figure S24.**  $^{13}\text{C}$  NMR spectrum of **8** (125 MHz,  $\text{DMSO}-d_6$  with TFA)

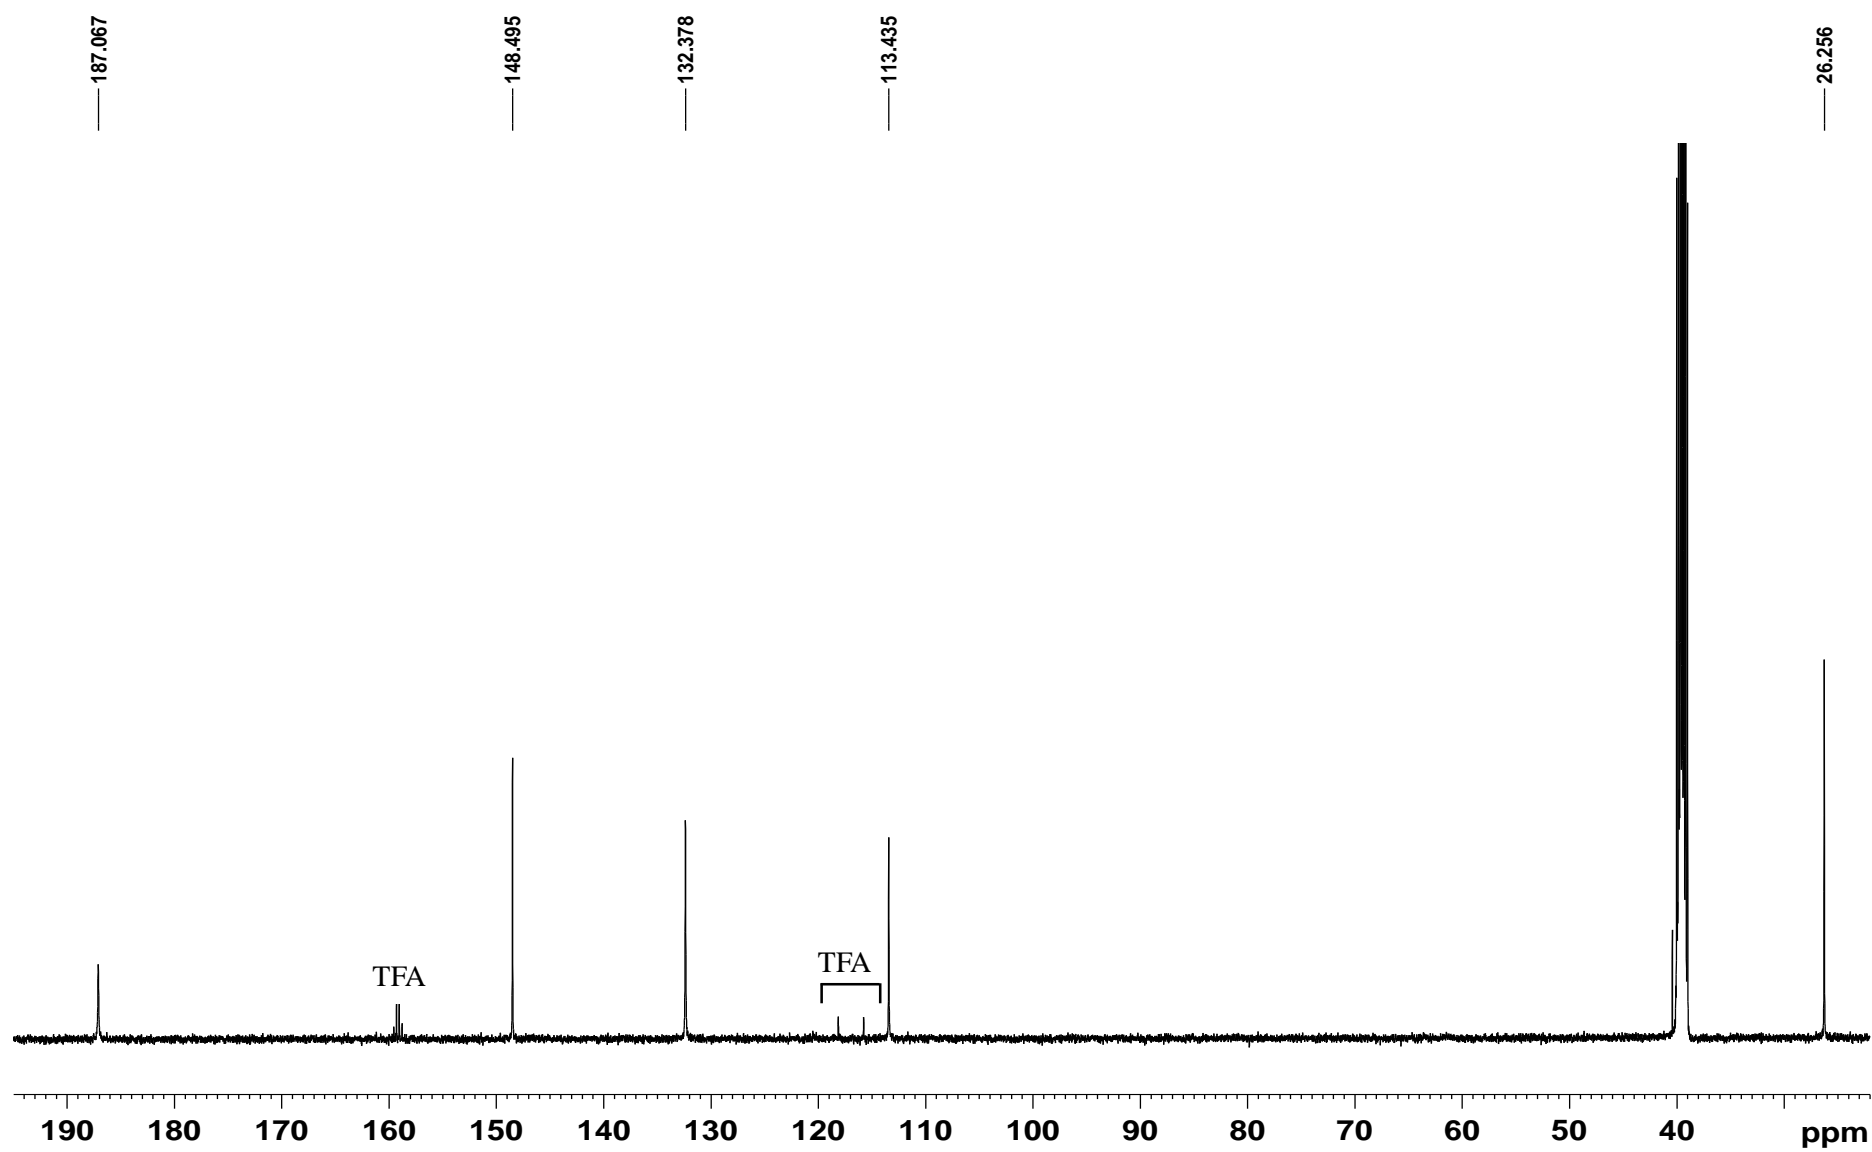

**Figure S25.** HSQC spectrum of **8** (500 MHz, DMSO-*d*<sub>6</sub> with TFA)

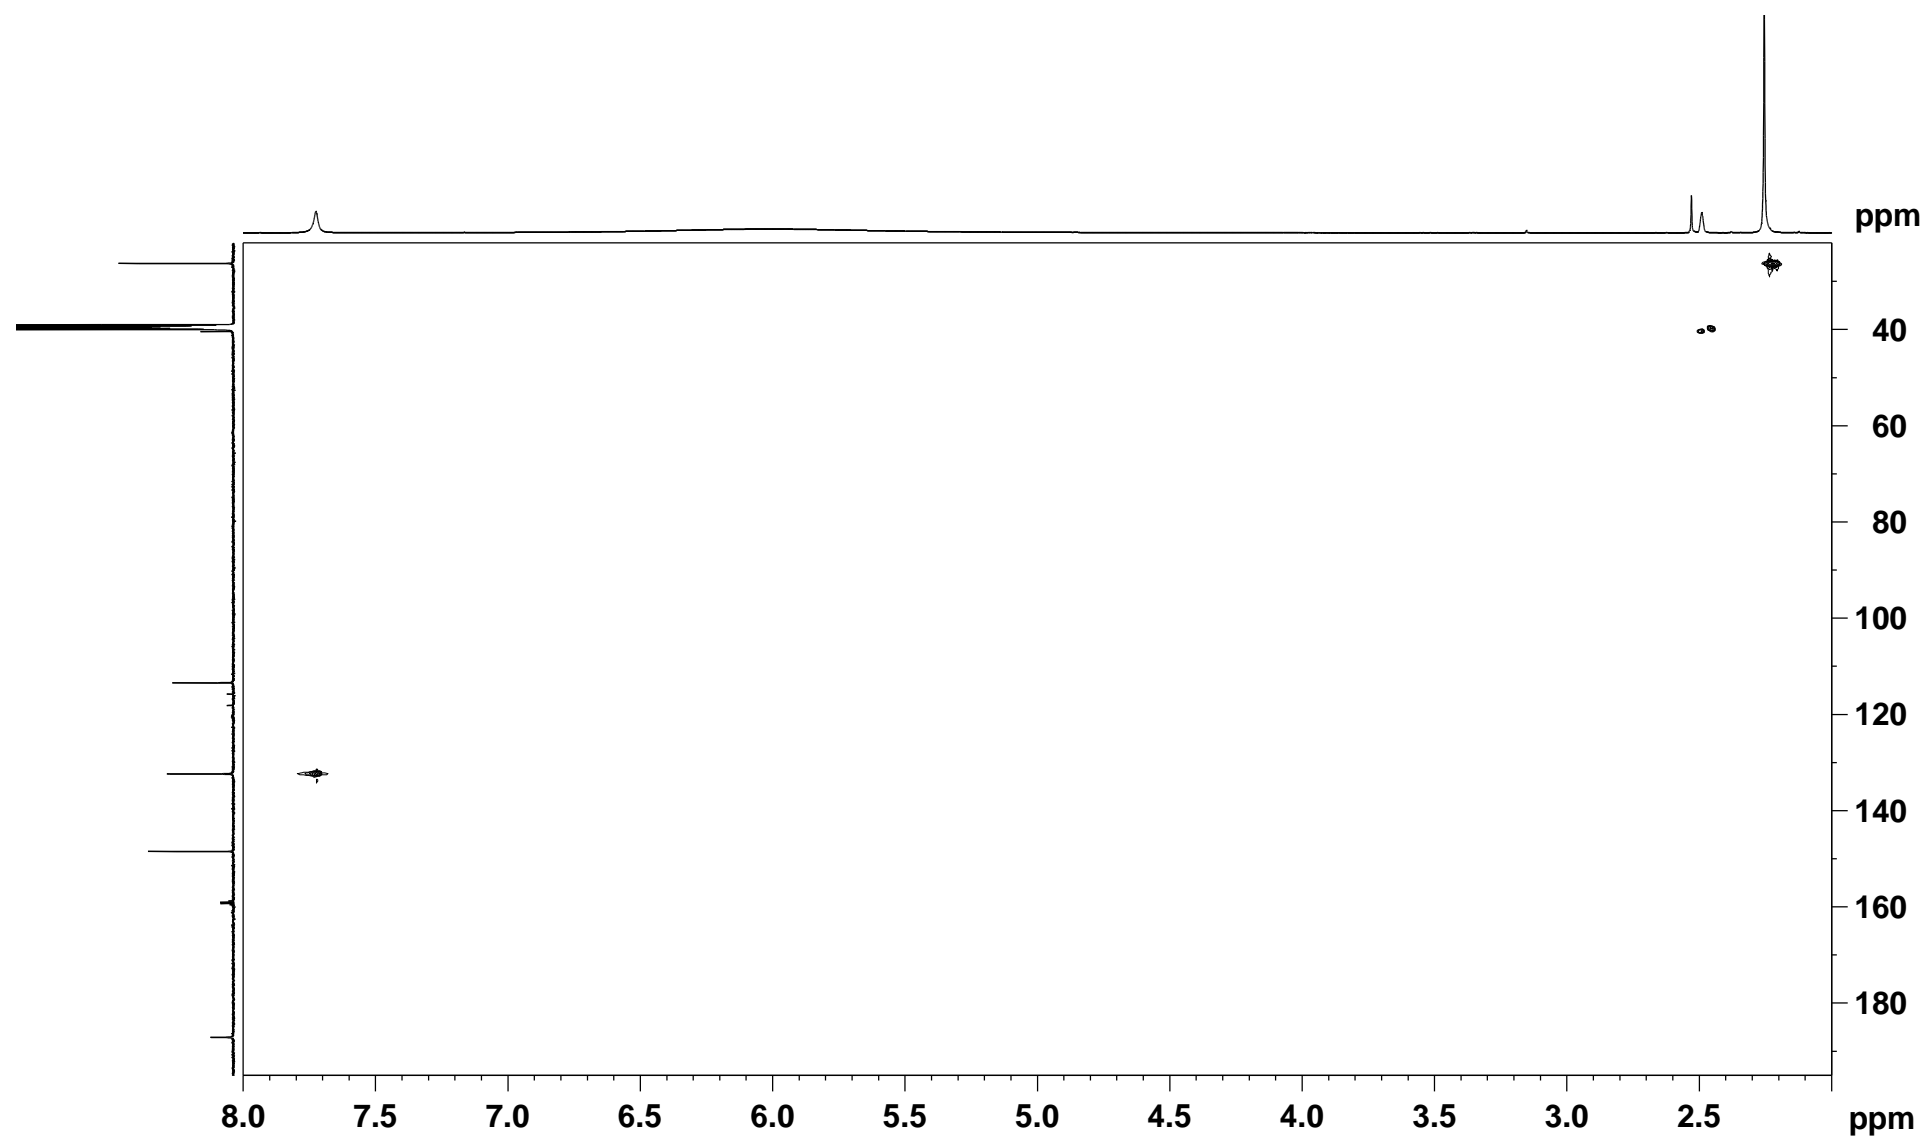

**Figure S26.** Coupled HSQC spectrum of **8** (500 MHz, DMSO-*d*<sub>6</sub> with TFA)

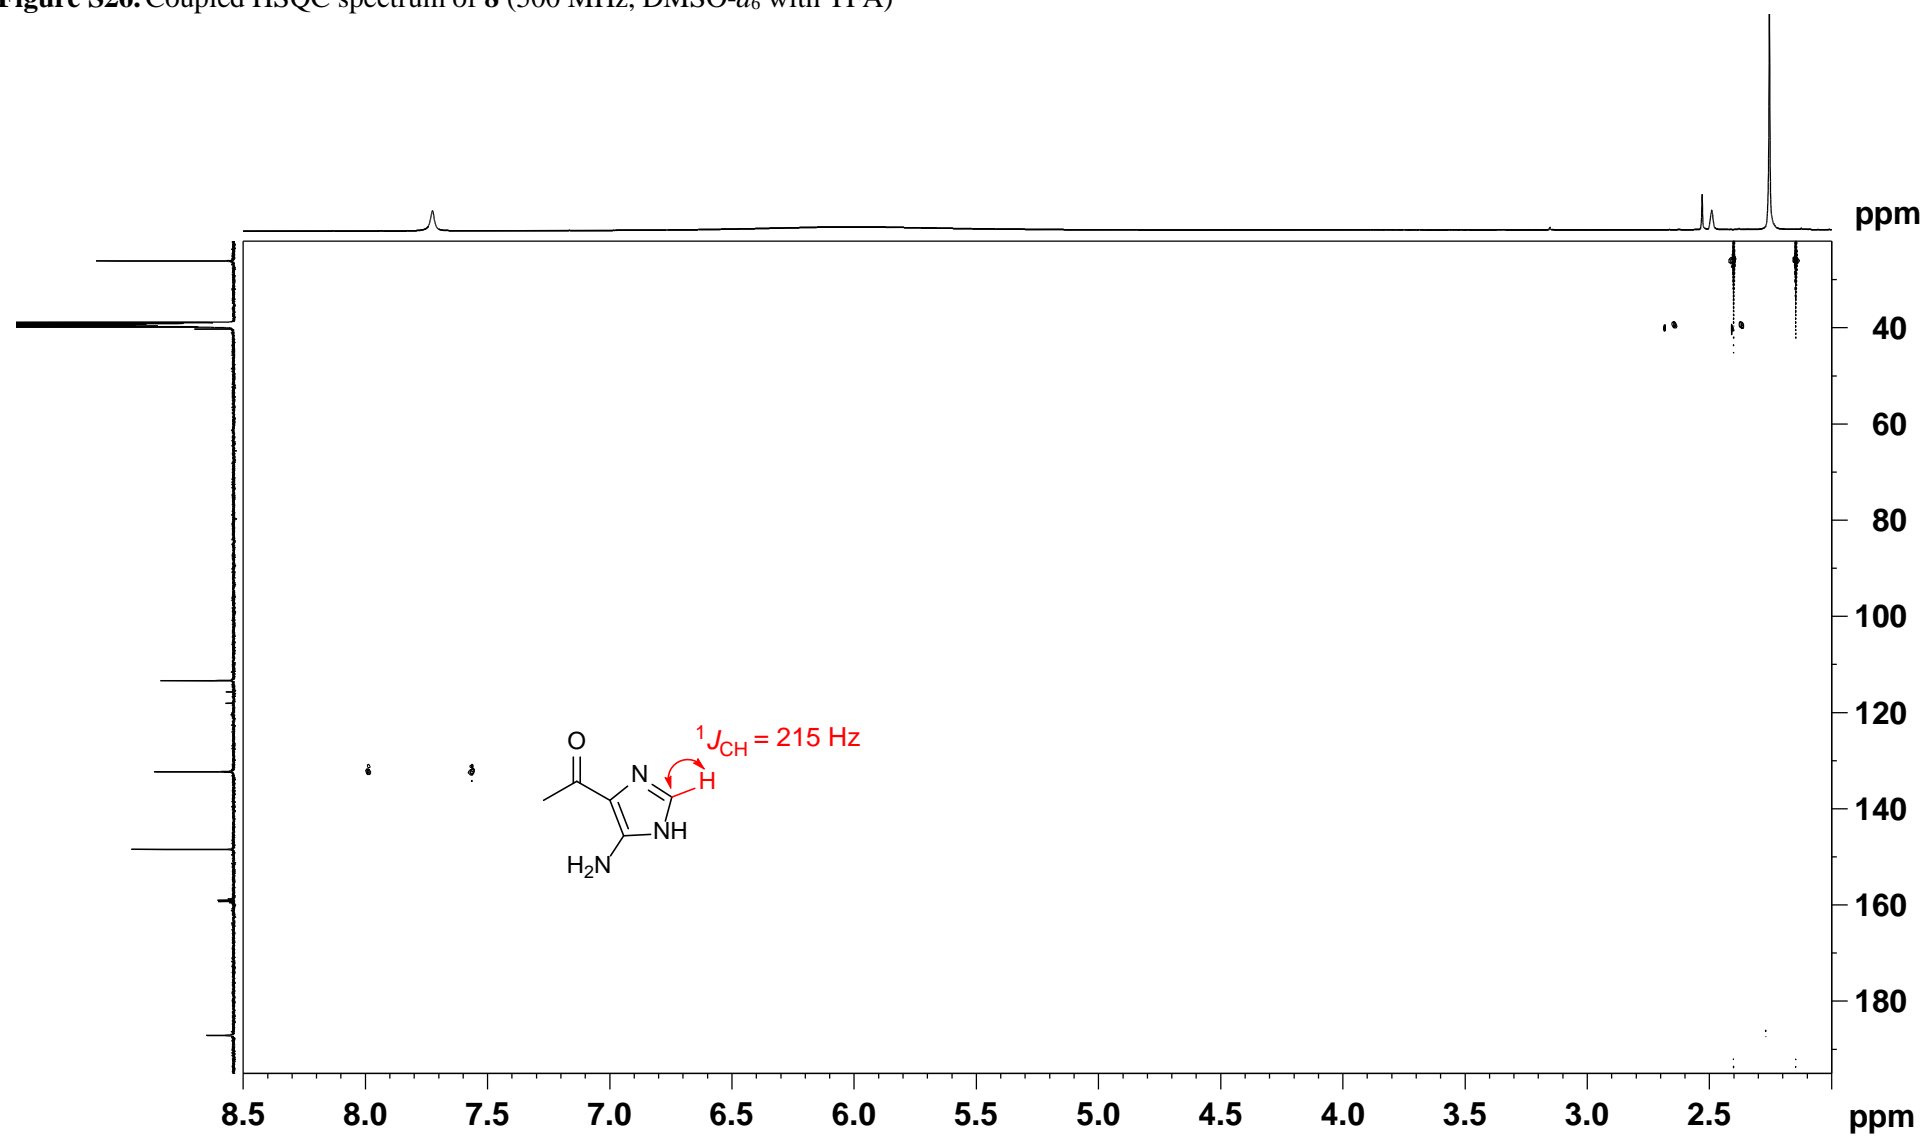



**Figure S27.** HMBC spectrum of **8** (500 MHz, DMSO-*d*<sub>6</sub> with TFA)

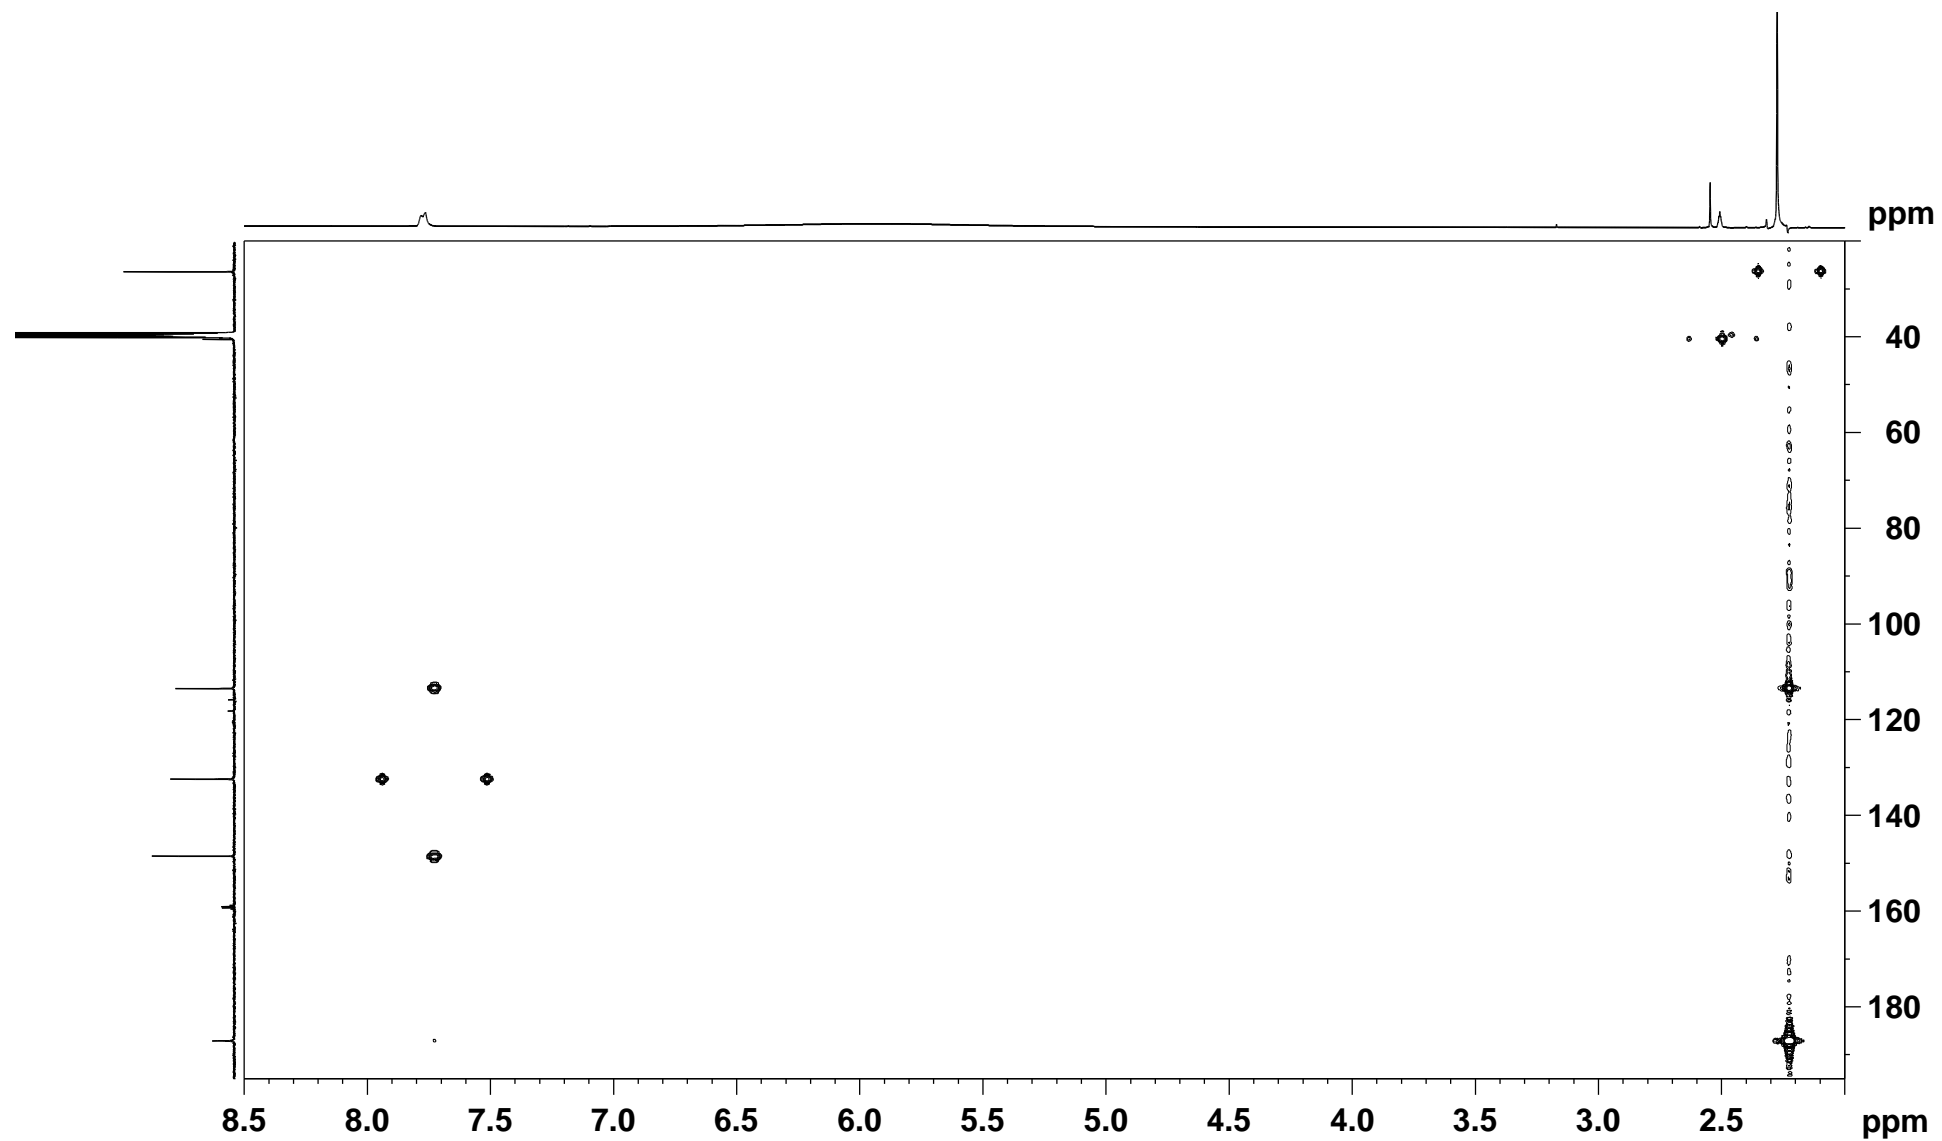

**Figure S28.**  $^1\text{H}$  NMR spectrum of **9** (500 MHz,  $\text{DMSO}-d_6$  with TFA)

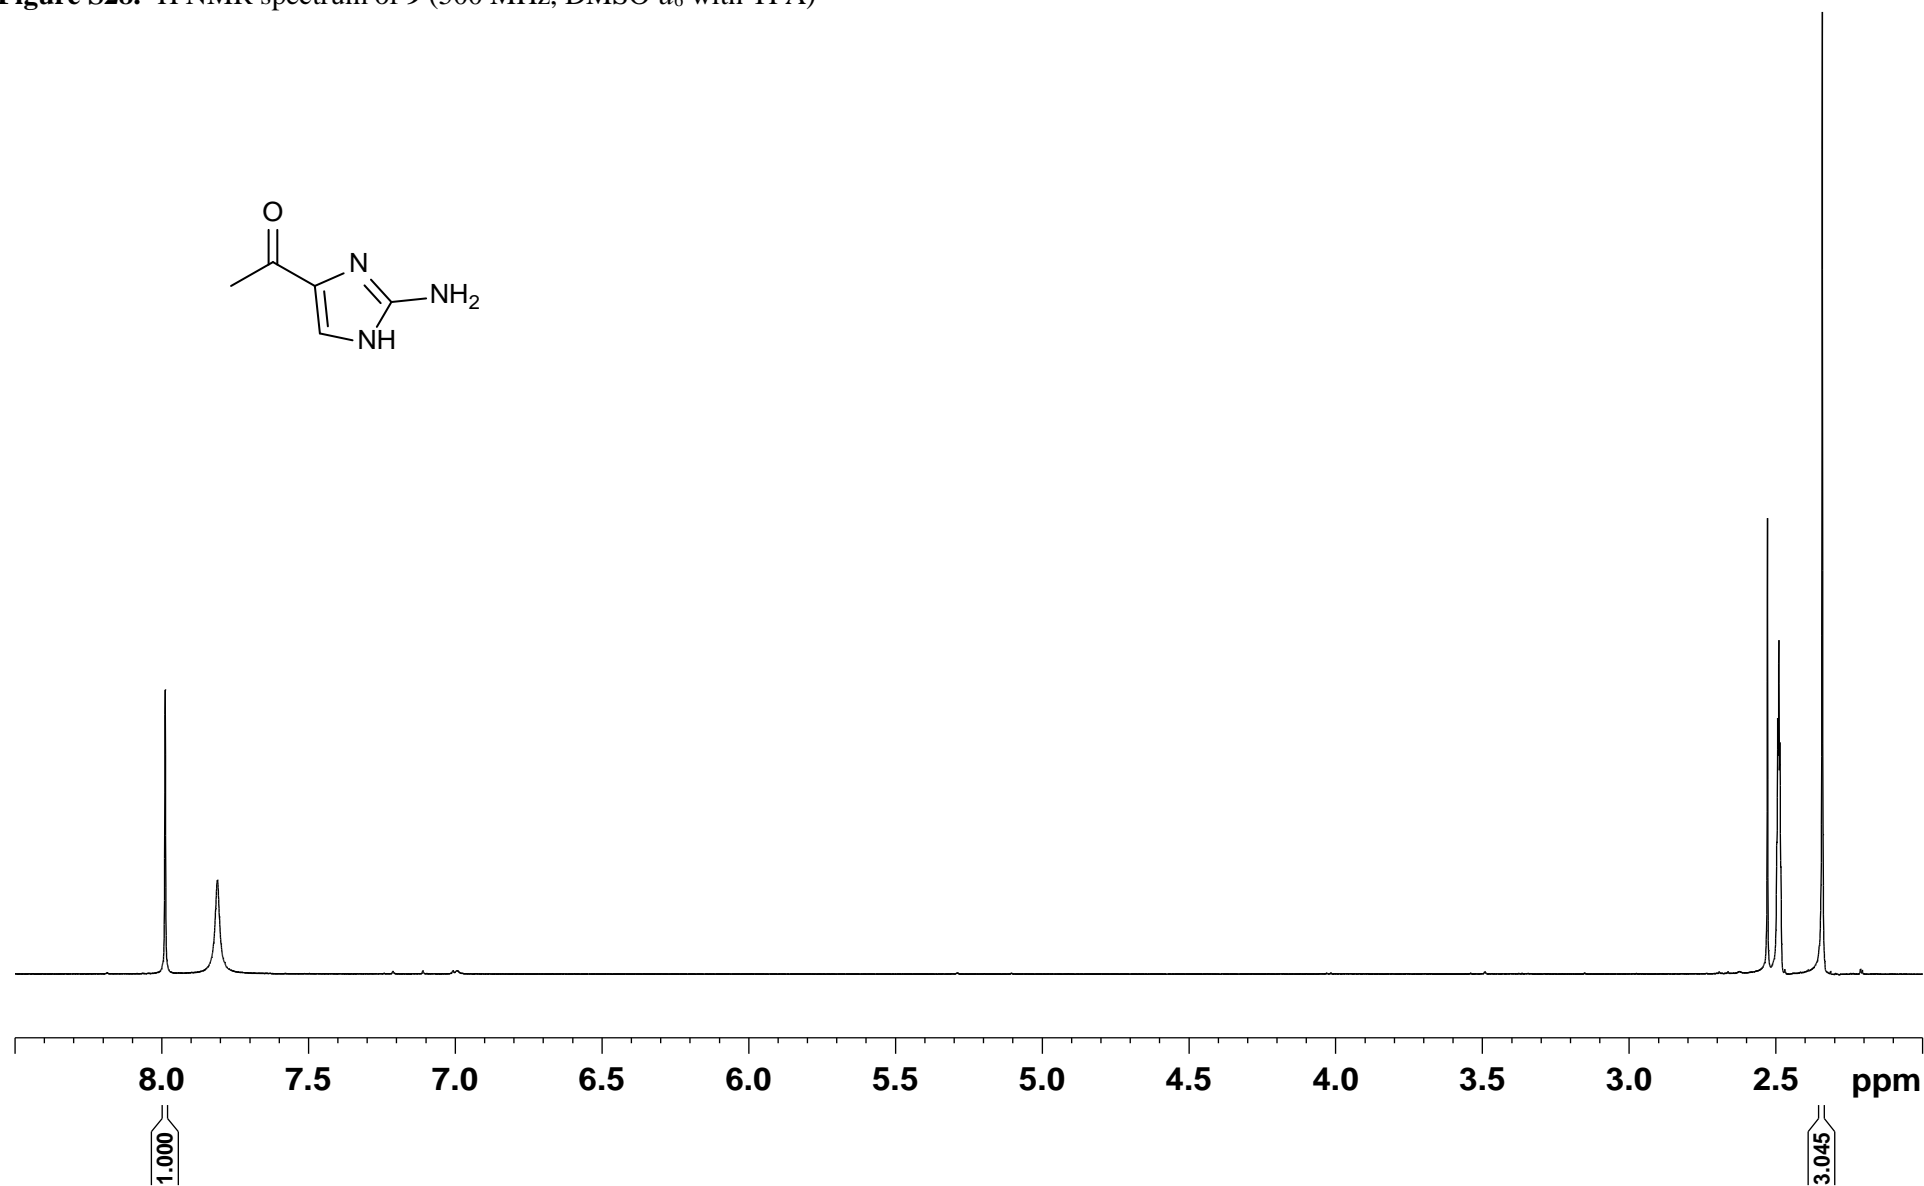

**Figure S29.**  $^{13}\text{C}$  NMR spectrum of **9** (125 MHz,  $\text{DMSO}-d_6$  with TFA)

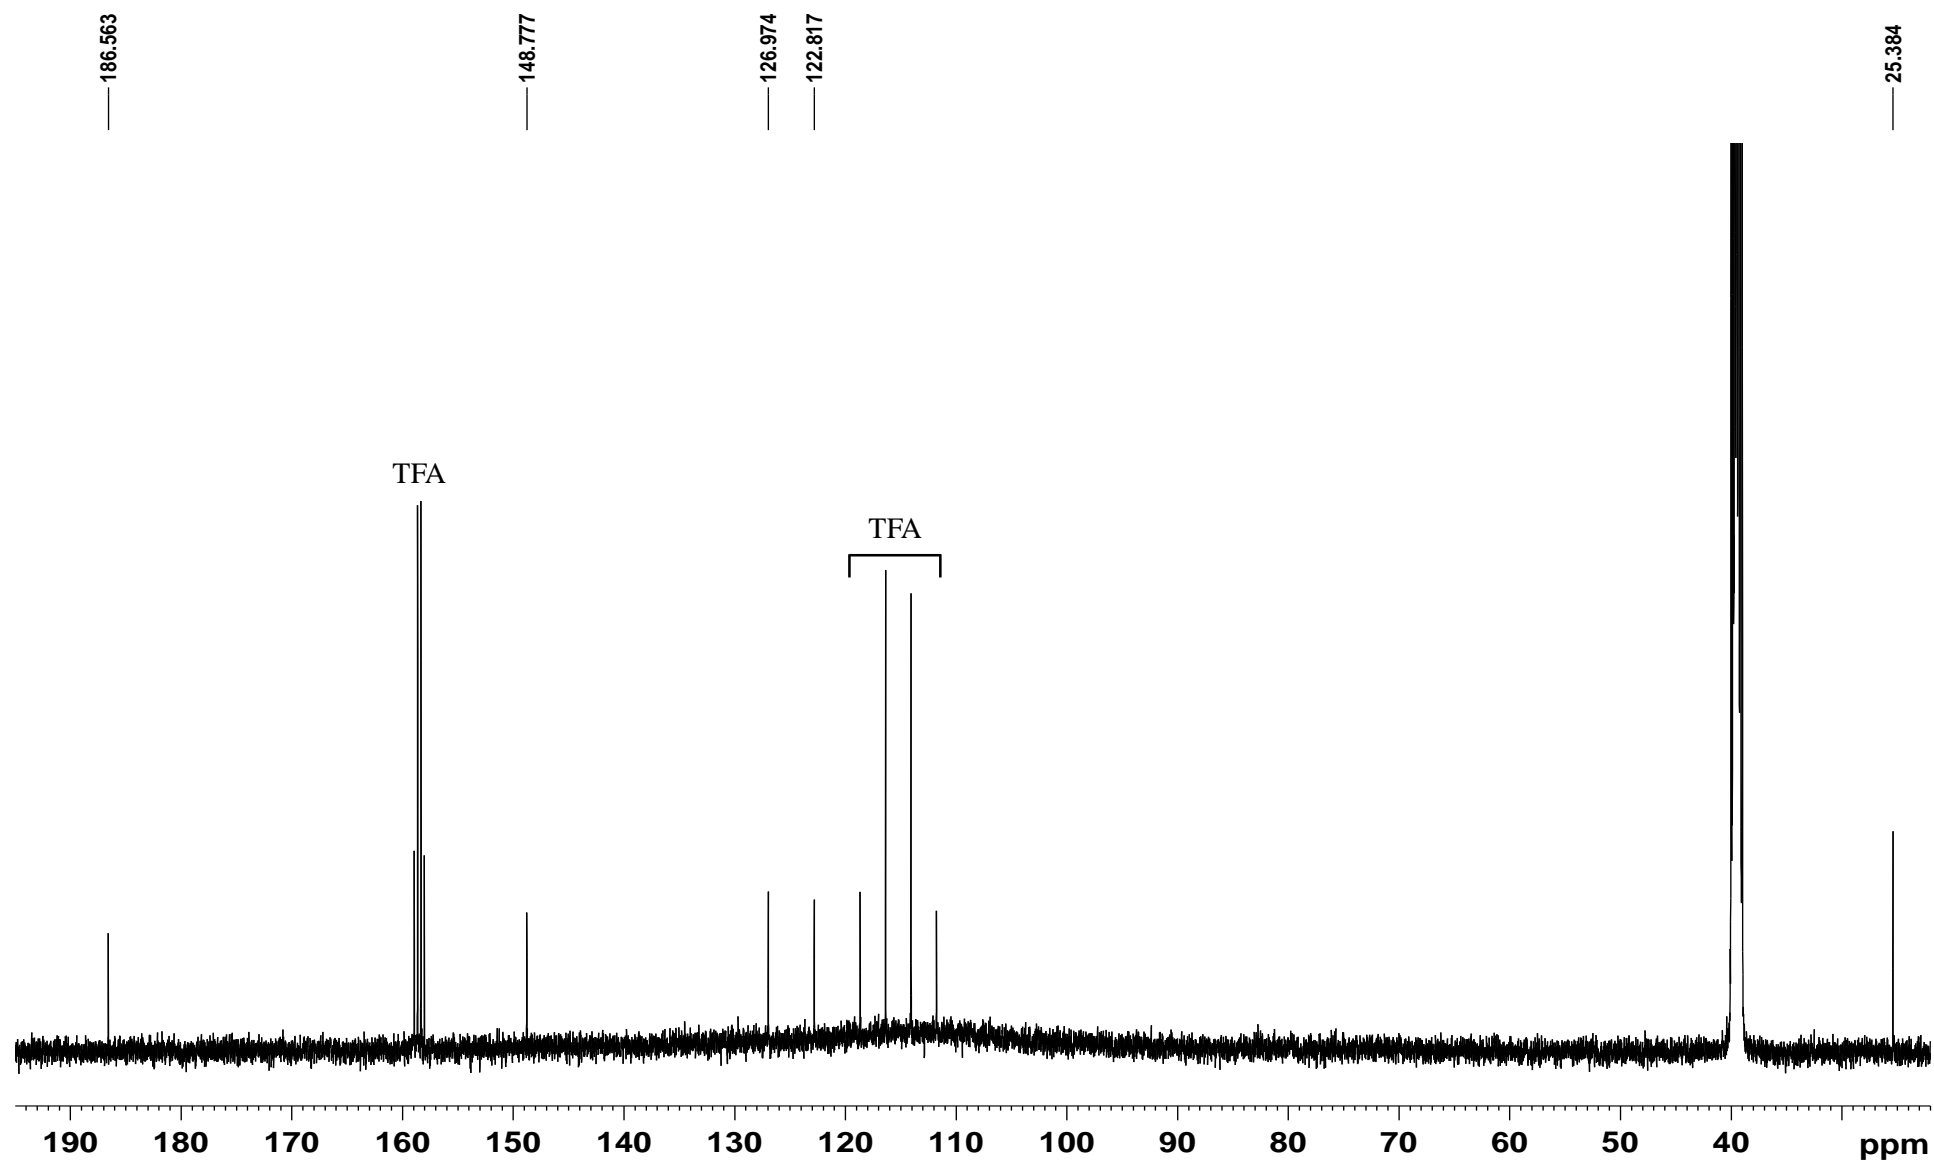

**Figure S30.** HSQC spectrum of **9** (500 MHz, DMSO-*d*<sub>6</sub> with TFA)

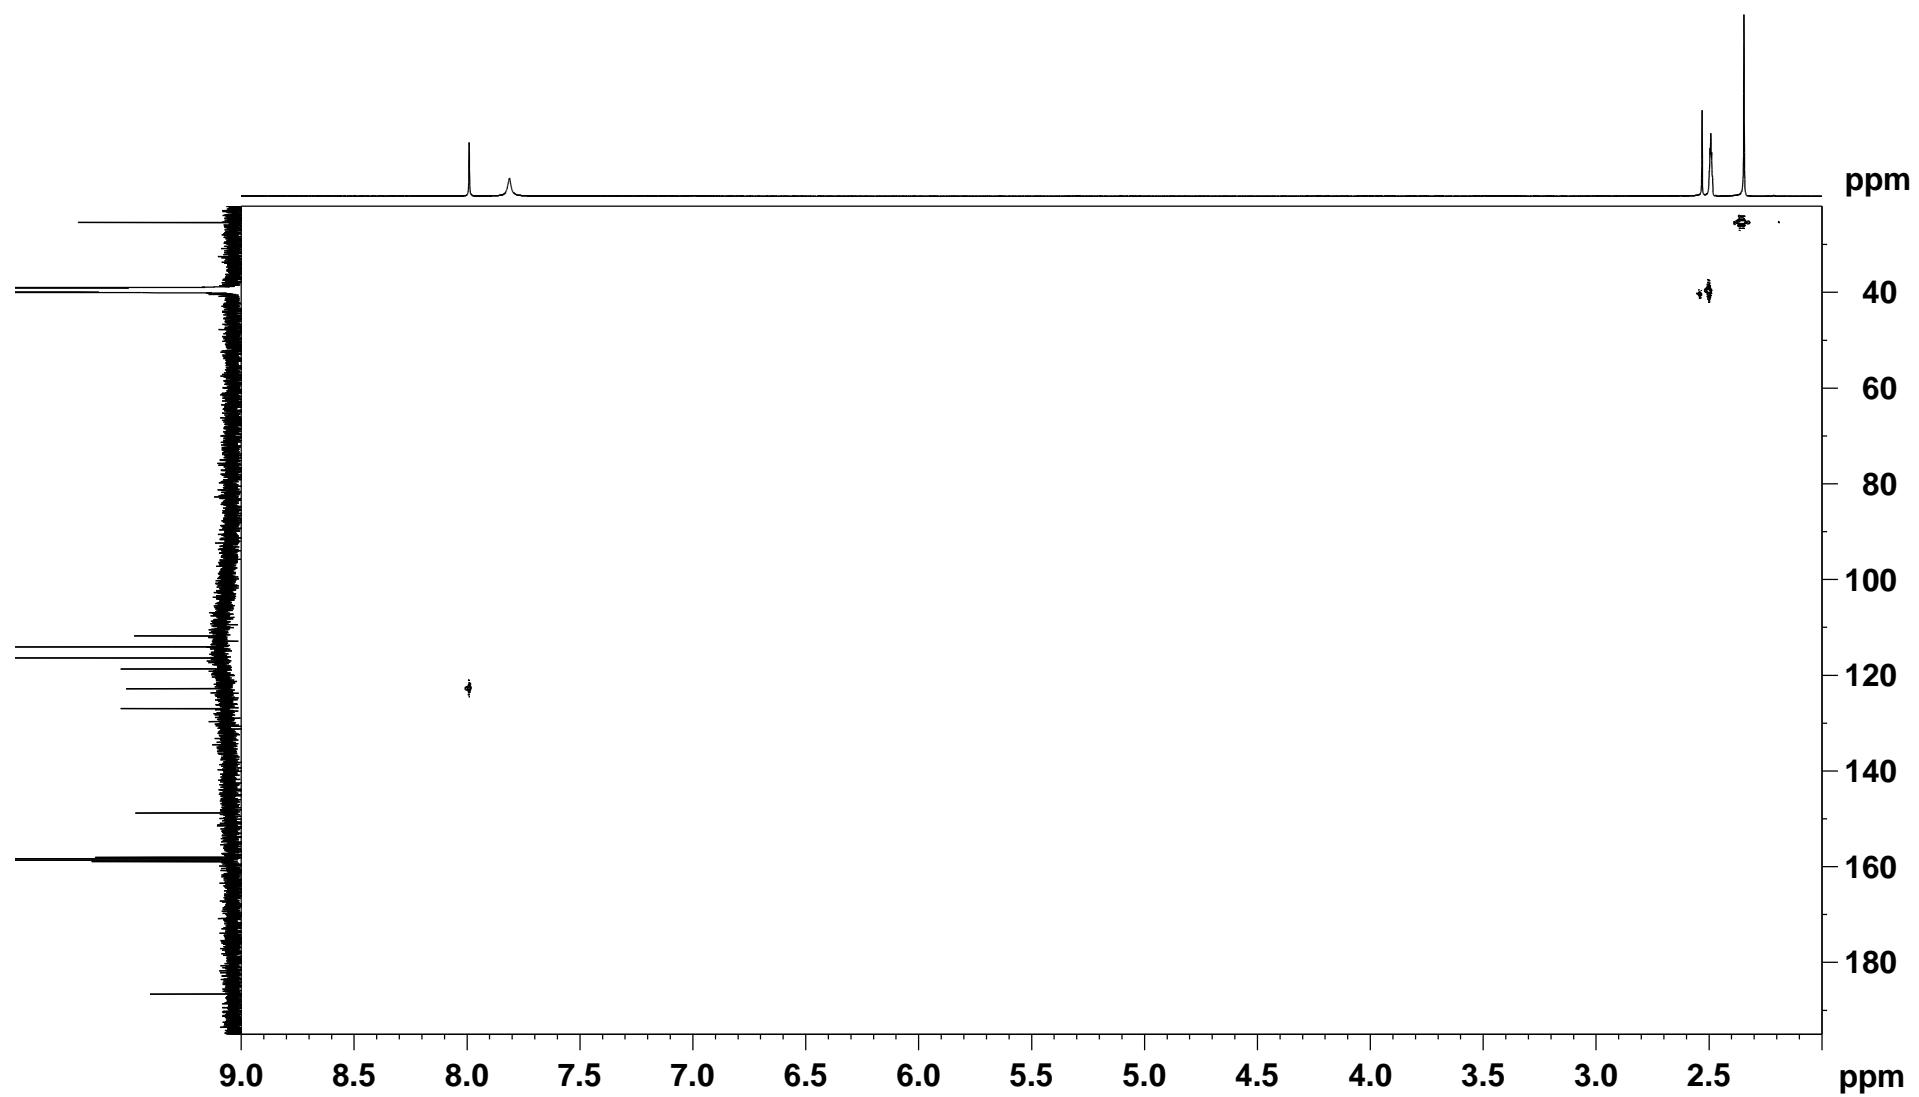

**Figure S31.** Coupled HSQC spectrum of **9** (500 MHz, DMSO-*d*<sub>6</sub> with TFA)

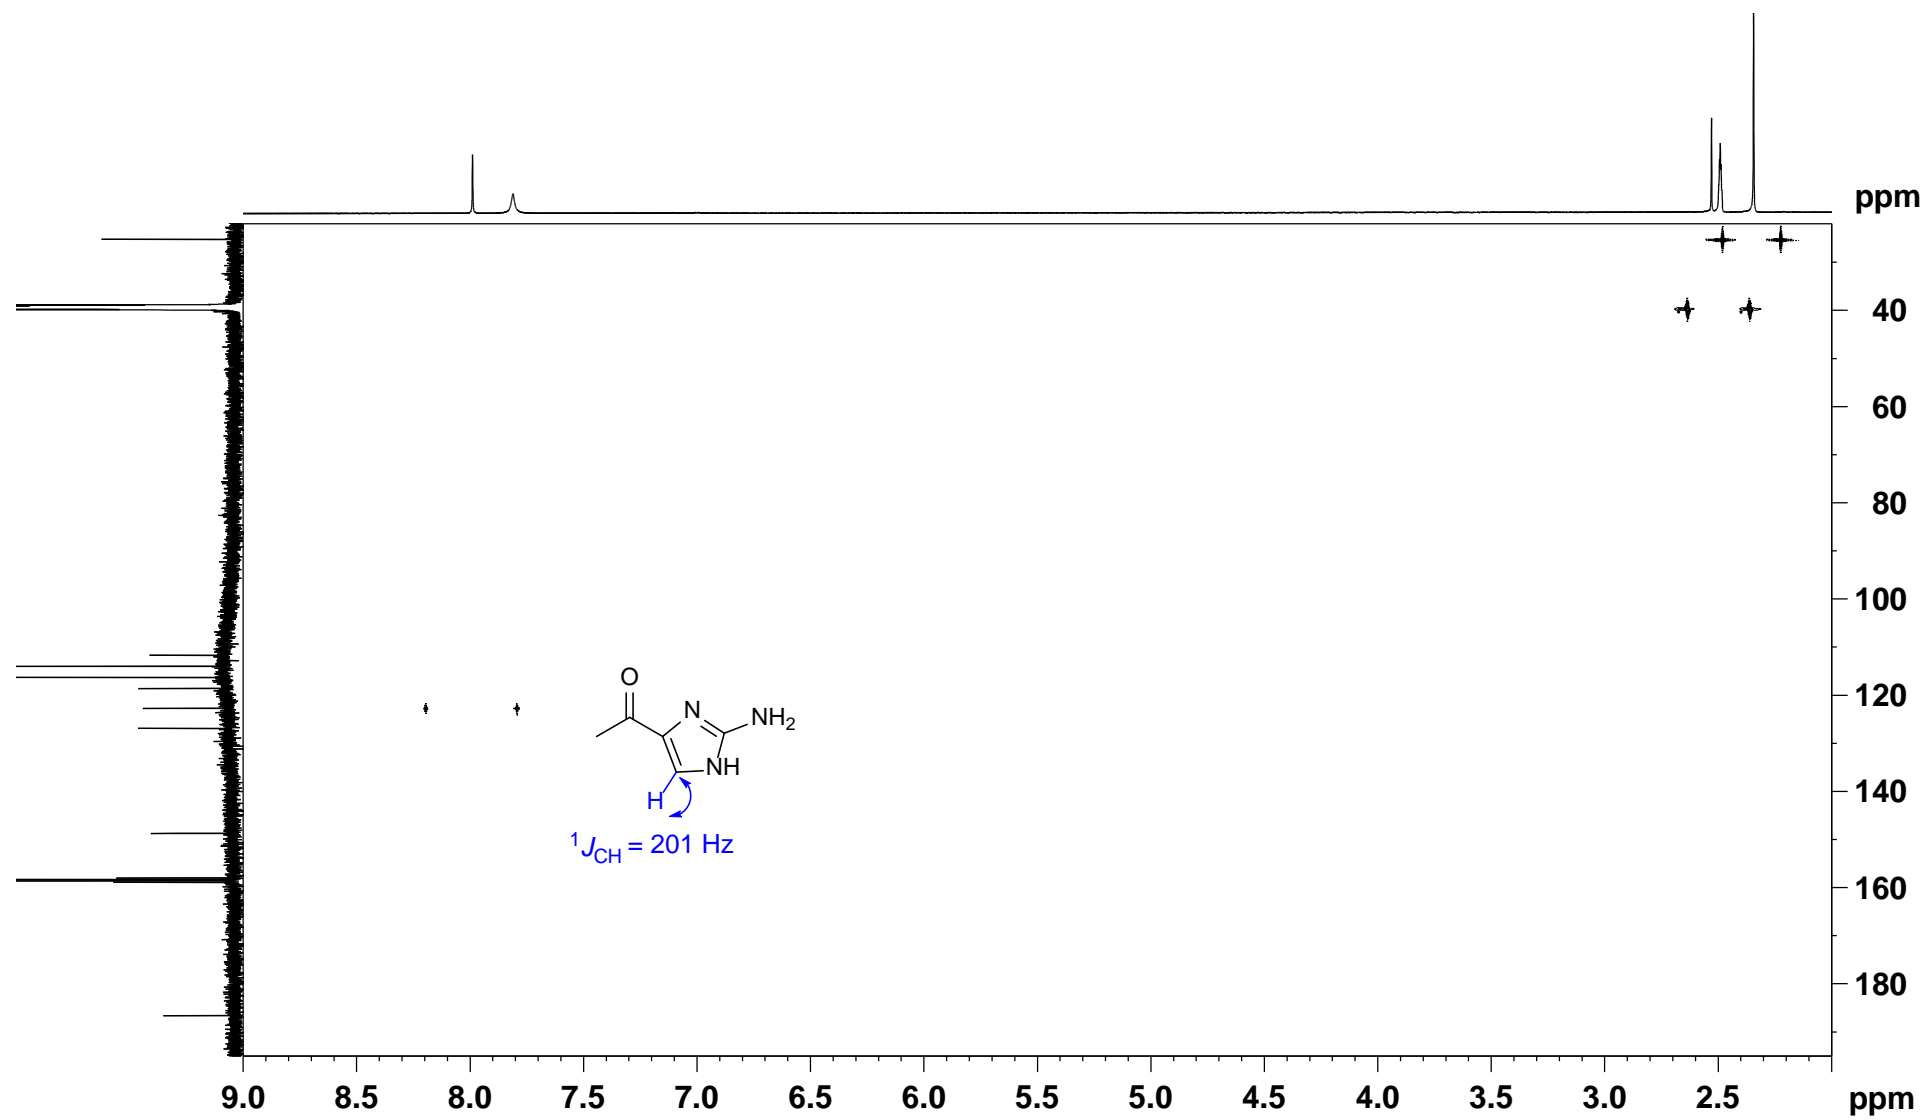

**Figure S32.** HMBC spectrum of **9** (500 MHz, DMSO-*d*<sub>6</sub> with TFA)

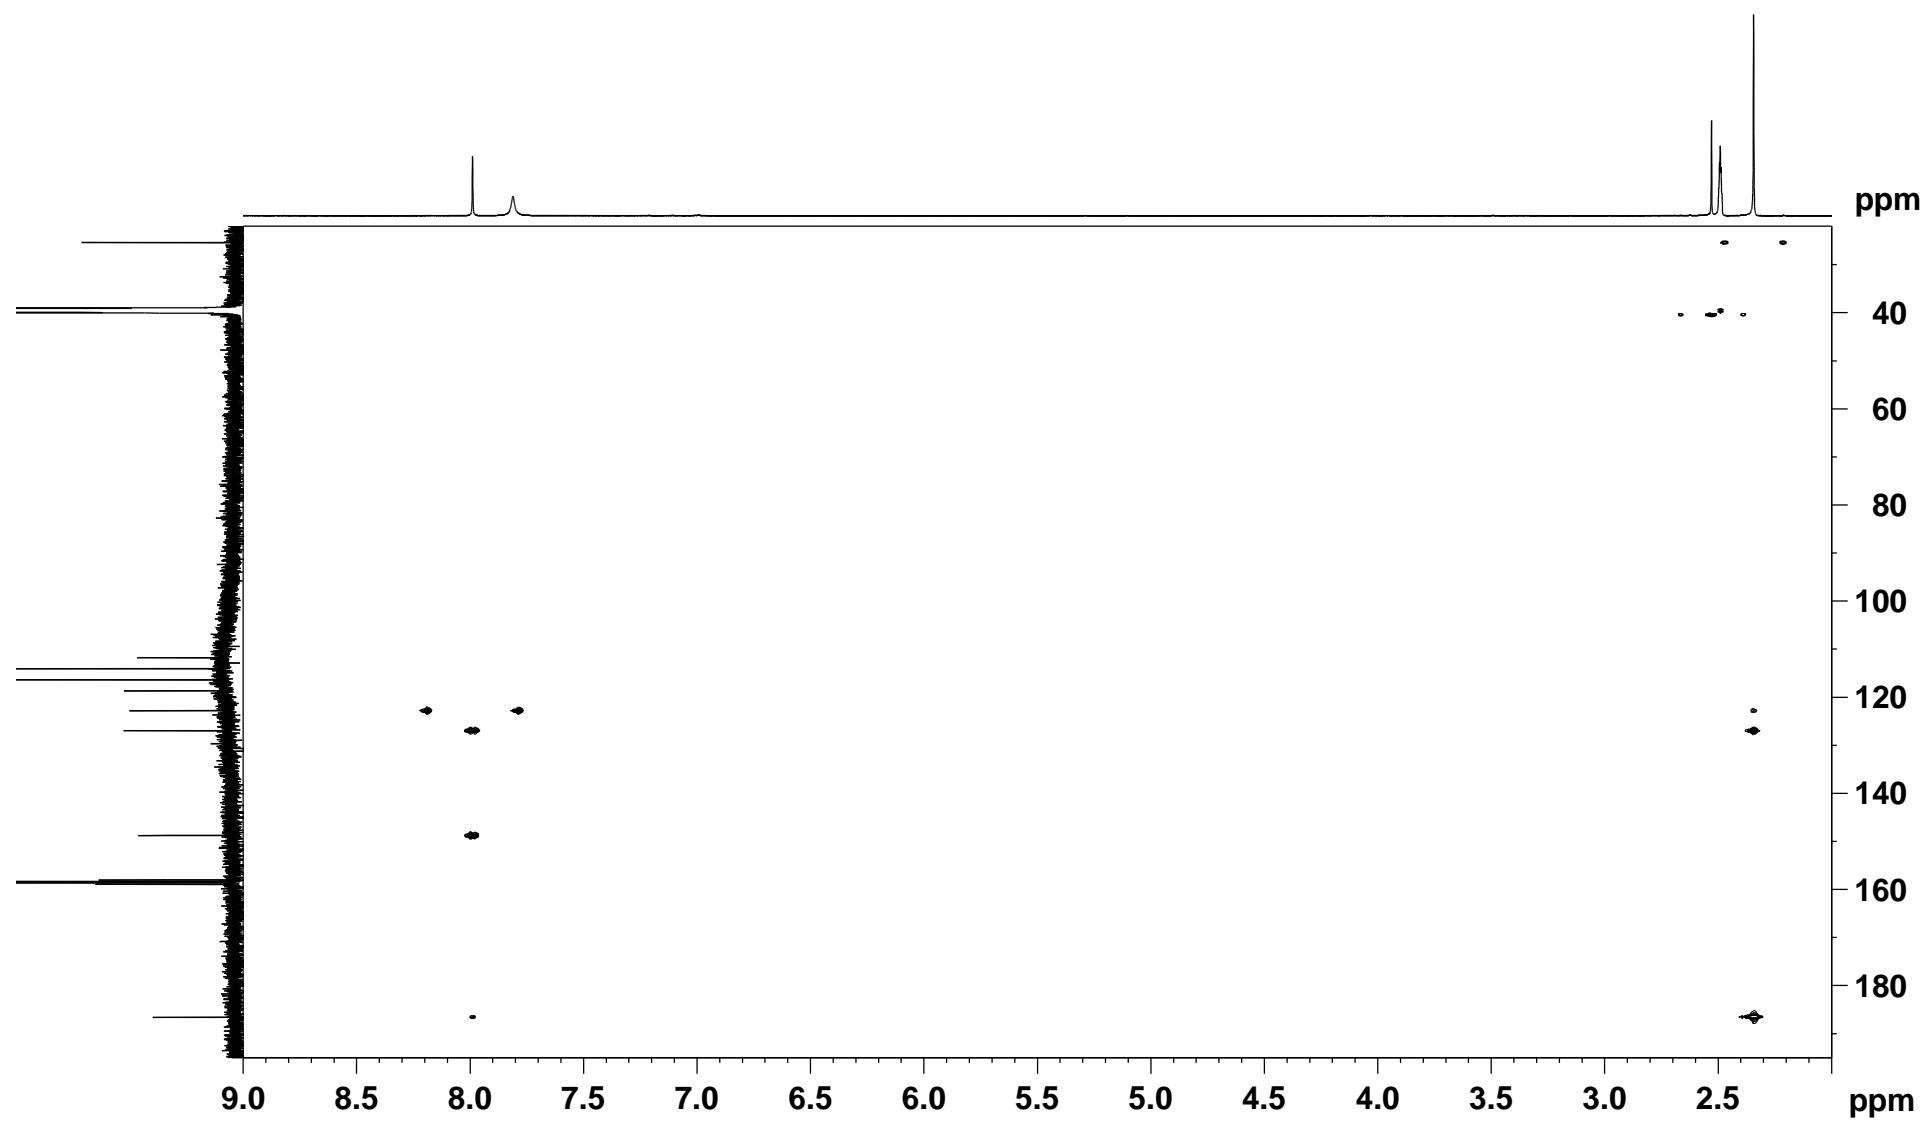

**Figure S33.**  $^1\text{H}$  NMR spectrum of *nat*-**10**-(*R*)-2A1P (500 MHz,  $\text{CDCl}_3$ )

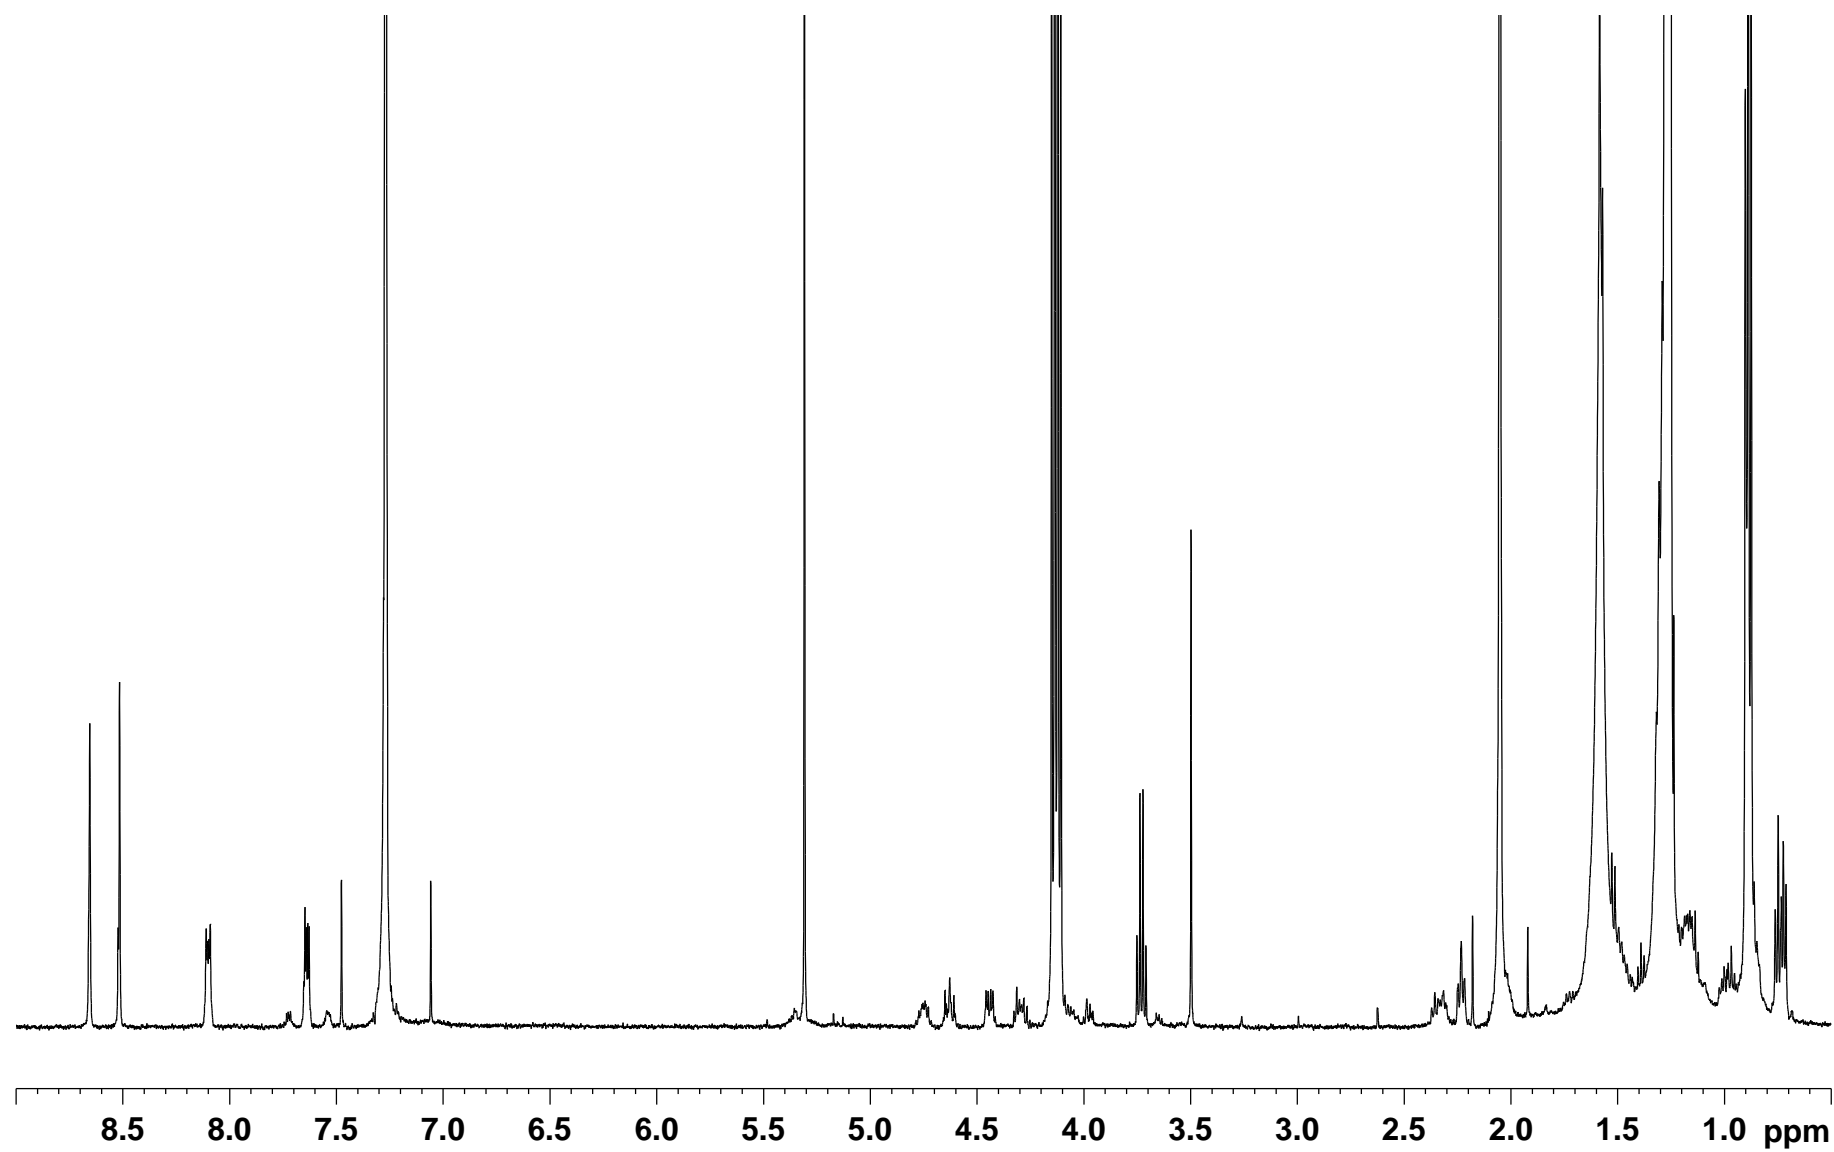

**Figure S34.**  $^1\text{H}$  NMR spectrum of authentic (*S*)-**10**-(*R*)-2A1P (500 MHz,  $\text{CDCl}_3$ )

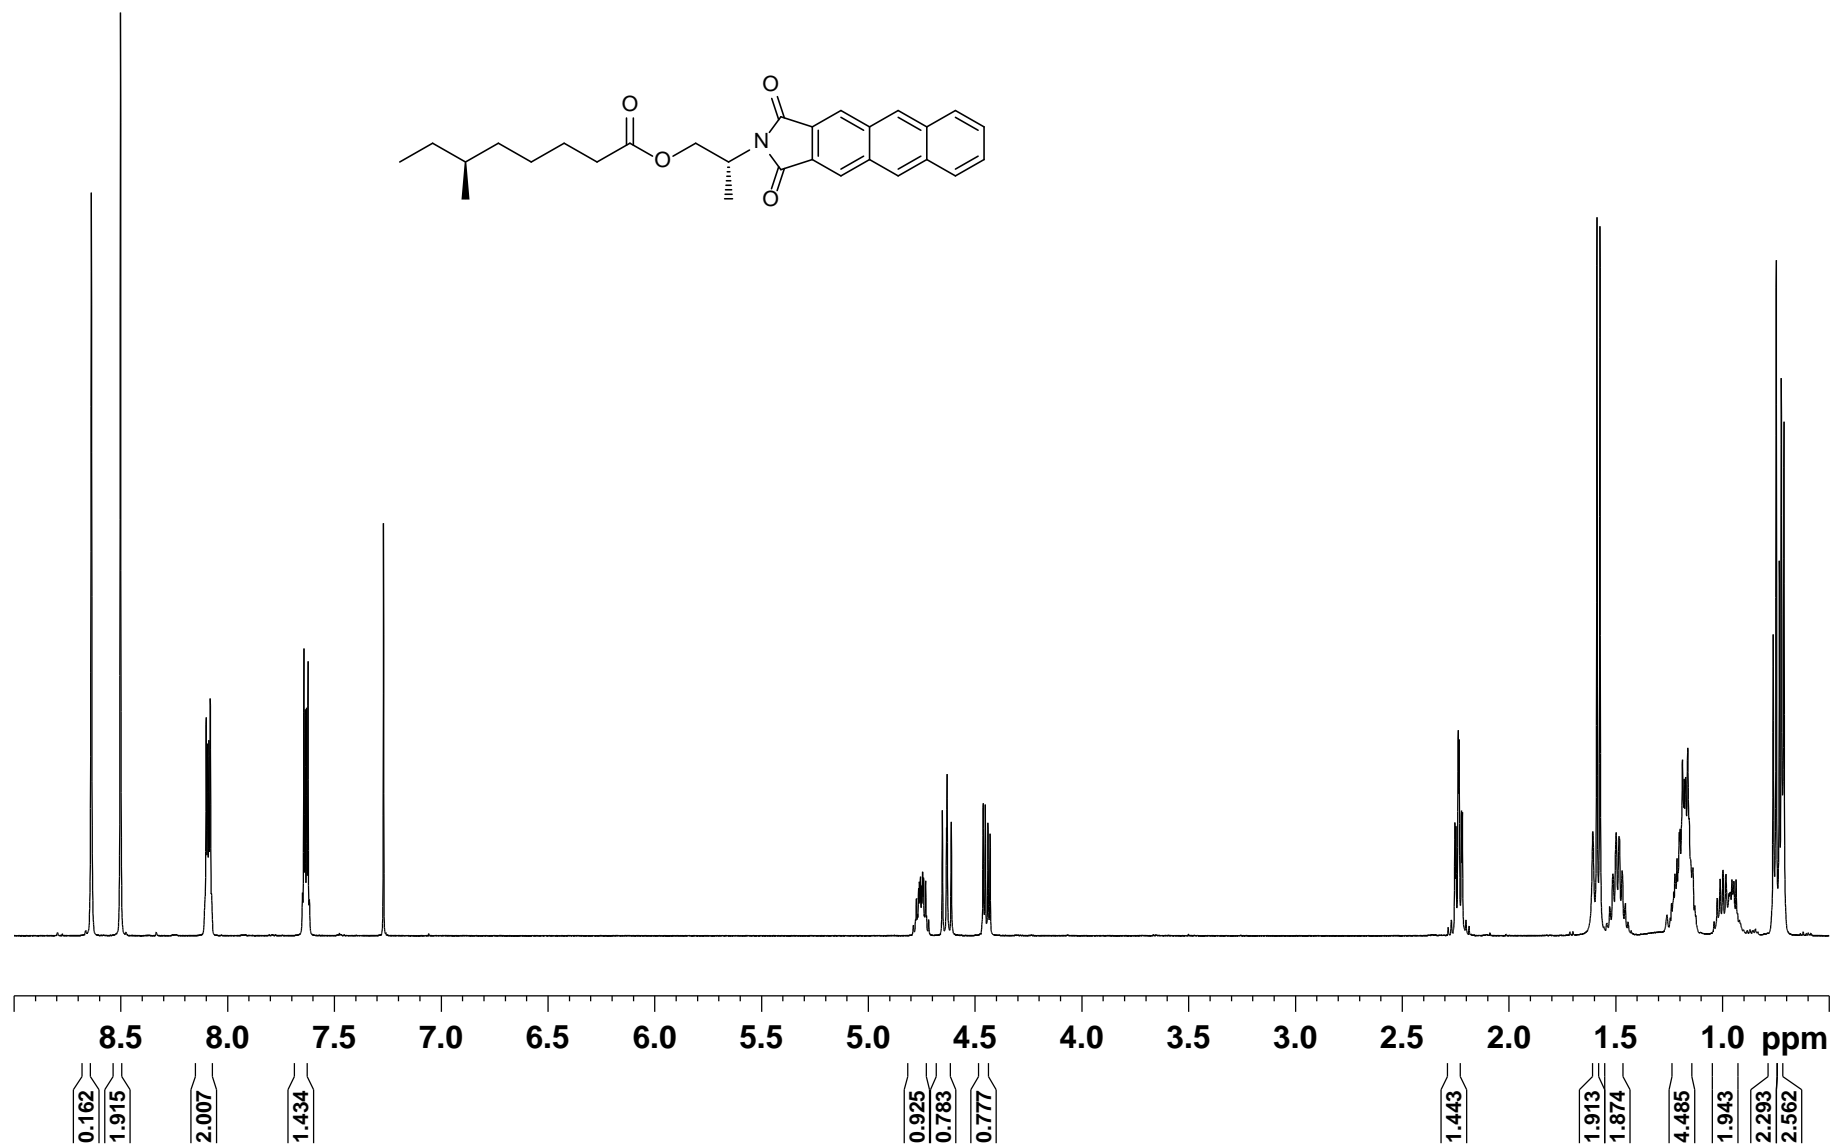



**Figure S35.**  $^1\text{H}$  NMR spectrum of authentic (*S*)-**10**-(*S*)-2A1P (500 MHz,  $\text{CDCl}_3$ )

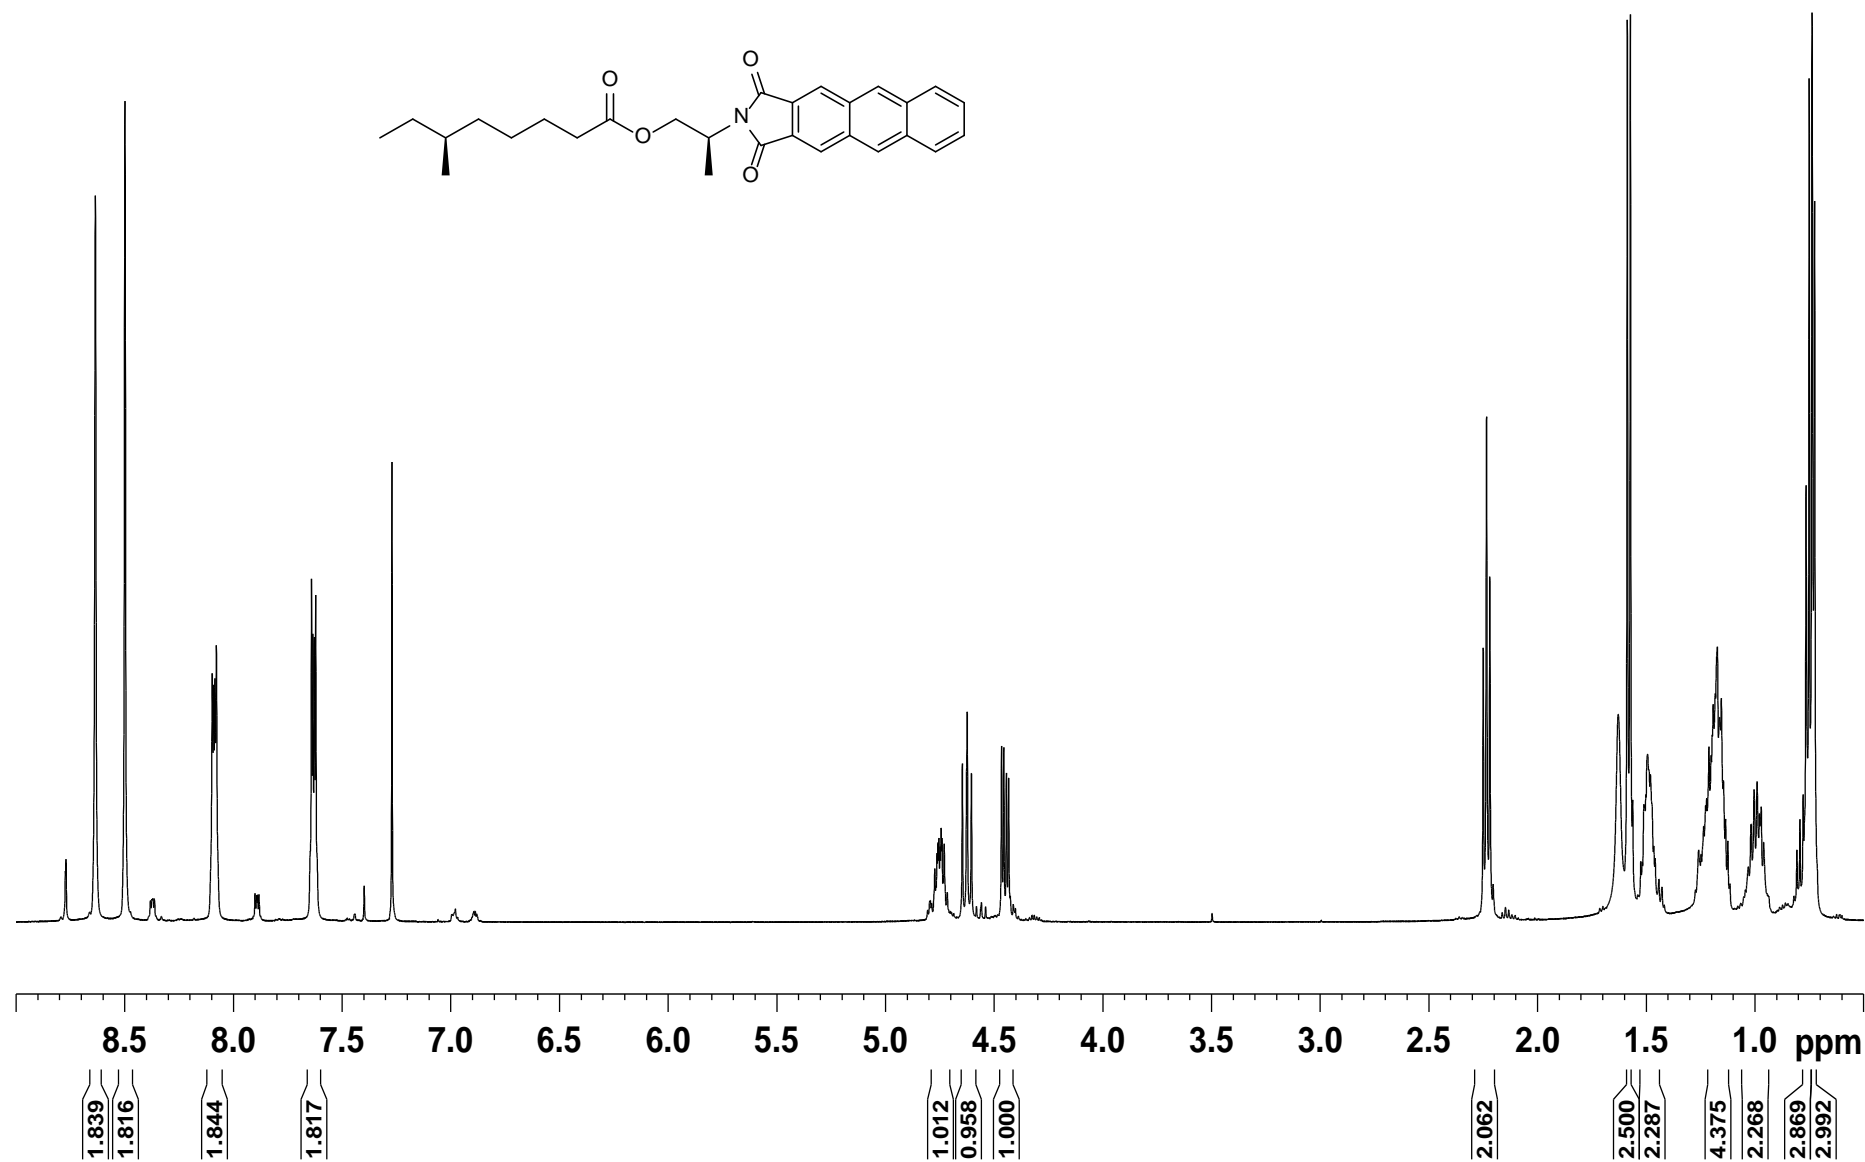

**Figure S36.**  $^1\text{H}$  NMR spectrum of *nat*-**11**-(*R*)-2A1P (500 MHz,  $\text{CDCl}_3$ )

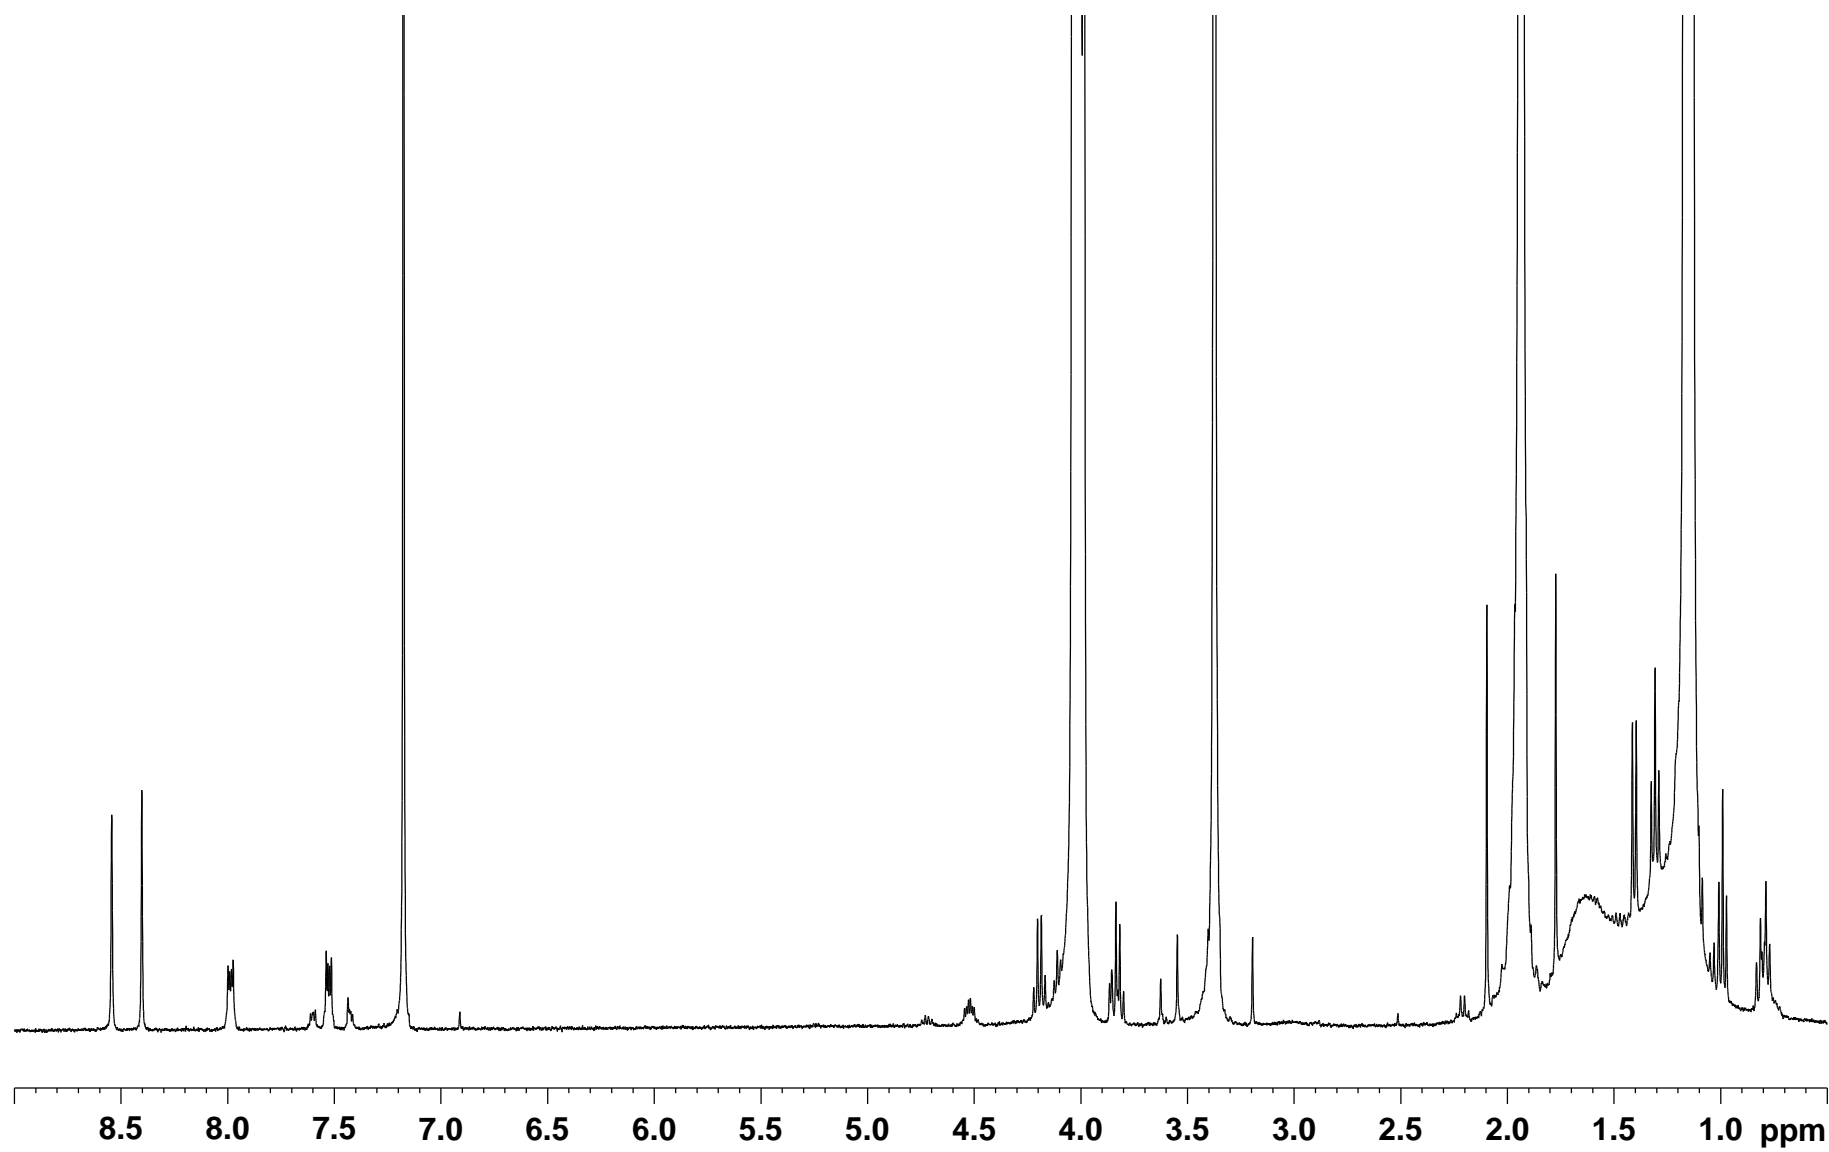

**Figure S37.**  $^1\text{H}$  NMR spectrum of *nat*-**12**-(*R*)-2A1P (500 MHz,  $\text{CDCl}_3$ )

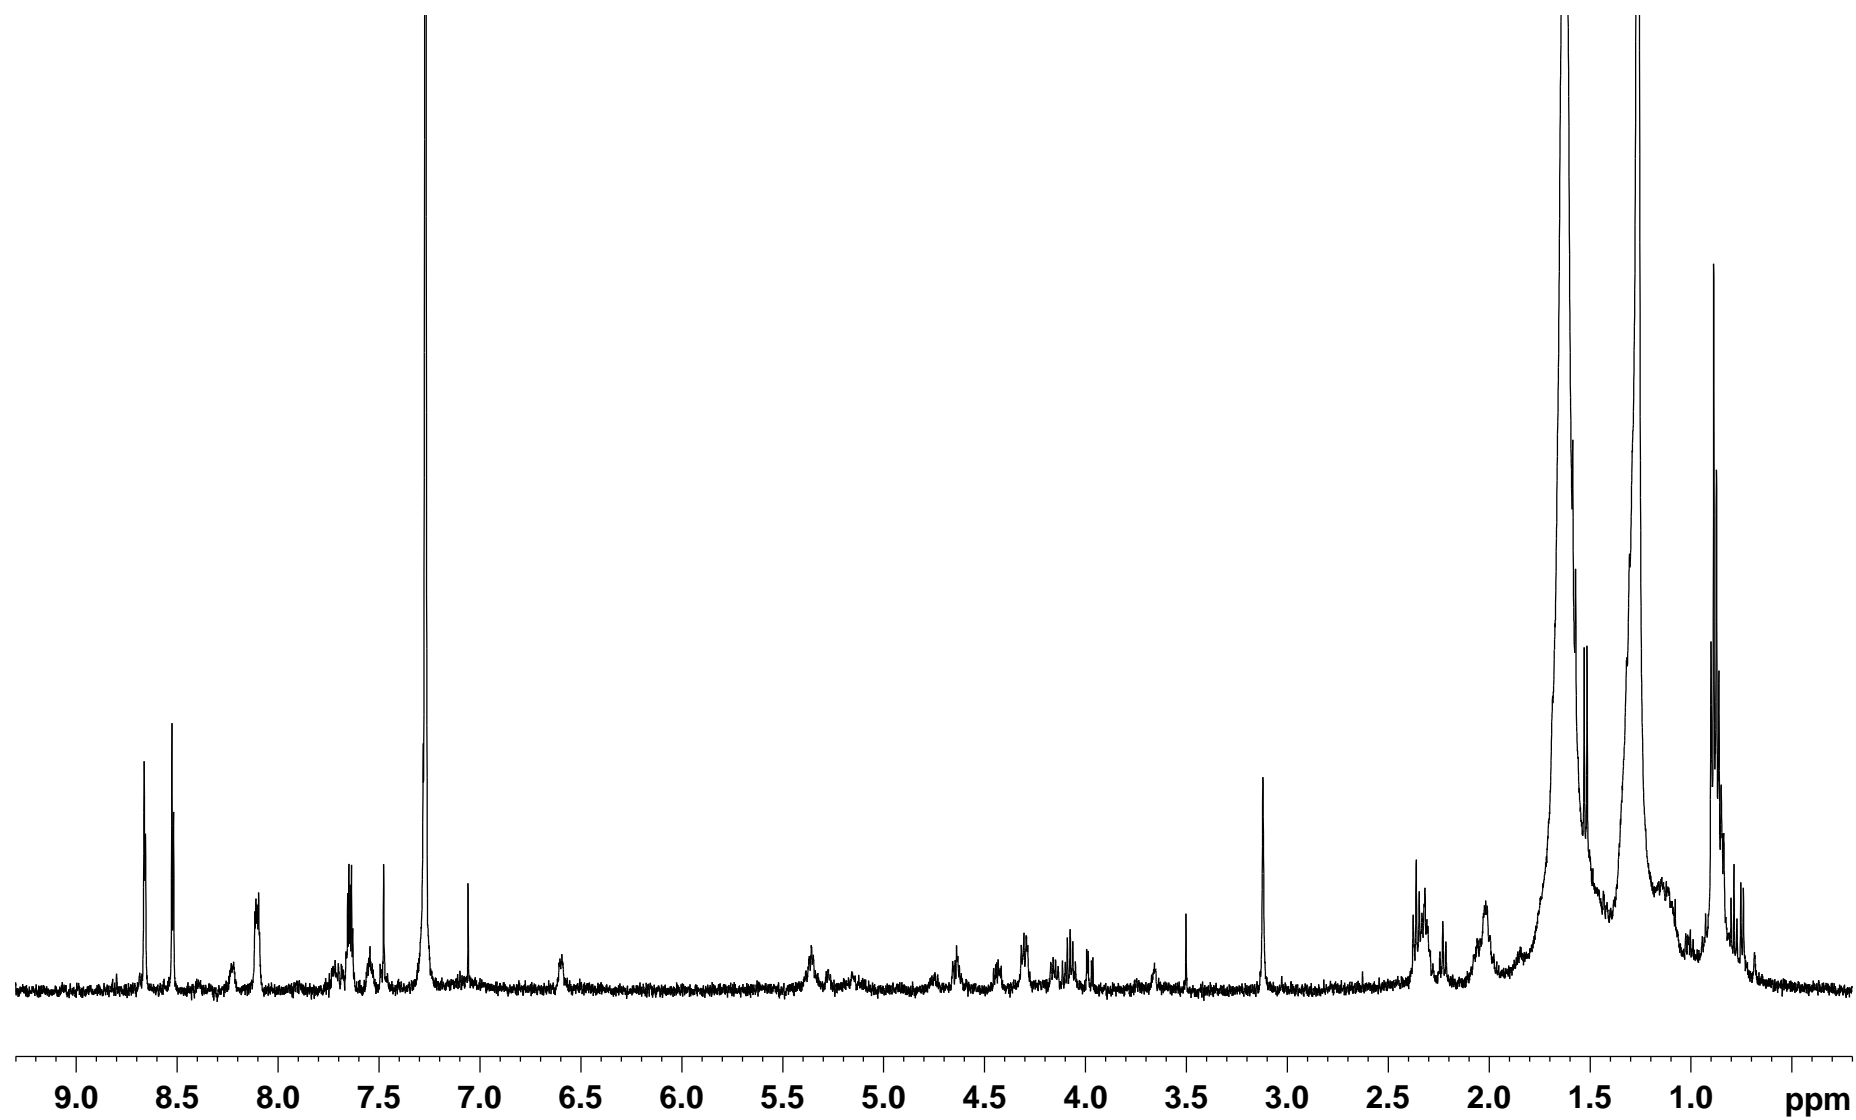

**Figure S38.**  $^1\text{H}$  NMR spectrum of authentic (*S*)-**11**-(*R*)-2A1P (500 MHz,  $\text{CDCl}_3$ )

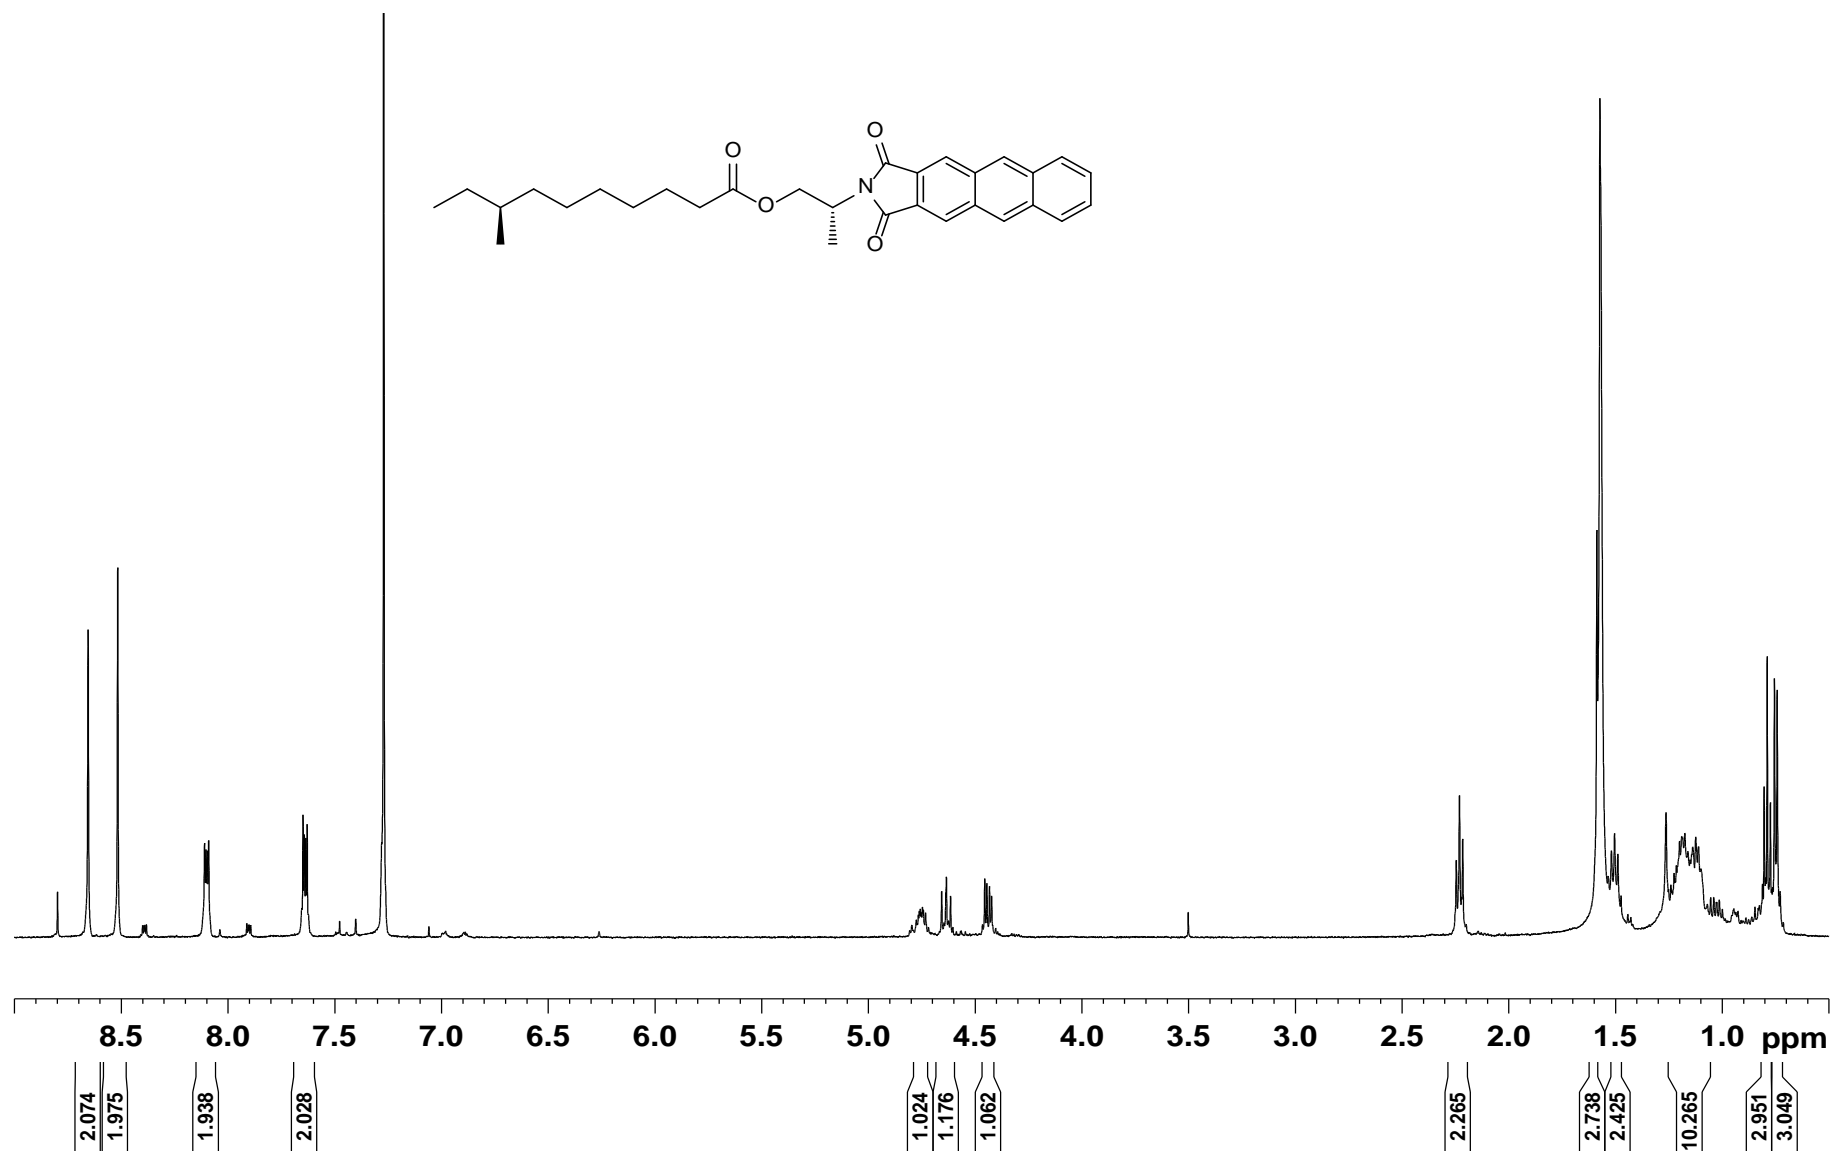

**Figure S39.**  $^1\text{H}$  NMR spectrum of authentic (*S*)-**11**-(*S*)-2A1P (500 MHz,  $\text{CDCl}_3$ )

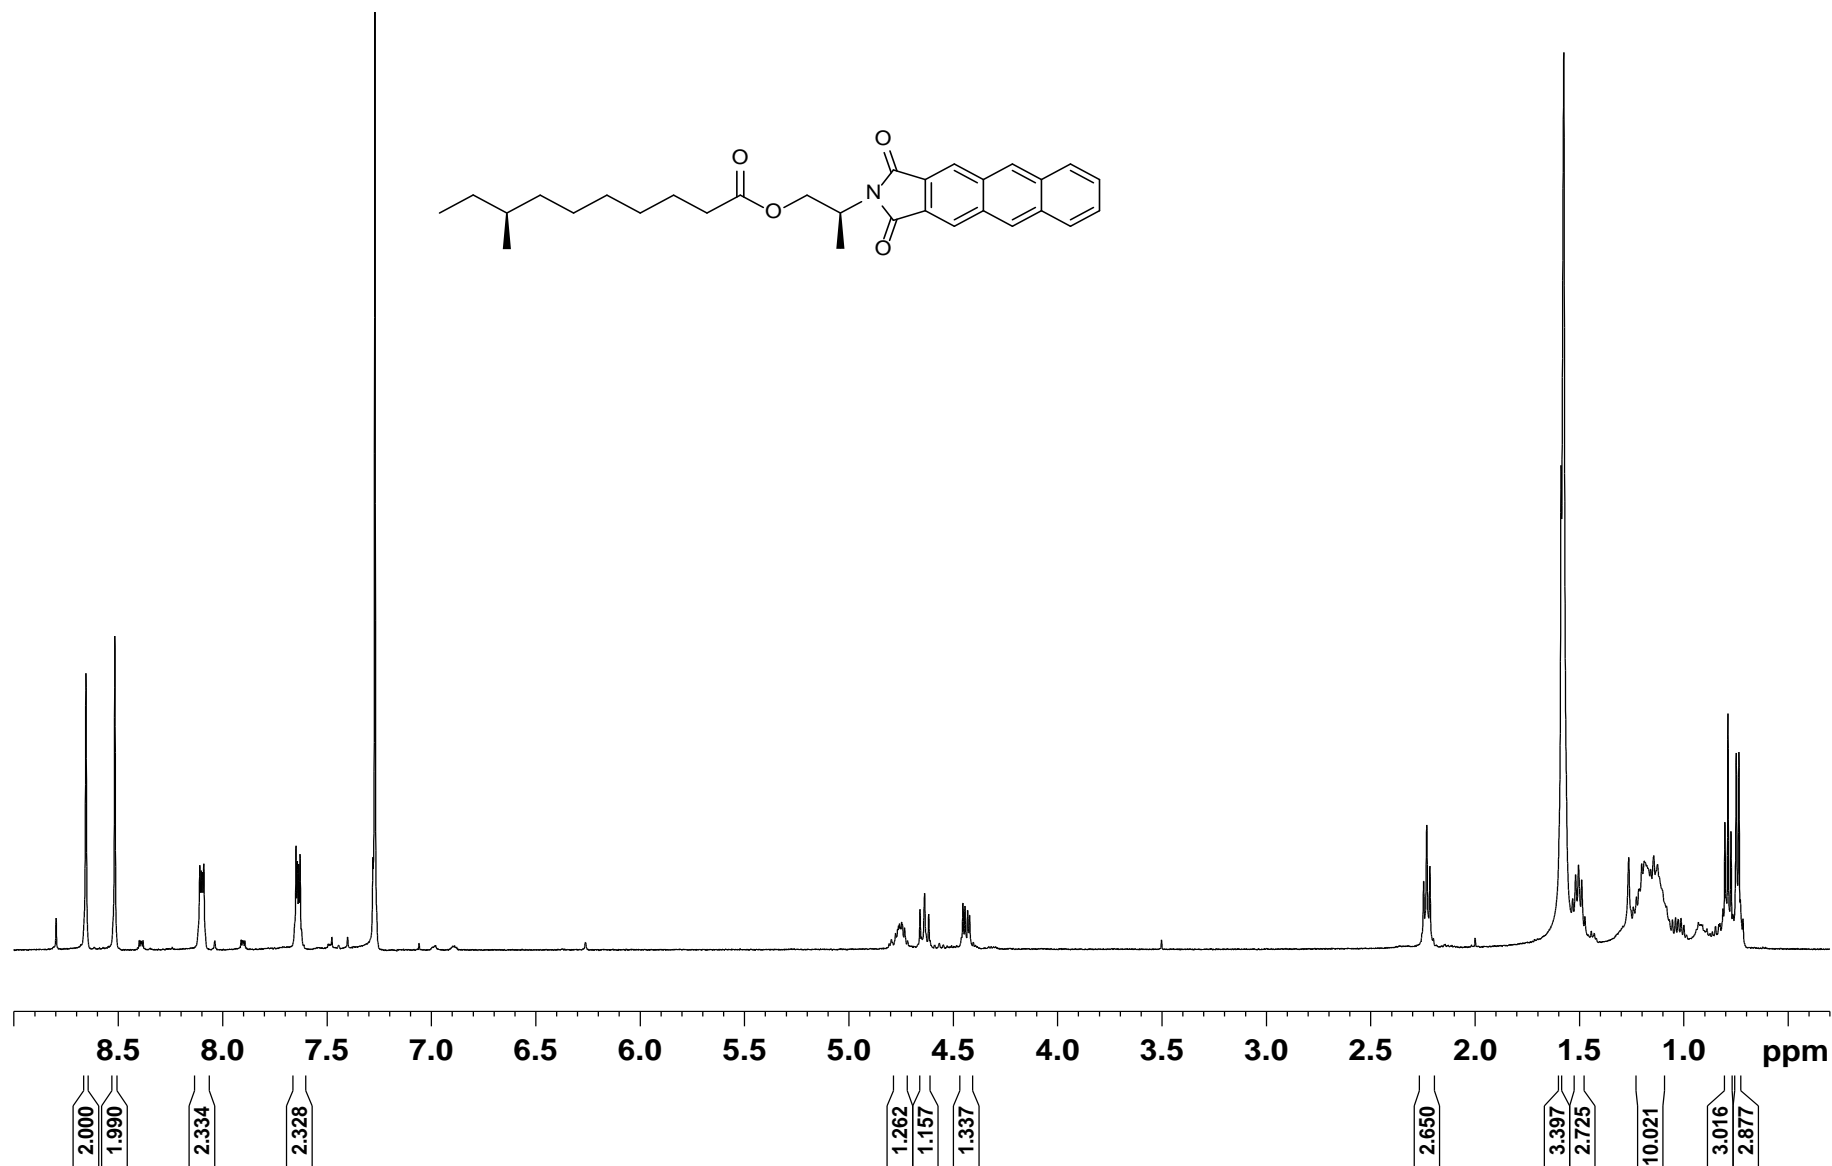

Supplement: Additional file 1 [file 1860-5397-16-222-S1.pdf]
